# Supplementary material for: Cardiac Progenitor Cell Exosomal miR-935 Protects against Oxidative Stress
Source: Cells. 2023 Sep 18;12(18):2300. doi: 10.3390/cells12182300 (PMC10528297; doi:10.3390/cells12182300)
Supplement: Supplementary file 1 [file cells-12-02300-s001.zip]

Archive with 8 entries (8 files):
- cells-2522810-supplementary-figures.pdf
- Table S1. Pimers LisL Aguilar et al., 2023.pdf
- Table S2. Ac reagents. Aguilar et al., 2023.pdf
- Table S3. CPC1-CPC3 Proteomics Data.xlsx
- Table S4. CellsvsExosome_miRNA (CPC3).xlsx
- Table S5. miRNA CPC vs. MSC_HDF.xlsx
- Table S6. Target Trancriptional Factor for CPC exosomal miRNA.xlsx
- Table S7 . ExoMIR functions. Positive and Negative implications in Cancer and Homeostasis.pdf
