# Supplementary material for: Cardiac Progenitor Cell Exosomal miR-935 Protects against Oxidative Stress
Source: Cells. 2023 Sep 18;12(18):2300. doi: 10.3390/cells12182300 (PMC10528297; doi:10.3390/cells12182300)
Supplement: Supplementary file 1 [file cells-12-02300-s001.zip › Table S1. Pimers LisL Aguilar et al., 2023.pdf]

**Table S1.** List of primers used in this study.

### Sequences

| <b>Coding Genes (RT-qPCR)</b> | <b>Primer</b> | <b>Sequence (5'-3')</b>                          |
|-------------------------------|---------------|--------------------------------------------------|
| <b>ARNT2</b>                  | FW<br>REV     | GGAATGCCTACTCCAGTCTTGC<br>CTTTGCCACTGCGACCAGACTT |
| <b>CASP10</b>                 | FW<br>REV     | CCAGGCTATGTATCCTTTCGGC<br>TCGTTGACAGCAGTGAGGATGG |
| <b>NOTCH1</b>                 | FW<br>REV     | GGTGAAGTCTCTGAGGAGATC<br>GGATTGCAGTCGTCCACGTTGA  |
| <b>SOX7</b>                   | FW<br>REV     | TGAACGCCTTCATGGTTTGGGC<br>GTCAGCGCCTTCCACGACTTTC |
| <b>GAPDH</b>                  | FW<br>REV     | AACTGCTTGGCAGCCCTGGC<br>CTGGAGAGCCCCCTCGGCCAT    |
| <b>GUSB</b>                   | FW<br>REV     | CAACGAGCCTGCGTCCCACC<br>ACGGAGCCCCCTTGTCTGCT     |
| <b>WPRE (DNA)</b>             | FW<br>REV     | ACGCAACCCCCACTGGTT<br>AAAGCGAAAGTCCCGGAAAG       |

| <b>miRNAs (Assay Name)</b> | <b>Assay ID</b> | <b>Description (ThermoFisher Scientific)</b> |
|----------------------------|-----------------|----------------------------------------------|
| <b>U6 snRNA</b>            | 001973          | Mouse miRNA normalizer                       |
| <b>mmu-miR-935</b>         | 470972          | Mouse specific miRNA-935                     |
| <b>hsa-miR-935</b>         | 002178          | Human specific miRNA-935                     |
| <b>RNU48</b>               | 001006          | Human miRNA normalizer                       |
| <b>hsa-miR30a-5p</b>       | 000417          | Exosomal miRNA normalizer                    |
| <b>hsa-miR-625-3p</b>      | 002431          | Human specific miRNA-625-3p                  |
| <b>mmu-miR-300-3p</b>      | 000191          | Mouse specific miRNA-300                     |

| <b>Oligonucleotides for transfection</b>      | <b>Catalog #</b> | <b>Description (ThermoFisher Scientific)</b> |
|-----------------------------------------------|------------------|----------------------------------------------|
| <b>mmu-miR-935 Mimic</b>                      | 4464066          | mirVana® miRNA-935 mimic                     |
| <b>mmu-miR-935 Inhibitor</b>                  | 4464084          | mirVana® miRNA-935 inhibitor                 |
| <b>mmu-miR-935 Mimic Negative Control</b>     | 4464058          | mirVana® miRNA Mimic Negative Control #1     |
| <b>mmu-miR-935 Inhibitor Negative Control</b> | 4464076          | mirVana® miRNA Inhibitor Negative Control #1 |
