# Supplementary material for: Cardiac Progenitor Cell Exosomal miR-935 Protects against Oxidative Stress
Source: Cells. 2023 Sep 18;12(18):2300. doi: 10.3390/cells12182300 (PMC10528297; doi:10.3390/cells12182300)
Supplement: Supplementary file 1 [file cells-12-02300-s001.zip › Table S2. Ac reagents. Aguilar et al., 2023.pdf]

**Table S2**      *List of antibodies & imaging reagents used in this study*

**Western & IMM**

| <i>Primary Antibody</i> |               |                                            |
|-------------------------|---------------|--------------------------------------------|
| <i>anti-CD9</i>         | <i>w</i>      | <i>Ab92726 ; Abcam, Cambridge, MA, USA</i> |
| <i>anti-CD63</i>        | <i>w; imm</i> | <i>Ab9269 ; Abcam, Cambridge, MA, USA</i>  |
| <i>anti-CD81</i>        | <i>w; imm</i> | <i>Ab79559 ; Abcam, Cambridge, MA, USA</i> |
| <i>anti-Hsp70</i>       | <i>w</i>      | <i>Ab78434 ; Abcam, Cambridge, MA, USA</i> |
| <i>anti-hnRNP U</i>     | <i>w</i>      | <i>Ab10297;Abcam, Cambridge, MA, USA</i>   |

| <i>Secondary Antibody</i>                                  |               |                                        |
|------------------------------------------------------------|---------------|----------------------------------------|
| <i>Goat Anti-rabbit-HRP</i>                                | <i>w</i>      | <i>P0448 ; Dako, Glostrup, Denmark</i> |
| <i>Rabbit Anti-Mouse-HRP</i>                               | <i>w;imm</i>  | <i>P0260 ; Dako, Glostrup. Denmark</i> |
| <i>Rabbit Anti-Goat-HRP</i>                                | <i>w; imm</i> | <i>P0449 ; Dako, Glostrup. Denmark</i> |
| <i>Goat anti-Mouse IgG (H+L)-<br/>Fluor® 546 conjugate</i> | <i>w;</i>     | <i>A-11030; ThermoFisher, Spain</i>    |
