# Supplementary material for: Cardiac Progenitor Cell Exosomal miR-935 Protects against Oxidative Stress
Source: Cells. 2023 Sep 18;12(18):2300. doi: 10.3390/cells12182300 (PMC10528297; doi:10.3390/cells12182300)
Supplement: Supplementary file 1 [file cells-12-02300-s001.zip › Table S3. CPC1-CPC3 Proteomics Data.xlsx]

## Sheet: Hoja1
		Common to CPC1-CPC3	Only in CPC3	Only in "CPC1_CPC2	ALL
		TLN1	FAT1	TENA	TLN1
		ITAV	URP2	CO3A1	ITAV
		AHNK	AL1A3	PCOC1	AHNK
		K1C9	SRC8	SEMG1	K1C9
		CTNA1	PLOD2	PPBT	CTNA1
		MYOF	PCCB	SCUB3	MYOF
		K2C1	UROM	PCD16	K2C1
		FLNA	PA24A	MXRA5	FLNA
		K22E	PTGIS	MYO1D	K22E
		AMPN	LRIG1	HTRA1	AMPN
		ANXA6	GPC5B	UH1BL	ANXA6
		FINC	AMBP	NCAM1	FINC
		K1C10	PTPRJ	ATL1	K1C10
		FPRP	XPOT	MOXD1	FPRP
		CTND1	HNRPK	SFRP1	CTND1
		PLXB2	M2GD	HAS2	PLXB2
		VINC	EXOC7	VAT1L	VINC
		ITA2	RET4	LAMA5	ITA2
		MYO1C	K2C7	SRGN	MYO1C
		MYH9	SPB9	SEMG2	MYH9
		AT1A1	ZO1	IGHG4	AT1A1
		EHD1	RAI14	LTBP2	EHD1
		KPYM	TRFM	TEN4	KPYM
		5NTD	1A03	CBPB2	5NTD
		SEPR	GSHB	TFPI2	SEPR
		MOES	PACS1	SPB3	MOES
		PGBM	ARHG2	1B45	PGBM
		EF2	EIF3L	DB130	EF2
		IQGA1	MGRN1	S10AG	IQGA1
		ANXA2	S14L2	IGHG2	ANXA2
		ENOA	ENDD1	CTHR1	ENOA
		HSP7C	RPN1	1B07	HSP7C
		G3P	ALDOB	SAA4	G3P
		PDC6I	IF4G2	COIA1	PDC6I
		4F2	ROR1	UT1	4F2
		ITB1	AHNK2	TM119	ITB1
		CLH1	DOCK9	MMP1	CLH1
		VIME	TNIK	MK	VIME
		TRFE	1A23	1A29	TRFE
		GDIB	GRK6	AEBP1	GDIB
		CTNB1	SYCC	ATS14	CTNB1
		PLXA1	STK38	GNA1	PLXA1
		ITA4	NHS	IGHD	ITA4
		ACTN1	LRSM1	HEP2	ACTN1
		CA2D1	DCBD1	LRC32	CA2D1
		ACTA	GCN1L	UNC5B	ACTA
		DYHC1	AP1M1	CO2	DYHC1
		EF1A1	PVRL3	PKHA7	EF1A1
		CYFP1	PACN3	MYCPP	CYFP1
		ANXA5	KC1G3	NXP20	ANXA5
		ITA6	IF2A	PIBF1	ITA6
		E41L3	METK2	RB27B	E41L3
		CD109	TPD54	IMA4	CD109
		DPP4	CLIC3	GREM1	DPP4
		TERA	PDIA4	ITA10	TERA
		HEMO	TNAP3	1B27	HEMO
		EHD2	CTNA2	DHPR	EHD2
		STOM	SYVC	AT1A3	STOM
		NCKP1	TPM4	TIMP2	NCKP1
		DHE3	SQSTM	CO5A1	DHE3
		VAT1	EIF3A	AOFA	VAT1
		PLXD1	CIP4	PSA4	PLXD1
		CSKP	MICA1	ARI4A	CSKP
		ITB5	PDLI5	GNPI1	ITB5
		SPTN1	S23A2	LV302	SPTN1
		FLNB	IRK18	HMCS1	FLNB
		M4K4	ANM5	NTCP	M4K4
		PGK1	RASM	TEBP	PGK1
		1433E	DNJA2	RFTN2	1433E
		YES	ROCK2	NB5R2	YES
		NIBL1	ZPR1	LDH6A	NIBL1
		MYO1B	GFPT2	F126B	MYO1B
		EPHA2	UBR5	AN13A	EPHA2
		GDIA	GSHR	ABCF1	GDIA
		SPTB2	A1AT	MRGRF	SPTB2
		FARP1	IL1B	CEP63	FARP1
		ANXA1	TPM3	RANB9	ANXA1
		UBA1	TRBM	PHF20	UBA1
		IF4A1	MPRI	GSDMC	IF4A1
		DIP2B	HEM2	TRHDE	DIP2B
		K1C14	VATB1	ANGL2	K1C14
		EHD4	RL7	HECD4	EHD4
		FERM2	DDX6	J3KN10	FERM2
		NRP1	RL9	HSPB6	NRP1
		ITA3	VGFR2	S10A6	ITA3
		FAS	PRS7	GGT1	FAS
		LPHN2	RS19	1B13	LPHN2
		ACTB	ARL1	1B15	ACTB
		WDR1	PTGDS	1B35	WDR1
		K2C5	UTRO	RL8	K2C5
		CD166	ST1A1	CLC14	CD166
		TBB2A	ADK	CTGE4	TBB2A
		PLXA2	CATW	TBCB	PLXA2
		AT2B1	EIF3E	AK1BF	AT2B1
		PI4KA	PFD3	NCAM2	PI4KA
		MMP14	GRB2	KV201	MMP14
		DLG1	CDK17	HV304	DLG1
		UGDH	PURA	HV305	UGDH
		G6PI	FLII	FGR	G6PI
		PLCB3	PAK1	MYH3	PLCB3
		NIBAN	DCTN1	EPHA3	NIBAN
		PYGL	DOC11	LIMS1	PYGL
		ITA5	PEAR1	PPOX	ITA5
		EZRI	LARP1	SKOR1	EZRI
		AT2B4	DNMBP	BTK	AT2B4
		CPSM	DEN5B	WDR72	CPSM
		CLIC4	EXOC8	ZFY27	CLIC4
		PLST	TTC40	OLIG3	PLST
		PLAK	PHAR4	KLH23	PLAK
		S12A2	ARFG1	PFD5	S12A2
		FLNC	EHBP1	SCAFB	FLNC
		E41L2	MLL3	MGLL	E41L2
		ALDOA	NBEA	TBA1C	ALDOA
		PGAM1	TS1R2	BBS2	PGAM1
		K6PP	IPO4	NBPF3	K6PP
		TBA1A	DYH7	ANTR1	TBA1A
		LDHA	TFG	F217B	LDHA
		EGLN	AIFM2	SRR1L	EGLN
		GNA11	EIF2A	TEN1	GNA11
		MFGM	N2DL1	PCDGK	MFGM
		MVP	S38A1	TPPC8	MVP
		PECA1	SPNS1	SBDS	PECA1
		SYG	ES8L2	C9J9N5	SYG
		EDIL3	ARL15	E9PHY5	EDIL3
		1433Z	ABI2	H0Y432	1433Z
		CXA1	SYLC	H0YEX5	CXA1
		ACLY	ZDHC8	H7C2K3	ACLY
		GBB1	BAIP2	S12A8	GBB1
		STAT1	C170B	ARH37	STAT1
		RFTN1	ANO9	SBNO1	RFTN1
		BGH3	MRP4	PRS37	BGH3
		STXB3	TGFI1	HTRB1	STXB3
		ACTN4	ADCY3	NPIL2	ACTN4
		ACOC	SODM	ARI3C	ACOC
		CAND1	GPX1	TBKB1	CAND1
		FMNL2	PPAL	CF176	FMNL2
		ABCA1	ACADS	A2ML1	ABCA1
		TFR1	PSB4	P20L1	TFR1
		GNAI2	RL21	WDR64	GNAI2
		HS90A	SYQ	ZN487	HS90A
		PTPRG	MAOX	TGR3L	PTPRG
		ECE1	CTR2	TR10A	ECE1
		ARF1	RS15	RTCA	ARF1
		LRP1	STRUM	PLK4	LRP1
		ACSL4	CAPR1	BT3A1	ACSL4
		1433B	RHEB	BIN1	1433B
		HSP74	2A5E	P3C2B	HSP74
		ADDA	NT5C	COPE	ADDA
		AKA12	OSMR	ABCD4	AKA12
		PCDH1	FR8P1	APAF	PCDH1
		EFR3A	PLS4	ZN213	EFR3A
		GNAS1	ANFY1	CLGN	GNAS1
		LIPB1	TES	ZN263	LIPB1
		EMIL1	D3K174	CE290	EMIL1
		ALDH2	DNM1L	CLOCK	ALDH2
		GELS	MYPT1	MEFV	GELS
		TSP1	EIF3D	RHG06	TSP1
		RALA	COPT1	PAPS1	RALA
		SAHH	CD14	ZSC12	SAHH
		DPYL2	MYH6	ZN208	DPYL2
		GRP78	ATP4A	RGS14	GRP78
		CAN2	SHC1	DCX	CAN2
		TPIS	OST48	CHM2A	TPIS
		AAAT	GSH0	ASNA	AAAT
		FSCN1	EIF3B	BUB3	FSCN1
		AP2A1	ACY1	MAAI	AP2A1
		ANXA4	DYN1	ZF161	ANXA4
		PTPRB	PTGR1	KIF1C	PTPRB
		BASI	TNIP1	CHST1	BASI
		ANX11	SYK	BAI3	ANX11
		DESP	ITSN1	SMCA5	DESP
		JAK1	PDE12	AT8B3	JAK1
		2AAA	KC1AL	USO1	2AAA
		SYAC	CNNM3	AUXI	SYAC
		SH3B4	PSMD1	COBL	SH3B4
		PNPH	METH	AT2C2	PNPH
		ALBU	PLEK2	SEM7A	ALBU
		RAB7A	MAT2B	NCOR1	RAB7A
		PRDX1	RRBP1	PR40A	PRDX1
		SCRIB	EP15R	FBX24	SCRIB
		F1711	COHA1	ERLN1	F1711
		LAP2	CSN3	CLD11	LAP2
		HS90B	MACF1	SF3B1	HS90B
		SYWC	EXC6B	RFPL1	SYWC
		AT1B3	RTCB	RGS9	AT1B3
		RHOA	RBGP1	SRP72	RHOA
		TAGL	GMPPB	PROSC	TAGL
		H90B3	ARVC	RIMB1	H90B3
		DAAM1	MLL2	UBE4B	DAAM1
		GIPC1	RGS12	OAZ2	GIPC1
		CSPG2	PGRC2	SMC2	CSPG2
		MARCS	STX7	NPT2B	MARCS
		PRDX6	NCOAT	HS74L	PRDX6
		TAGL2	LPXN	EMAL2	TAGL2
		TCPG	IF2P	ANGL1	TCPG
		TBB3	UBP12	DLGP3	TBB3
		KIRR1	RHBT3	EOMES	KIRR1
		ITA11	ERBB2	ADH1B	ITA11
		CLIC1	RLA2	HV320	CLIC1
		CN37	RLA0	HBD	CN37
		ARP3	K1C18	APOE	ARP3
		ILK	NPM	APOA2	ILK
		DPYL3	PYRG1	FETUA	DPYL3
		TRXR1	VATB2	TDT	TRXR1
		CDCP1	ZA2G	PRIO	CDCP1
		ADDG	PYR1	A4	ADDG
		PROF1	AL4A1	INSR	PROF1
		K1C16	BMR1A	ACBP	K1C16
		MRP1	PERI	PGK2	MRP1
		RAP1A	PSD7	HEXB	RAP1A
		CAP1	THOP1	CP3A4	CAP1
		TENS1	RD23A	5HT1A	TENS1
		RASH	VA0D1	GSTM1	RASH
		PDIA1	KPCD	MYZAP	PDIA1
		GSTP1	ASPH	41	GSTP1
		G6PD	ACACA	DMD	G6PD
		ENPL	LIPA1	TPR	ENPL
		1433T	FCL	KCRB	1433T
		TCPQ	RAB32	ICAM2	TCPQ
		PPIA	GIT2	ENOB	PPIA
		TCPB	SMAD1	ANPRA	TCPB
		SNP23	HCDH	GCFC2	SNP23
		PLIN3	PPR18	ZNF7	PLIN3
		CPNE3	RB6I2	SDC1	CPNE3
		FYN	PLCD3	PLCG1	FYN
		CAN1	RAI3	RO52	CAN1
		HSP71	NEK7	FST	HSP71
		NEP	SH3K1	FILA	NEP
		CADH2	GMPPA	PERL	CADH2
		RS3	IPO9	KCNA5	RS3
		COF1	RSF1	TNFL4	COF1
		1A01	NP1L4	CPT2	1A01
		CAD13	CHM4A	LAMA2	CAD13
		PSA	TB182	CRHBP	PSA
		DIP2A	TMM8A	IBP5	DIP2A
		PXDN	PEF1	EDNRA	PXDN
		ZDHC5	VPS28	RS12	ZDHC5
		SDCB1	ASC	PSB6	SDCB1
		GNAI3	PSD13	PML	GNAI3
		PTK7	S12A4	KAIN	PTK7
		GNA13	PLAP	OAS2	GNA13
		PLEC	GIT1	DOPD	PLEC
		ANO6	ORN	PUR8	ANO6
		ZCCHV	E5RI81	S10A7	ZCCHV
		TBB6	ESYT2	SDC4	TBB6
		S4A7	T131L	TIA1	S4A7
		IPO5	VWA8	GRK4	IPO5
		K2C6A	GRD2I	DCTD	K2C6A
		ITB3	EFCB5	OPRD	ITB3
		TKT	XIRP2	WNT5A	TKT
		PGM1	POTEF	SK2L2	PGM1
		PLCD1	MA13P	MTOR	PLCD1
		GBB2	CL070	CASP3	GBB2
		FAT4	F115C	KI2S4	FAT4
		CTL1	CB071	NKX21	CTL1
		KCD12	RHG42	RL29	KCD12
		MRCKB	WASH1	LEG7	MRCKB
		AL1A1	CCL24	HSP13	AL1A1
		CD97	MASP2	B3A3	CD97
		TCPD	PSD12	DHYS	TCPD
		6PGD	PGRC1	INPP	6PGD
		SND1	EXOC5	RBM25	SND1
		PVRL2	PSDE	RGS19	PVRL2
		ADA10	NCKP5	ZN165	ADA10
		MOT4	DPYL4	CSRP3	MOT4
		SERA	CTRO	CDK9	SERA
		IDHC	AP3D1	LRBA	IDHC
		LDHB	TMG1	RT29	LDHB
		RRAS	ITBP1	BRCA2	RRAS
		SRC	RIOK3	MECP2	SRC
		SYTC	PSA7	CNN1	SYTC
		MUC18	ZN646	RPAB3	MUC18
		1433F	SPTN2	HNRPF	1433F
		K1609	TCPR2	AK1C2	K1609
		TAOK1	NPC1	NUP98	TAOK1
		PARVA	SCAM2	LBX1	PARVA
		ICAM1	IMA5	HIRA	ICAM1
		RAP2A	ZBT7B	EMP2	RAP2A
		EPHB2	SURF4	AFAD	EPHB2
		PUR9	MOT5	CASP9	PUR9
		TGFR2	NVL	CAD15	TGFR2
		COPA	MAGB4	ARL4C	COPA
		ARP2	XLRS1	BACE1	ARP2
		RAC1	DC1L2	RAB25	RAC1
		NOTC2	LRRT2	CG301	NOTC2
		STXB2	VIP2	UBC12	STXB2
		NDRG1	GRID2	TGFB2	NDRG1
		VPS35	DENR	COPZ1	VPS35
		MPP6	TPPC3	SKP1	MPP6
		SYNC	ZN207	GBG5	SYNC
		CATA	CIKS	COG7	CATA
		ATPB	SAHH2	ENTK	ATPB
		C1TC	PLIN1	PKD1	C1TC
		PABP1	FZD6	PAX5	PABP1
		RINI	CUBN	GNA12	RINI
		CBR1	ADCY9	TLE3	CBR1
		ARF4	DIAP1	LRC63	ARF4
		SPB6	IMA7	AMPE	SPB6
		UBP5	SNX2	DDR1	UBP5
		GDIR2	DIAP2	VAC14	GDIR2
		AP2B1	NBN	CGNL1	AP2B1
		GNAI1	SLIT1	HMGX3	GNAI1
		AP1B1	CLU	ARHG5	AP1B1
		IMB1	DJC13	PTN13	IMB1
		RSU1	PHAR2	NFAC3	RSU1
		TCPH	CILP1	MKRN3	TCPH
		PLCB1	TBCA	IFT88	PLCB1
		NDK8	TRIM3	PTPRS	NDK8
		CPNS1	SC22B	DC1I2	CPNS1
		LEG1	CDC45	BFSP2	LEG1
		ACE	GPC4	PRP4B	ACE
		TGM2	KBL	PIN1	TGM2
		MYH10	SPAG6	ATR	MYH10
		TCPZ	UTP20	SNX1	TCPZ
		CAPZB	EIF3G	I10R1	CAPZB
		ABCE1	CIB2	CKAP5	ABCE1
		AK1C1	PRAF3	CO9A2	AK1C1
		ITIH4	TRIO	RB33A	ITIH4
		CCD80	CBPD	HNRPD	CCD80
		IGSF8	RGS20	TRI14	IGSF8
		CNDP2	AT10B	FHL2	CNDP2
		FA49B	SC24D	FAK2	FA49B
		PAPS2	ZN432	GALE	PAPS2
		CD44	FRYL	IRK12	CD44
		HS71L	GLSK	KPRA	HS71L
		TCPE	S1PR2	ITPR3	TCPE
		SERPH	LETM1	SMC1A	SERPH
		GDIR1	PPN	STAT4	GDIR1
		STX4	FMNL	CASP8	STX4
		STK10	ASML	GRM7	STK10
		DDAH2	WIZ	GRM4	DDAH2
		RSSA	NDST3	ARHG6	RSSA
		PGFRB	SDPR	KIF14	PGFRB
		K6PL	GNA14	PEA15	K6PL
		PTPRA	FBLN4	NADC	PTPRA
		SATT	DYR	IRF4	SATT
		RAP1B	CAH1	TMED2	RAP1B
		RB11A	LDLR	TBCE	RB11A
		UAP1	EGF	EZH2	UAP1
		AIDA	IFNA2	DDB1	AIDA
		SERC	HV105	ECM1	SERC
		AP2A2	PIGR	KGUA	AP2A2
		HSPB1	IGHM	LAMA3	HSPB1
		ASNS	CO2A1	TPD53	ASNS
		CH60	LMNA	ZRAS1	CH60
		NDKA	APOC3	WASH7	NDKA
		TCPA	FIBA	ERC6L	TCPA
		ANXA7	APOD	SMU1	ANXA7
		GRP75	IPSP	ATG2A	GRP75
		MAP1B	ISG15	ZN800	MAP1B
		1433G	AT5G1	KLH38	1433G
		RAB1A	AP2A	ANO4	RAB1A
		RHOG	KPCB	NBPF8	RHOG
		DSG1	CO5A2	CK085	DSG1
		LAMA4	PKHD1	HYDIN	LAMA4
		FERM1	CD7	PDLI3	FERM1
		CCM2	LOX5	TYW2	CCM2
		ARPC2	FREM3	WDR81	ARPC2
		TBB5	CO4A	M3K19	TBB5
		LAMB1	S31C1	BRDT	LAMB1
		PYGB	LYAG	ODFP2	PYGB
		CALR	POK10	HABP4	CALR
		KINH	MAP2	LRRK2	KINH
		GNAQ	SPTB1	EYS	GNAQ
		NP1L1	NFH	SKT	NP1L1
		RAP2B	FA5	WLS	RAP2B
		RRAS2	IL7	CCD18	RRAS2
		NID2	P4HA1	VP13D	NID2
		POSTN	ETFA	EFCB6	POSTN
		PTPRK	GLU2B	OBSCN	PTPRK
		UGPA	EPB42	F16B1	UGPA
		CHP1	AT2A2	K2C79	CHP1
		GBB4	HSP76	KCD11	GBB4
		RAB23	RHOQ	SCAR3	RAB23
		ZNT1	KPCA	CPIN1	ZNT1
		CO1A1	LFA3	OVOS1	CO1A1
		SRG2C	NUCL	F166A	SRG2C
		TCTP	NFKB1	FA53A	TCTP
		NQO1	TYPH	TYW1B	NQO1
		AATC	RAB3A	R13AX	AATC
		ANPRB	RAB4A	GNN	ANPRB
		CALX	MPRD	NFRKB	CALX
		KCY	ICAL	F171B	KCY
		PDIA3	NF1	EMB	PDIA3
		STIP1	MUTA	ZNT9	STIP1
		SYSC	CCNO	ZN322	SYSC
		RAB2A	AMPD1	KCNT2	RAB2A
		CALM	PGH1	OLFM4	CALM
		EFNB1	CRCM	ZN836	EFNB1
		TIE2	EF1B	R9BP	TIE2
		TNAP2	DNAS1	PTHD4	TNAP2
		ADO	PAR1	CV029	ADO
		LG3BP	PSA1	RIR2B	LG3BP
		DPYD	S10A4	NLRC3	DPYD
		TPBG	PDE4A	GVIN1	TPBG
		CD276	PSA5	PIWL3	CD276
		CTL2	CD34	TT21B	CTL2
		NICA	TPP2	MAAT1	NICA
		ITCH	ERP29	RBBP6	ITCH
		HHIP	PRDX3	HUWE1	HHIP
		MYADM	HNRH1	DPP9	MYADM
		RAB34	MC5R	MAGI2	RAB34
		DPP3	ERD22	N4BP2	DPP3
		S39AA	GLYC	CASZ1	S39AA
		HEG1	MPI	MORC1	HEG1
		LYN	CXA5	PKHL1	LYN
		LKHA4	TNR3	ZN227	LKHA4
		GTR1	GPX4	F90A1	GTR1
		SYHC	AN32A	P66A	SYHC
		SL9A1	CUX1	C1QL4	SL9A1
		DNJA1	CAP2	AT2L2	DNJA1
		DNSL1	UBA7	GCC2	DNSL1
		VASP	SYIC	RHG12	VASP
		HSP72	FRK	SGPP2	HSP72
		EPHB4	LPPRC	UN45B	EPHB4
		IF5A1	THIM	UEVLD	IF5A1
		CKAP4	HD	RM41	CKAP4
		SCRB2	SSRA	M21D2	SCRB2
		2002-09-01	KI2L2	DI3L2	2002-09-01
		FMNL3	RL27A	SLN12	FMNL3
		PKHO2	NEST	RASEF	PKHO2
		HS105	KC1A	WDR17	HS105
		DOC10	NRAM2	THMS1	DOC10
		PDC10	FNTA	VWDE	PDC10
		GAPR1	ARRB1	DOS	GAPR1
		RTN4	EFTU	TMTC2	RTN4
		EVA1B	CENPF	GLTL2	EVA1B
		CAB39	PPM1F	PGBD5	CAB39
		WASF2	TMEDA	MESH1	WASF2
		TBB4A	RBP2	CJ012	TBB4A
		AT1B1	GSK3B	CGAT2	AT1B1
		PAI1	LHX2	CA065	PAI1
		APT	RL14	LRC52	APT
		MMP2	PLXA3	YS059	MMP2
		PEBP1	KS6A3	EFHB	PEBP1
		IL6RB	ADCY7	CNTD1	IL6RB
		IMA2	IMA1	ZN614	IMA2
		CAZA1	KIF11	MUT7	CAZA1
		MOT1	VAV2	GG6L2	MOT1
		IST1	EFNB2	ILFT1	IST1
		SYRC	NUDT6	UN13C	SYRC
		XPO2	CATC	P5I13	XPO2
		RS27A	EPHB1	GIMA8	RS27A
		GFPT1	KAD2	BANK1	GFPT1
		LASP1	S12A3	CCD54	LASP1
		L2GL1	PSMD4	DDHD1	L2GL1
		SC23A	DRG2	NAV1	SC23A
		ZYX	CADH6	BD1L1	ZYX
		RHDF1	BID	MYRIP	RHDF1
		CPNE2	GBG2	EXOC6	CPNE2
		CPNE1	AP1S1	PMFBP	CPNE1
		ESYT1	TSN5	PHOP2	ESYT1
		ACTBM	PP1B	CIP2A	ACTBM
		E41L5	RS23	NEK9	E41L5
		PSAL	RS29	DYH3	PSAL
		KRIT1	SMD1	GRP4	KRIT1
		PDE8A	UB2D2	GRHL3	PDE8A
		PDCD6	RS24	DTD1	PDCD6
		MPZL1	RS26	SH3R3	MPZL1
		HPT	GAK12	SMCR8	HPT
		K1C13	SERB	PARD3	K1C13
		TYK2	PI42B	CR3L4	TYK2
		VATA	KC1G2	SHRM3	VATA
		RAB5C	PRKDC	NOC3L	RAB5C
		SNAA	RL19	ZDHC1	SNAA
		RAB10	CP4F8	F172A	RAB10
		UBE2N	AT8B2	TRUB1	UBE2N
		HBA	CDK16	ABCAA	HBA
		SRPX	CNTN2	S100Z	SRPX
		FAK1	MMSA	CCG8	FAK1
		H90B2	CO7A1	AUTS2	H90B2
		MRCKA	MLL1	MYLIP	MRCKA
		TTC7B	IF4G1	SORL	TTC7B
		OTUB1	KPCT	SHIP1	OTUB1
		PI51A	WIT1	USP9X	PI51A
		TAOK3	C1QBP	1B38	TAOK3
		TBB1	ECHP	NKD2	TBB1
		XPP1	M4K2	ITFG2	XPP1
		PSD3	MYO1E	JKIP2	PSD3
		EHD3	NPRL3	MIB2	EHD3
		2009-09-01	SEC20	SARAF	2009-09-01
		XRP2	CSN1	ULK4	XRP2
		AGM1	TADBP	FXRD1	AGM1
		ENOG	PAPP1	I17RA	ENOG
		UCHL1	KGP2	SREC2	UCHL1
		LAMC1	PABP4	DDX27	LAMC1
		IMDH2	SNTB2	DOCK6	IMDH2
		RAB5A	MYO9B	INT4	RAB5A
		MK01	VPP3	SUCB2	MK01
		UFO	CUL4B	DYH8	UFO
		CTR1	DAG1	ZN521	CTR1
		MERL	GGTL2	ZFR	MERL
		RADI	SEM3A	RILP	RADI
		MDHC	IRF3	ZN558	MDHC
		F10A1	PSME4	BROMI	F10A1
		RAB13	AT7L3	SIG12	RAB13
		ARF6	PSMD6	PKH4B	ARF6
		ADA17	IF4H	UBP28	ADA17
		UPAR	PDK2	FNBP1	UPAR
		PSMD2	2A5B	RB40C	PSMD2
		MELT	ELOC	MINT	MELT
		PKN1	DLGP5	CDC5L	PKN1
		ABI1	RYR3	FMO2	ABI1
		FA26E	KS6A1	SORT	FA26E
		ENAH	RGN	PKP4	ENAH
		VANG1	TESK1	MNT	VANG1
		FRMD6	TRIP6	TBX5	FRMD6
		DCBD2	MARE1	CCL13	DCBD2
		S29A1	SMAD2	FEZ1	S29A1
		THIC	SCN9A	COQ7	THIC
		VP37B	ZFHX3	MYOC	VP37B
		HEBP1	GRIK4	G3ST1	HEBP1
		TMEM2	PKN2	HEPH	TMEM2
		COR1C	TBR1	TBB2B	COR1C
		RUVB1	MA2A1	SRRT	RUVB1
		CAN5	DGKD	CECR6	CAN5
		SRGP2	T132A	PACN1	SRGP2
		FARP2	CL16A	KDM5D	FARP2
		PRS23	K1109	AGT2	PRS23
		THY1	ZN630	SETD2	THY1
		CD63	KBTB5	RHBT2	CD63
		ALDOC	FR1L6	B3GN4	ALDOC
		RALB	ATHL1	S6A16	RALB
		IDE	GFOD2	RSPH9	IDE
		K2C4	UAP1L	SPTN4	K2C4
		RAB3B	CHD9	HIPK2	RAB3B
		PUR6	K2C71	LRRN3	PUR6
		NNMT	TB10B	RHOJ	NNMT
		SYYC	IQCC	ZN768	SYYC
		MYL6	PLCH1	SUV92	MYL6
		CDC42	FWCH1	ASB7	CDC42
		RAB14	PHLA2	CF106	RAB14
		PP1A	XKR6	BCAS3	PP1A
		RAN	ZN311	SMYD3	RAN
		HBB	AKAP4	SFR19	HBB
		GLGB	CD158	RMI1	GLGB
		ABR	FREM2	RPA2	ABR
		FLOT2	FKB15	RENT2	FLOT2
		PP1R7	NHRF3	RNPL1	PP1R7
		PSMD5	FRY	RC3H2	PSMD5
		CSPG4	STRP1	TANC2	CSPG4
		BT2A1	CE350	ANKH	BT2A1
		TNPO1	SYDE2	CHD8	TNPO1
		SH3G1	GARL3	PLXA4	SH3G1
		GDF15	IQEC1	TNR12	GDF15
		AMPB	CAPR2	MYOZ2	AMPB
		PACN2	MED27	NLRC4	PACN2
		RAP2C	PLBL1	LUC7L	RAP2C
		GPC6	CNNM4	INCE	GPC6
		DDX3X	INT5	KI13B	DDX3X
		PUR4	TM154	ZN331	PUR4
		ARC1B	NCEH1	ITM2C	ARC1B
		PSMD3	ATRAP	ZN277	PSMD3
		NB5R3	ANR11	OLFL3	NB5R3
		CFAB	PI16	SALL1	CFAB
		IGHA1	IGS10	SAC1	IGHA1
		FUMH	THADA	ANKR5	FUMH
		DAF	YA014	MDN1	DAF
		PTPRF	YJ005	ARL8B	PTPRF
		PRS6A	YK025	WDR70	PRS6A
		PUR2	ACD11	SMOX	PUR2
		PTPRD	UBP34	THG1	PTPRD
		EF1G	KCTD1	CWC25	EF1G
		AMPL	LCA10	BRE	AMPL
		PRDX5	CENPQ	KLH28	PRDX5
		PRDX2	RRAGA	ZN586	PRDX2
		STX2	MICA3	CA2D2	STX2
		PAXI	CAD24	FA13B	PAXI
		ITA1	ZFHX4	GLTP	ITA1
		NCS1	PHLB1	DJC27	NCS1
		2ABA	IQGA3	CALL5	2ABA
		GSTO1	HOGA1	DYH2	GSTO1
		CALD1	DDX42	K1468	CALD1
		BST1	K0528	ZNFX1	BST1
		DCTN2	TMPS6	WDR35	DCTN2
		RAB31	CLC10	KLH13	RAB31
		BMPR2	PLD3	HECW2	BMPR2
		RASA3	DYH10	RBL2A	RASA3
		PDIA6	WDR75	DBF4A	PDIA6
		FILA2	SULF2	MO4L1	FILA2
		TWF2	TEX11	SL9A2	TWF2
		PTRF	F186B	REV1	PTRF
		HORN	ZN101	S14L4	HORN
		MINK1	XRN1	S14L3	MINK1
		AP2M1	ABCA6	CCD39	AP2M1
		ELMO2	ZN664	SWP70	ELMO2
		S38A2	MPP5	S12A6	S38A2
		HCD2	T132C	CTNA3	HCD2
		HYCCI	TXND3	TEKT2	HYCCI
		FRMD8	LRC71	STAG3	FRMD8
		MST4	ZN713	GMEB2	MST4
		NAGK	ANR44	GPTC8	NAGK
		STK24	F133A	MYH13	STK24
		ROBO1	EIF1A	CDV3	ROBO1
		VPS4A	FEAS1	2001-08-01	VPS4A
		PDLI1	AT11C	NRX1A	PDLI1
		PLD2	SYT14	ZN608	PLD2
		TOM1	KY	CIZ1	TOM1
		ATRN	PAIRB	ALK	ATRN
		AL1L1	KCNH5	TBX20	AL1L1
		GLRX3	DYHC2	NDRG2	GLRX3
		RECK	ZN740	SNX7	RECK
		1A02	SPAT4	BSN	1A02
		LAMP1	OR4M2	COR2B	LAMP1
		FAAA	MCFD2	HDAC5	FAAA
		ML12A	SHKB1	NUDC	ML12A
		S1PR1	PI42C	VDAC3	S1PR1
		CD9	TRPM4	FBW1A	CD9
		PURA2	ATS15	PADI2	PURA2
		NAMPT	ZN418	SIK3	NAMPT
		PIPNB	DUS19	ZKSC5	PIPNB
		S26A2	TF3C2	PDIP2	S26A2
		GDS1	SNX33	YBOX2	GDS1
		CRIP2	MITD1	COQ4	CRIP2
		ANTR2	LMO7	GRIP1	ANTR2
		CD81	SYNE2	CCDC9	CD81
		STXB1	MUC16	UBP15	STXB1
		GBLP	ASB15	LSM5	GBLP
		BASP1	IRGQ	LSM4	BASP1
		LAT1	S14L1	ASB1	LAT1
		PLOD1	DYRK2	TIM22	PLOD1
		PTN11	STAM1	GCFC1	PTN11
		PCBP1	RAD50	MOFA1	PCBP1
		RHDF2	PRG4	DDX49	RHDF2
		BZW1	SCAM4	F169A	BZW1
		RHG18	H2B1A	CMTA1	RHG18
		LRC57	COAC	A8MXT8	LRC57
		PSA7L	GCC1	B1AK87	PSA7L
		CHMP6	RCN3	B1ALK7	CHMP6
		PARK7	WDR67	B4DIE6	PARK7
		TS101	T3HPD	B4DNN6	TS101
		AL8A1	EDC3	B4DPM9	AL8A1
		SLK	WDR89	B4E1W4	SLK
		CLMP	T176A	B5MCM8	CLMP
		UBTD1	FXL20	B8ZZF0	UBTD1
		MYO10	MAP6	B9A054	MYO10
		OLA1	MARK4	C9JB33	OLA1
		RUVB2	PGRP4	C9JNN6	RUVB2
		YKT6	GBP5	C9JSL2	YKT6
		PLXB1	NED4L	D6RF23	PLXB1
		6PGL	PLIN4	D6RJF3	6PGL
		HPRT	ALS2	E5RFM8	HPRT
		CO3	XPO6	E5RG72	CO3
		IGHG1	NUDC1	E5RJU5	IGHG1
		FRIL	HMCN1	E7EPQ4	FRIL
		CYTB	SEBP2	E7ETL7	CYTB
		CATD	MMS19	E7EUN2	CATD
		THIK	ACOX2	E7EWH7	THIK
		THIO	K1C12	E7EX92	THIO
		CD59	EIF3C	E9PC11	CD59
		NID1	TTC1	E9PG90	NID1
		RAC2	RGPD5	E9PI68	RAC2
		RS2	LYST	E9PPG5	RS2
		LEG3	SMAD5	F5GY05	LEG3
		RAB6A	ACON	F5GYV6	RAB6A
		VDAC1	MYD88	F5GYX2	VDAC1
		THTM	AKAP9	F5H204	THTM
		TNR6	CND3	F5H450	TNR6
		IMPA1	NUD12	F5H5C2	IMPA1
		BLVRB	BUD13	F6RGB9	BLVRB
		MYH11	VPS25	F6WIG9	MYH11
		CRK	TBCD	F8VXL3	CRK
		CRKL	MTNA	F8W059	CRKL
		AL7A1	TMED9	F8W8T0	AL7A1
		PSN1	RFIP5	F8WFE1	PSN1
		DYN2	PRAX	G3V1K3	DYN2
		RD23B	S12A9	G3V335	RD23B
		UBE2K	TDRD1	G5E9Y1	UBE2K
		RS7	S4A5	H0Y5R0	RS7
		ERF1	TANC1	H0YAD5	ERF1
		PP2AA	WDR61	H0YB56	PP2AA
		LGUL	PEG3	H0YER2	LGUL
		BAX	ZN541	H0YGR3	BAX
		KLC1	UBP44	H0YI45	KLC1
		PICAL	ARL6	H0YIA6	PICAL
		NACA	NXF5	H0YKM7	NACA
		S39AE	VP33B	H0YM60	S39AE
		CDC37	TARA	H0YNH0	CDC37
		DDR2	S6A15	H3BLT2	DDR2
		C2D1B	DHX36	H3BN19	C2D1B
		FA65A	BOLA2	H3BNM6	FA65A
		GOGA7	BORG4	H3BPR3	GOGA7
		K2C1B	RWDD1	H3BRG0	K2C1B
		CPNE8	ESF1	H3BRQ1	CPNE8
		K2C78	ZN644	H3BUQ9	K2C78
		ARRD1	PIEZ2	H3BV35	ARRD1
		TXND5	CS044	H3BVC7	TXND5
		NNRE	NRDE2	H7C1G7	NNRE
		TSN14	CN093	H7C4X8	TSN14
		RLA0L	CF211	H7C4Y5	RLA0L
		TITIN	I20L2	I3L394	TITIN
		OSTF1	MAGF1	I3L3R5	OSTF1
		VPP1	B2L12	I3L4E8	VPP1
		RSPRY	PATZ1	I3L4T9	RSPRY
		CNRP1	ZFYV1	I6L893	CNRP1
		SPB12	NEK6	J3KP28	SPB12
		SNAG	CPNE5	J3QLK4	SNAG
		ELTD1	2004-08-01	J3QR08	ELTD1
		RB22A	S10AE	J3QRP3	RB22A
		MAGD2	SRA1	K7EIG2	MAGD2
		PA2G4	WDR6	K7EJ87	PA2G4
		STRAP	SYSM	K7EJU9	STRAP
		SNX9	TM138	K7ELG9	SNX9
		EPN1	G6PC2	K7ES10	EPN1
		BACH	BIRC6	K7ES38	BACH
		ARPC3	PDLI7	K7ES51	ARPC3
		TXNL1	DDX21	Q5JZB8	TXNL1
		GGCT	4ET	Q6ZP13	GGCT
		VP26A	LATS2	Q86W61	VP26A
		OXSR1	ADPPT	Q9Y628	OXSR1
		A2MG	ACN9		A2MG
		RHOC	SERC1	710	RHOC
		PGFRA	LANC2		PGFRA
		DESM	ATG3		DESM
		GRK5	ACS2L		GRK5
		ARL3	T106B		ARL3
		RL3	EXOC1		RL3
		MDHM	PNPO		MDHM
		OX2G	SDA1		OX2G
		NSF	NECP2		NSF
		NEDD4	SPHK1		NEDD4
		PI42A	TLR7		PI42A
		AL9A1	TMOD3		AL9A1
		GATM	PLK2		GATM
		BIEA	CLIC5		BIEA
		COPB	F120A		COPB
		IF5	SACS		IF5
		RAB8A	LRP1B		RAB8A
		ACTZ	ZSWM5		ACTZ
		RS16	DAPLE		RS16
		FKB1A	BCCIP		FKB1A
		YBOX1	DYH1		YBOX1
		DCD	K1377		DCD
		DAB2	STAR9		DAB2
		MP2K1	TRI10		MP2K1
		K1C17	RGS17		K1C17
		RHG01	KCNN3		RHG01
		TGM3	NDRG3		TGM3
		STX3	BAZ2A		STX3
		PLSI	LCAP		PLSI
		PTPA	RIMS3		PTPA
		STX12	NGAP		STX12
		LRC8A	KS6A6		LRC8A
		CCNY	PARP4		CCNY
		US6NL	MCTS1		US6NL
		DNJC5	ATD2B		DNJC5
		CHM4B	TPC1		CHM4B
		MOB1A	CBLC		MOB1A
		RAB18	NOTC3		RAB18
		ATX10	MYO6		ATX10
		MYO1A	SPAT2		MYO1A
		COPG1	UBQL1		COPG1
		D6RAX3	SNX6		D6RAX3
		CSRP1	EPCR		CSRP1
		SORCN	RL26L		SORCN
		CADH5	K1024		CADH5
		GALK1	SHAN2		GALK1
		2A5D	DICER		2A5D
		LTOR1	SHOC2		LTOR1
		PSD11	SMC3		PSD11
		IMA3	KCC2A		IMA3
		TR10B	K0947		TR10B
		PI51C	ST38L		PI51C
		DFNA5	FRM4B		DFNA5
		VPS4B	AP3M1		VPS4B
		ABCA8	SUGT1		ABCA8
		PAK4	MEMO1		PAK4
		SODC	SHLB1		SODC
		KAD1	DOP2		KAD1
		FRIH	HBS1L		FRIH
		CFAI	TLN2		CFAI
		DCUP	RPGF2		DCUP
		CO1A2	IRS2		CO1A2
		RS17L	MYO5A		RS17L
		ESTD	HYOU1		ESTD
		ADHX	PPME1		ADHX
		CO6A1	PCDGH		CO6A1
		ANXA3	PCDGE		ANXA3
		PLSL	PCDGD		PLSL
		AK1A1	PHLA3		AK1A1
		SPEE	VATD		SPEE
		PSB1	TNPO3		PSB1
		SYT1	SRPRB		SYT1
		PPIB	FLVC1		PPIB
		PTX3	NUBP2		PTX3
		RL12	LYVE1		RL12
		CXG1	HCFC2		CXG1
		RL4	DC1L1		RL4
		GNAL	CABIN		GNAL
		RS9	TLL2		RS9
		PPCE	NCOA3		PPCE
		NUMB	CCD61		NUMB
		EPHB3	DGKB		EPHB3
		ARPC4	B1N949		ARPC4
		RS8	B4DLE8		RS8
		RL7A	B4E2H8		RL7A
		RS4X	B6DY53		RS4X
		RHOB	C9IYF0		RHOB
		RS6	C9JVT3		RS6
		UB2L3	D6R978		UB2L3
		EM55	D6RB52		EM55
		RL6	D6RD58		RL6
		PP2BA	E7ET31		PP2BA
		KIF5A	E9PLI8		KIF5A
		UB2V1	E9PQ36		UB2V1
		CUL1	F2Z3F9		CUL1
		CUL3	F5GXJ6		CUL3
		GANAB	F5H2M7		GANAB
		RAB35	F5H6N3		RAB35
		PCBP2	F5H6R7		PCBP2
		2007-09-01	F5H808		2007-09-01
		BROX	F8W845		BROX
		ZDH20	F8WAG9		ZDH20
		ATLA3	G3V3Y1		ATLA3
		RELL1	H0Y5B0		RELL1
		DDX1	H0Y9T7		DDX1
		LPAR1	H0YBN7		LPAR1
		GP124	H0YCW3		GP124
		TOLIP	H0YDL2		TOLIP
		SH3L3	H0YEM5		SH3L3
		UN45A	H0YHJ7		UN45A
		KC1G1	H7BZJ3		KC1G1
		2011-09-01	H7C270		2011-09-01
		TMM51	H7C306		TMM51
		CHMP5	H7C4P4		CHMP5
		GBG12	I3L4N8		GBG12
		PSME2	J3KRA4		PSME2
		CHIP	J3KRR3		CHIP
		NSF1C	J3QL81		NSF1C
		PDE10	K7EJZ2		PDE10
		JAM1	Q5T0R9		JAM1
		NPTN	Q5VU61		NPTN
		J3KT37	Q5VXM9		J3KT37
		UBA6			UBA6
		AP3B1	833		AP3B1
		CYR61			CYR61
		LIN7A			LIN7A
		HGS			HGS
		XPO1			XPO1
		ARK72			ARK72
		AT8B1			AT8B1
		AP1G1			AP1G1
		LANC1			LANC1
		NRP2			NRP2
		HNRPQ			HNRPQ
		DYSF			DYSF
		TSN9			TSN9
		FLOT1			FLOT1
		VAMP5			VAMP5
		IPO7			IPO7
		EGFR			EGFR
		SHBG			SHBG
		GDN			GDN
		TPM1			TPM1
		RO60			RO60
		HPLN1			HPLN1
		K2C3			K2C3
		CO6A3			CO6A3
		LAMP2			LAMP2
		ACPH			ACPH
		PVR			PVR
		CASPE			CASPE
		S10AB			S10AB
		LIS1			LIS1
		VDAC2			VDAC2
		RL5			RL5
		MRP			MRP
		BCAM			BCAM
		UBP14			UBP14
		AT12A			AT12A
		DEST			DEST
		RL27			RL27
		RS15A			RS15A
		RL11			RL11
		VAMP2			VAMP2
		ACTC			ACTC
		TBA1B			TBA1B
		CSK21			CSK21
		PA1B2			PA1B2
		SHPS1			SHPS1
		VIGLN			VIGLN
		RL18			RL18
		SCRN1			SCRN1
		PAK2			PAK2
		S39A6			S39A6
		ROCK1			ROCK1
		DPYS			DPYS
		I5P1			I5P1
		RB11B			RB11B
		QORX			QORX
		HS905			HS905
		TENS3			TENS3
		LHPL2			LHPL2
		EIF3M			EIF3M
		DCNL3			DCNL3
		S43A3			S43A3
		SYNE1			SYNE1
		TET1			TET1
		LPP			LPP
		LFG3			LFG3
		EXOC4			EXOC4
		LRC59			LRC59
		ISOC1			ISOC1
		F125A			F125A
		ZN462			ZN462
		S10AD			S10AD
		COR1B			COR1B
		JAM3			JAM3
		UBXN6			UBXN6
		TTYH3			TTYH3
		RAB1B			RAB1B
		ITFG3			ITFG3
		TXNIP			TXNIP
		DOCK5			DOCK5
		GLOD4			GLOD4
		NIT2			NIT2
		DD19A			DD19A
		CLDN1			CLDN1
		PCD10			PCD10
		GRHPR			GRHPR
		DBNL			DBNL
		RAB21			RAB21
		LOXL2			LOXL2
		PDXK			PDXK
		ARPC5			ARPC5
		CAH12			CAH12
		AL1A2			AL1A2
		SC31A			SC31A
		OTC			OTC
		RASK			RASK
		K2C6B			K2C6B
		ARLY			ARLY
		RPN2			RPN2
		S10A8			S10A8
		K6PF			K6PF
		FGF2			FGF2
		TFPI1			TFPI1
		PEPD			PEPD
		MYL6B			MYL6B
		ALDR			ALDR
		UCHL3			UCHL3
		DBPA			DBPA
		KAPCA			KAPCA
		ENPP1			ENPP1
		ATPA			ATPA
		RL13			RL13
		KPYR			KPYR
		GPC1			GPC1
		RS10			RS10
		CAZA2			CAZA2
		CD151			CD151
		HINT1			HINT1
		CAD11			CAD11
		IF6			IF6
		MTPN			MTPN
		RS3A			RS3A
		PRS4			PRS4
		RS18			RS18
		RL23			RL23
		RL24			RL24
		ARF5			ARF5
		FKBP4			FKBP4
		TWF1			TWF1
		ADAM9			ADAM9
		MPP2			MPP2
		DPYL1			DPYL1
		GP176			GP176
		DREB			DREB
		DECR			DECR
		IF2GL			IF2GL
		ACTBL			ACTBL
		FSIP2			FSIP2
		RAB12			RAB12
		MYCT1			MYCT1
		ESAM			ESAM
		PANX1			PANX1
		CNN2			CNN2
		CSN8			CSN8
		TXD17			TXD17
		FA49A			FA49A
		SAR1A			SAR1A
		SIAS			SIAS
		PLS3			PLS3
		LIN7C			LIN7C
		NTRI			NTRI
		SC5A6			SC5A6
		DRG1			DRG1
		LIPE			LIPE
		E7EN19			E7EN19
		CERU			CERU
		SYEP			SYEP
		HCK			HCK
		FBLN1			FBLN1
		ECHM			ECHM
		TIMP3			TIMP3
		VATE1			VATE1
		ACTY			ACTY
		RS20			RS20
		NTF2			NTF2
		RL10A			RL10A
		FABP5			FABP5
		ACVR1			ACVR1
		IPYR			IPYR
		ARI4B			ARI4B
		ZC3HD			ZC3HD
		NIPBL			NIPBL
		LRC17			LRC17
		C99L2			C99L2
		EVPL			EVPL
		CUL5			CUL5
		PTN23			PTN23
		E41L1			E41L1
		TR10D			TR10D
		NUDT5			NUDT5
		CHMP3			CHMP3
		HEBP2			HEBP2
		S12A7			S12A7
		EIF3F			EIF3F
		DDAH1			DDAH1
		ACSL3			ACSL3
		HPTR			HPTR
		UROK			UROK
		RASN			RASN
		IGKC			IGKC
		RLA1			RLA1
		TPM2			TPM2
		RL17			RL17
		PIMT			PIMT
		PPAC			PPAC
		PSA2			PSA2
		PSB5			PSB5
		EF1D			EF1D
		COPB2			COPB2
		GGT5			GGT5
		AK1C3			AK1C3
		RANG			RANG
		RAGP1			RAGP1
		PSB2			PSB2
		BCAT1			BCAT1
		SEC13			SEC13
		RAB5B			RAB5B
		TBB4B			TBB4B
		MPCP			MPCP
		PSME1			PSME1
		CD47			CD47
		G3BP1			G3BP1
		S12A1			S12A1
		ARHG7			ARHG7
		AINX			AINX
		GRDN			GRDN
		TENC1			TENC1
		STEA3			STEA3
		SRGP1			SRGP1
		LIX1L			LIX1L
		CCYL1			CCYL1
		GTR14			GTR14
		S20A1			S20A1
		TCPW			TCPW
		MALD3			MALD3
		EXOC2			EXOC2
		SEM3C			SEM3C
		CSN4			CSN4
		ITPA			ITPA
		ACSS3			ACSS3
		VTA1			VTA1
		RIC8A			RIC8A
		CC50A			CC50A
		TEN3			TEN3
		ZC3H4			ZC3H4
		COF2			COF2
		TRRAP			TRRAP
		PCDG1			PCDG1
		B1AHL2			B1AHL2
		E9PIE5			E9PIE5
		SYTC2			SYTC2
		DDTL			DDTL
		TPM3L			TPM3L
		YU008			YU008
		IGLL5			IGLL5
		AGRIN			AGRIN
		BT3A3			BT3A3
		LPP3			LPP3
		G3PT			G3PT
		TSN4			TSN4
		SCAM3			SCAM3
		TX1B3			TX1B3
		MUSK			MUSK
		PLS1			PLS1
		CLIC2			CLIC2
		HAIR			HAIR
		SI1L3			SI1L3
		SNX3			SNX3
		AP180			AP180
		DPOLZ			DPOLZ
		CUTA			CUTA
		SH3L1			SH3L1
		LYPA1			LYPA1
		POP7			POP7
		STAM2			STAM2
		KRT36			KRT36
		LYPA2			LYPA2
		AHSA1			AHSA1
		BAG3			BAG3
		AIFM1			AIFM1
		ANT3			ANT3
		AACT			AACT
		CYTA			CYTA
		TGFB1			TGFB1
		INS			INS
		KV302			KV302
		APOA1			APOA1
		VTNC			VTNC
		H2A1B			H2A1B
		ARGI1			ARGI1
		PAI2			PAI2
		PCCA			PCCA
		S10A9			S10A9
		TRY1			TRY1
		MGP			MGP
		LAC2			LAC2
		POTEI			POTEI
		KAP0			KAP0
		PCNA			PCNA
		CO6A2			CO6A2
		PIP			PIP
		IFM1			IFM1
		CC130			CC130
		MIF			MIF
		FPPS			FPPS
		SYDC			SYDC
		1A25			1A25
		K1C15			K1C15
		ITIH2			ITIH2
		NDKB			NDKB
		TGM1			TGM1
		PSA3			PSA3
		ANX13			ANX13
		CD82			CD82
		GSTM2			GSTM2
		HLAF			HLAF
		ILEU			ILEU
		SC6A6			SC6A6
		TRY3			TRY3
		PROF2			PROF2
		RL22			RL22
		HRH1			HRH1
		SCN1A			SCN1A
		TRI23			TRI23
		TALDO			TALDO
		CAPG			CAPG
		STAT3			STAT3
		EAA3			EAA3
		NOP2			NOP2
		NOTC1			NOTC1
		RS5			RS5
		PSB3			PSB3
		ACADV			ACADV
		SPB8			SPB8
		RB27A			RB27A
		DUS3			DUS3
		SPSY			SPSY
		PPP5			PPP5
		DPOG1			DPOG1
		AAKG1			AAKG1
		EPHA5			EPHA5
		GEMI4			GEMI4
		EPIPL			EPIPL
		PSA6			PSA6
		S10AA			S10AA
		GMFB			GMFB
		CSN2			CSN2
		RL15			RL15
		RND3			RND3
		LYSC			LYSC
		B2MG			B2MG
		UFM1			UFM1
		RS14			RS14
		RS13			RS13
		PRS10			PRS10
		RL23A			RL23A
		H4			H4
		RS25			RS25
		RS28			RS28
		RL30			RL30
		RL31			RL31
		RL38			RL38
		TBA4A			TBA4A
		MAP1A			MAP1A
		CRUM1			CRUM1
		AT11A			AT11A
		PIPNA			PIPNA
		AMPD2			AMPD2
		APBA1			APBA1
		CAV1			CAV1
		PLP2			PLP2
		PTN12			PTN12
		DSC1			DSC1
		MERTK			MERTK
		ANK3			ANK3
		TIAM1			TIAM1
		MTAP			MTAP
		AAPK1			AAPK1
		SBP1			SBP1
		PKP1			PKP1
		BLMH			BLMH
		COTL1			COTL1
		DSG2			DSG2
		HS902			HS902
		LTBP1			LTBP1
		SNX17			SNX17
		PA1B3			PA1B3
		RASA2			RASA2
		EPHA7			EPHA7
		CDSN			CDSN
		NHRF2			NHRF2
		PCH2			PCH2
		HERC1			HERC1
		RAB30			RAB30
		UB2V2			UB2V2
		VAMP3			VAMP3
		NEDD8			NEDD8
		SYPL1			SYPL1
		M3K11			M3K11
		THTR			THTR
		DOK7			DOK7
		TXIP1			TXIP1
		SVEP1			SVEP1
		FA98B			FA98B
		CYBR1			CYBR1
		RS26L			RS26L
		PREP			PREP
		KPRP			KPRP
		K2C80			K2C80
		S27A1			S27A1
		FIGL1			FIGL1
		S4A10			S4A10
		NCRP1			NCRP1
		UBP31			UBP31
		NEGR1			NEGR1
		DCXR			DCXR
		RIMS1			RIMS1
		CMYA5			CMYA5
		STX19			STX19
		CC168			CC168
		DBF4B			DBF4B
		NEK11			NEK11
		OR1M1			OR1M1
		OCC1			OCC1
		PANK1			PANK1
		TSK			TSK
		RAB2B			RAB2B
		S38A5			S38A5
		PHLA1			PHLA1
		APBP2			APBP2
		RYR2			RYR2
		KAT2A			KAT2A
		ARHG1			ARHG1
		RAB8B			RAB8B
		RIT1			RIT1
		UBP13			UBP13
		BHMT1			BHMT1
		TP4A1			TP4A1
		ARL8A			ARL8A
		ATG2B			ATG2B
		DYH11			DYH11
		SIPA1			SIPA1
		PGM2			PGM2
		SNX27			SNX27
		CNBD2			CNBD2
		HUTU			HUTU
		PGRP2			PGRP2
		NOX5			NOX5
		H2A1A			H2A1A
		NOTC4			NOTC4
		S1PR3			S1PR3
		ARP5L			ARP5L
		SIN1			SIN1
		PD1L2			PD1L2
		LRRC1			LRRC1
		EFHD1			EFHD1
		UDB28			UDB28
		UACA			UACA
		DNAI2			DNAI2
		CK054			CK054
		CA021			CA021
		BHMT2			BHMT2
		UBE2Z			UBE2Z
		EVA1A			EVA1A
		S52A2			S52A2
		SMUF2			SMUF2
		MYG1			MYG1
		CYBP			CYBP
		LST2			LST2
		EPG5			EPG5
		PCD18			PCD18
		CD248			CD248
		APMAP			APMAP
		TIGAR			TIGAR
		ASH1L			ASH1L
		C42S2			C42S2
		PHP14			PHP14
		KIF15			KIF15
		CKLF6			CKLF6
		KBRS2			KBRS2
		CECR1			CECR1
		HPBP1			HPBP1
		ARP3B			ARP3B
		MRC2			MRC2
		VPS29			VPS29
		SUSD2			SUSD2
		ARMX3			ARMX3
		TKNK			TKNK
		PCYOX			PCYOX
		PFD2			PFD2
		VATH			VATH
		BAG5			BAG5
		HECD1			HECD1
		SNX12			SNX12
		PTPRQ			PTPRQ
		XCT			XCT
		MYH15			MYH15
		CHSP1			CHSP1
		SIT1			SIT1
		PAL4A			PAL4A
		AP4B1			AP4B1
		BZW2			BZW2
		PARP3			PARP3
		PCLO			PCLO
		A6NN80			A6NN80
		B6DY52			B6DY52
		B7Z5H6			B7Z5H6
		B8ZZJ1			B8ZZJ1
		E7EVA0			E7EVA0
		E9PB77			E9PB77
		F5H6C2			F5H6C2
		G5EA09			G5EA09
		H0YA14			H0YA14
		H0YGH8			H0YGH8
		K4DI94			K4DI94
					FAT1
		1.339			URP2
					AL1A3
					SRC8
					PLOD2
					PCCB
					UROM
					PA24A
					PTGIS
					LRIG1
					GPC5B
					AMBP
					PTPRJ
					XPOT
					HNRPK
					M2GD
					EXOC7
					RET4
					K2C7
					SPB9
					ZO1
					RAI14
					TRFM
					1A03
					GSHB
					PACS1
					ARHG2
					EIF3L
					MGRN1
					S14L2
					ENDD1
					RPN1
					ALDOB
					IF4G2
					ROR1
					AHNK2
					DOCK9
					TNIK
					1A23
					GRK6
					SYCC
					STK38
					NHS
					LRSM1
					DCBD1
					GCN1L
					AP1M1
					PVRL3
					PACN3
					KC1G3
					IF2A
					METK2
					TPD54
					CLIC3
					PDIA4
					TNAP3
					CTNA2
					SYVC
					TPM4
					SQSTM
					EIF3A
					CIP4
					MICA1
					PDLI5
					S23A2
					IRK18
					ANM5
					RASM
					DNJA2
					ROCK2
					ZPR1
					GFPT2
					UBR5
					GSHR
					A1AT
					IL1B
					TPM3
					TRBM
					MPRI
					HEM2
					VATB1
					RL7
					DDX6
					RL9
					VGFR2
					PRS7
					RS19
					ARL1
					PTGDS
					UTRO
					ST1A1
					ADK
					CATW
					EIF3E
					PFD3
					GRB2
					CDK17
					PURA
					FLII
					PAK1
					DCTN1
					DOC11
					PEAR1
					LARP1
					DNMBP
					DEN5B
					EXOC8
					TTC40
					PHAR4
					ARFG1
					EHBP1
					MLL3
					NBEA
					TS1R2
					IPO4
					DYH7
					TFG
					AIFM2
					EIF2A
					N2DL1
					S38A1
					SPNS1
					ES8L2
					ARL15
					ABI2
					SYLC
					ZDHC8
					BAIP2
					C170B
					ANO9
					MRP4
					TGFI1
					ADCY3
					SODM
					GPX1
					PPAL
					ACADS
					PSB4
					RL21
					SYQ
					MAOX
					CTR2
					RS15
					STRUM
					CAPR1
					RHEB
					2A5E
					NT5C
					OSMR
					FR8P1
					PLS4
					ANFY1
					TES
					D3K174
					DNM1L
					MYPT1
					EIF3D
					COPT1
					CD14
					MYH6
					ATP4A
					SHC1
					OST48
					GSH0
					EIF3B
					ACY1
					DYN1
					PTGR1
					TNIP1
					SYK
					ITSN1
					PDE12
					KC1AL
					CNNM3
					PSMD1
					METH
					PLEK2
					MAT2B
					RRBP1
					EP15R
					COHA1
					CSN3
					MACF1
					EXC6B
					RTCB
					RBGP1
					GMPPB
					ARVC
					MLL2
					RGS12
					PGRC2
					STX7
					NCOAT
					LPXN
					IF2P
					UBP12
					RHBT3
					ERBB2
					RLA2
					RLA0
					K1C18
					NPM
					PYRG1
					VATB2
					ZA2G
					PYR1
					AL4A1
					BMR1A
					PERI
					PSD7
					THOP1
					RD23A
					VA0D1
					KPCD
					ASPH
					ACACA
					LIPA1
					FCL
					RAB32
					GIT2
					SMAD1
					HCDH
					PPR18
					RB6I2
					PLCD3
					RAI3
					NEK7
					SH3K1
					GMPPA
					IPO9
					RSF1
					NP1L4
					CHM4A
					TB182
					TMM8A
					PEF1
					VPS28
					ASC
					PSD13
					S12A4
					PLAP
					GIT1
					ORN
					E5RI81
					ESYT2
					T131L
					VWA8
					GRD2I
					EFCB5
					XIRP2
					POTEF
					MA13P
					CL070
					F115C
					CB071
					RHG42
					WASH1
					CCL24
					MASP2
					PSD12
					PGRC1
					EXOC5
					PSDE
					NCKP5
					DPYL4
					CTRO
					AP3D1
					TMG1
					ITBP1
					RIOK3
					PSA7
					ZN646
					SPTN2
					TCPR2
					NPC1
					SCAM2
					IMA5
					ZBT7B
					SURF4
					MOT5
					NVL
					MAGB4
					XLRS1
					DC1L2
					LRRT2
					VIP2
					GRID2
					DENR
					TPPC3
					ZN207
					CIKS
					SAHH2
					PLIN1
					FZD6
					CUBN
					ADCY9
					DIAP1
					IMA7
					SNX2
					DIAP2
					NBN
					SLIT1
					CLU
					DJC13
					PHAR2
					CILP1
					TBCA
					TRIM3
					SC22B
					CDC45
					GPC4
					KBL
					SPAG6
					UTP20
					EIF3G
					CIB2
					PRAF3
					TRIO
					CBPD
					RGS20
					AT10B
					SC24D
					ZN432
					FRYL
					GLSK
					S1PR2
					LETM1
					PPN
					FMNL
					ASML
					WIZ
					NDST3
					SDPR
					GNA14
					FBLN4
					DYR
					CAH1
					LDLR
					EGF
					IFNA2
					HV105
					PIGR
					IGHM
					CO2A1
					LMNA
					APOC3
					FIBA
					APOD
					IPSP
					ISG15
					AT5G1
					AP2A
					KPCB
					CO5A2
					PKHD1
					CD7
					LOX5
					FREM3
					CO4A
					S31C1
					LYAG
					POK10
					MAP2
					SPTB1
					NFH
					FA5
					IL7
					P4HA1
					ETFA
					GLU2B
					EPB42
					AT2A2
					HSP76
					RHOQ
					KPCA
					LFA3
					NUCL
					NFKB1
					TYPH
					RAB3A
					RAB4A
					MPRD
					ICAL
					NF1
					MUTA
					CCNO
					AMPD1
					PGH1
					CRCM
					EF1B
					DNAS1
					PAR1
					PSA1
					S10A4
					PDE4A
					PSA5
					CD34
					TPP2
					ERP29
					PRDX3
					HNRH1
					MC5R
					ERD22
					GLYC
					MPI
					CXA5
					TNR3
					GPX4
					AN32A
					CUX1
					CAP2
					UBA7
					SYIC
					FRK
					LPPRC
					THIM
					HD
					SSRA
					KI2L2
					RL27A
					NEST
					KC1A
					NRAM2
					FNTA
					ARRB1
					EFTU
					CENPF
					PPM1F
					TMEDA
					RBP2
					GSK3B
					LHX2
					RL14
					PLXA3
					KS6A3
					ADCY7
					IMA1
					KIF11
					VAV2
					EFNB2
					NUDT6
					CATC
					EPHB1
					KAD2
					S12A3
					PSMD4
					DRG2
					CADH6
					BID
					GBG2
					AP1S1
					TSN5
					PP1B
					RS23
					RS29
					SMD1
					UB2D2
					RS24
					RS26
					GAK12
					SERB
					PI42B
					KC1G2
					PRKDC
					RL19
					CP4F8
					AT8B2
					CDK16
					CNTN2
					MMSA
					CO7A1
					MLL1
					IF4G1
					KPCT
					WIT1
					C1QBP
					ECHP
					M4K2
					MYO1E
					NPRL3
					SEC20
					CSN1
					TADBP
					PAPP1
					KGP2
					PABP4
					SNTB2
					MYO9B
					VPP3
					CUL4B
					DAG1
					GGTL2
					SEM3A
					IRF3
					PSME4
					AT7L3
					PSMD6
					IF4H
					PDK2
					2A5B
					ELOC
					DLGP5
					RYR3
					KS6A1
					RGN
					TESK1
					TRIP6
					MARE1
					SMAD2
					SCN9A
					ZFHX3
					GRIK4
					PKN2
					TBR1
					MA2A1
					DGKD
					T132A
					CL16A
					K1109
					ZN630
					KBTB5
					FR1L6
					ATHL1
					GFOD2
					UAP1L
					CHD9
					K2C71
					TB10B
					IQCC
					PLCH1
					FWCH1
					PHLA2
					XKR6
					ZN311
					AKAP4
					CD158
					FREM2
					FKB15
					NHRF3
					FRY
					STRP1
					CE350
					SYDE2
					GARL3
					IQEC1
					CAPR2
					MED27
					PLBL1
					CNNM4
					INT5
					TM154
					NCEH1
					ATRAP
					ANR11
					PI16
					IGS10
					THADA
					YA014
					YJ005
					YK025
					ACD11
					UBP34
					KCTD1
					LCA10
					CENPQ
					RRAGA
					MICA3
					CAD24
					ZFHX4
					PHLB1
					IQGA3
					HOGA1
					DDX42
					K0528
					TMPS6
					CLC10
					PLD3
					DYH10
					WDR75
					SULF2
					TEX11
					F186B
					ZN101
					XRN1
					ABCA6
					ZN664
					MPP5
					T132C
					TXND3
					LRC71
					ZN713
					ANR44
					F133A
					EIF1A
					FEAS1
					AT11C
					SYT14
					KY
					PAIRB
					KCNH5
					DYHC2
					ZN740
					SPAT4
					OR4M2
					MCFD2
					SHKB1
					PI42C
					TRPM4
					ATS15
					ZN418
					DUS19
					TF3C2
					SNX33
					MITD1
					LMO7
					SYNE2
					MUC16
					ASB15
					IRGQ
					S14L1
					DYRK2
					STAM1
					RAD50
					PRG4
					SCAM4
					H2B1A
					COAC
					GCC1
					RCN3
					WDR67
					T3HPD
					EDC3
					WDR89
					T176A
					FXL20
					MAP6
					MARK4
					PGRP4
					GBP5
					NED4L
					PLIN4
					ALS2
					XPO6
					NUDC1
					HMCN1
					SEBP2
					MMS19
					ACOX2
					K1C12
					EIF3C
					TTC1
					RGPD5
					LYST
					SMAD5
					ACON
					MYD88
					AKAP9
					CND3
					NUD12
					BUD13
[truncated: 884 more rows]
