# Supplementary material for: Cardiac Progenitor Cell Exosomal miR-935 Protects against Oxidative Stress
Source: Cells. 2023 Sep 18;12(18):2300. doi: 10.3390/cells12182300 (PMC10528297; doi:10.3390/cells12182300)
Supplement: Supplementary file 1 [file cells-12-02300-s001.zip › Table S4. CellsvsExosome_miRNA (CPC3).xlsx]

## Sheet: Exosomes CPC3_miRBaseHs
gene_id mirna	cells counts	exosomes count	NormCells	NormExo	InEx	InCell
hsa-miR-22-3p	315959	0	7.08921e+06	0	0	1
hsa-miR-191-5p	80997	0	1.81734e+06	0	0	1
hsa-miR-126-5p	35617	0	799143	0	0	1
hsa-miR-92b-3p	6551	0	146986	0	0	1
hsa-miR-320a	4616.17	0	103574	0	0	1
hsa-miR-93-5p	2476	0	55554.3	0	0	1
hsa-miR-501-3p	2123.03	0	47634.7	0	0	1
hsa-miR-31-5p	2097	0	47050.7	0	0	1
hsa-miR-432-5p	1547.92	0	34730.9	0	0	1
hsa-miR-431-5p	593	0	13305.2	0	0	1
hsa-miR-369-3p	450	0	10096.7	0	0	1
hsa-miR-323a-3p	385	0	8638.29	0	0	1
hsa-miR-369-5p	379	0	8503.67	0	0	1
hsa-miR-132-3p	218	0	4891.29	0	0	1
hsa-miR-425-5p	207	0	4644.48	0	0	1
hsa-miR-182-5p	191	0	4285.49	0	0	1
hsa-miR-324-5p	105	0	2355.9	0	0	1
hsa-miR-31-3p	87	0	1952.03	0	0	1
hsa-miR-127-5p	71	0	1593.04	0	0	1
hsa-miR-7-1-3p	60	0	1346.23	0	0	1
hsa-miR-431-3p	52	0	1166.73	0	0	1
hsa-miR-452-5p	48	0	1076.98	0	0	1
hsa-miR-454-5p	48	0	1076.98	0	0	1
hsa-miR-362-5p	44	0	987.234	0	0	1
hsa-miR-451a	44	0	987.234	0	0	1
hsa-miR-3613-3p	34	0	762.862	0	0	1
hsa-miR-92a-1-5p	32	0	717.988	0	0	1
hsa-miR-122-5p	28.65	0	642.824	0	0	1
hsa-miR-425-3p	27	0	605.802	0	0	1
hsa-miR-3613-5p	25	0	560.928	0	0	1
hsa-miR-32-5p	24	0	538.491	0	0	1
hsa-miR-362-3p	24	0	538.491	0	0	1
hsa-miR-320b	23.61	0	529.741	0	0	1
hsa-miR-1226-5p	23	0	516.054	0	0	1
hsa-miR-744-3p	21.99	0	493.392	0	0	1
hsa-miR-212-5p	19	0	426.305	0	0	1
hsa-miR-132-5p	18	0	403.868	0	0	1
hsa-miR-224-3p	18	0	403.868	0	0	1
hsa-miR-501-5p	17.93	0	402.298	0	0	1
hsa-miR-191-3p	16	0	358.994	0	0	1
hsa-miR-3158-3p	16	0	358.994	0	0	1
hsa-miR-3152-5p	14	0	314.12	0	0	1
hsa-miR-1262	12	0	269.246	0	0	1
hsa-miR-93-3p	11	0	246.808	0	0	1
hsa-miR-5096	9.43	0	211.582	0	0	0
hsa-miR-25-5p	9	0	201.934	0	0	0
hsa-miR-144-3p	8	0	179.497	0	0	0
hsa-miR-323a-5p	8	0	179.497	0	0	0
hsa-miR-940	8	0	179.497	0	0	0
hsa-miR-432-3p	7	0	157.06	0	0	0
hsa-miR-2964a-5p	6	0	134.623	0	0	0
hsa-miR-4745-5p	6	0	134.623	0	0	0
hsa-miR-5094	6	0	134.623	0	0	0
hsa-miR-1273e	5.97	0	133.95	0	0	0
hsa-miR-150-5p	5	0	112.186	0	0	0
hsa-miR-197-5p	5	0	112.186	0	0	0
hsa-miR-2114-5p	5	0	112.186	0	0	0
hsa-miR-3129-5p	5	0	112.186	0	0	0
hsa-miR-3136-5p	5	0	112.186	0	0	0
hsa-miR-548a-5p	5	0	112.186	0	0	0
hsa-miR-15a-3p	4	0	89.7485	0	0	0
hsa-miR-3154	4	0	89.7485	0	0	0
hsa-miR-3163	4	0	89.7485	0	0	0
hsa-miR-3199	4	0	89.7485	0	0	0
hsa-miR-324-3p	4	0	89.7485	0	0	0
hsa-miR-4423-5p	4	0	89.7485	0	0	0
hsa-miR-4511	4	0	89.7485	0	0	0
hsa-miR-1285-5p	3.8	0	85.2611	0	0	0
hsa-miR-548j	3.05	0	68.4332	0	0	0
hsa-miR-1252	3	0	67.3114	0	0	0
hsa-miR-1269a	3	0	67.3114	0	0	0
hsa-miR-1276	3	0	67.3114	0	0	0
hsa-miR-139-3p	3	0	67.3114	0	0	0
hsa-miR-3117-3p	3	0	67.3114	0	0	0
hsa-miR-3126-5p	3	0	67.3114	0	0	0
hsa-miR-3615	3	0	67.3114	0	0	0
hsa-miR-3939	3	0	67.3114	0	0	0
hsa-miR-4421	3	0	67.3114	0	0	0
hsa-miR-4524a-3p	3	0	67.3114	0	0	0
hsa-miR-4721	3	0	67.3114	0	0	0
hsa-miR-483-5p	3	0	67.3114	0	0	0
hsa-miR-544a	3	0	67.3114	0	0	0
hsa-miR-5685	3	0	67.3114	0	0	0
hsa-miR-570-3p	3	0	67.3114	0	0	0
hsa-miR-636	3	0	67.3114	0	0	0
hsa-miR-5100	2.99	0	67.087	0	0	0
hsa-miR-129-5p	2.98	0	66.8626	0	0	0
hsa-miR-1193	2	0	44.8743	0	0	0
hsa-miR-1278	2	0	44.8743	0	0	0
hsa-miR-20a-3p	2	0	44.8743	0	0	0
hsa-miR-216b	2	0	44.8743	0	0	0
hsa-miR-3121-3p	2	0	44.8743	0	0	0
hsa-miR-3143	2	0	44.8743	0	0	0
hsa-miR-3173-3p	2	0	44.8743	0	0	0
hsa-miR-3187-3p	2	0	44.8743	0	0	0
hsa-miR-3619-3p	2	0	44.8743	0	0	0
hsa-miR-3691-5p	2	0	44.8743	0	0	0
hsa-miR-3944-3p	2	0	44.8743	0	0	0
hsa-miR-4661-3p	2	0	44.8743	0	0	0
hsa-miR-4676-3p	2	0	44.8743	0	0	0
hsa-miR-4709-5p	2	0	44.8743	0	0	0
hsa-miR-4762-5p	2	0	44.8743	0	0	0
hsa-miR-1292	1.99	0	44.6499	0	0	0
hsa-miR-4482-3p	1.99	0	44.6499	0	0	0
hsa-miR-643	1.95	0	43.7524	0	0	0
hsa-miR-219-5p	1.85	0	41.5087	0	0	0
hsa-miR-1273g-3p	1.82	0	40.8356	0	0	0
hsa-miR-3688-5p	1.69	0	37.9187	0	0	0
hsa-miR-3688-3p	1.31	0	29.3926	0	0	0
hsa-miR-1245a	1	0	22.4371	0	0	0
hsa-miR-1273c	1	0	22.4371	0	0	0
hsa-miR-1286	1	0	22.4371	0	0	0
hsa-miR-144-5p	1	0	22.4371	0	0	0
hsa-miR-1468	1	0	22.4371	0	0	0
hsa-miR-16-1-3p	1	0	22.4371	0	0	0
hsa-miR-190b	1	0	22.4371	0	0	0
hsa-miR-2277-3p	1	0	22.4371	0	0	0
hsa-miR-2682-3p	1	0	22.4371	0	0	0
hsa-miR-3065-5p	1	0	22.4371	0	0	0
hsa-miR-3133	1	0	22.4371	0	0	0
hsa-miR-3140-5p	1	0	22.4371	0	0	0
hsa-miR-3145-3p	1	0	22.4371	0	0	0
hsa-miR-3150a-5p	1	0	22.4371	0	0	0
hsa-miR-3157-3p	1	0	22.4371	0	0	0
hsa-miR-3159	1	0	22.4371	0	0	0
hsa-miR-3167	1	0	22.4371	0	0	0
hsa-miR-3183	1	0	22.4371	0	0	0
hsa-miR-3190-3p	1	0	22.4371	0	0	0
hsa-miR-33b-5p	1	0	22.4371	0	0	0
hsa-miR-3591-5p	1	0	22.4371	0	0	0
hsa-miR-3664-3p	1	0	22.4371	0	0	0
hsa-miR-3675-5p	1	0	22.4371	0	0	0
hsa-miR-3679-3p	1	0	22.4371	0	0	0
hsa-miR-3684	1	0	22.4371	0	0	0
hsa-miR-3685	1	0	22.4371	0	0	0
hsa-miR-373-3p	1	0	22.4371	0	0	0
hsa-miR-4429	1	0	22.4371	0	0	0
hsa-miR-4469	1	0	22.4371	0	0	0
hsa-miR-4485	1	0	22.4371	0	0	0
hsa-miR-4638-3p	1	0	22.4371	0	0	0
hsa-miR-4664-3p	1	0	22.4371	0	0	0
hsa-miR-4667-5p	1	0	22.4371	0	0	0
hsa-miR-4679	1	0	22.4371	0	0	0
hsa-miR-4682	1	0	22.4371	0	0	0
hsa-miR-4709-3p	1	0	22.4371	0	0	0
hsa-miR-4714-3p	1	0	22.4371	0	0	0
hsa-miR-4730	1	0	22.4371	0	0	0
hsa-miR-4733-3p	1	0	22.4371	0	0	0
hsa-miR-4755-3p	1	0	22.4371	0	0	0
hsa-miR-4767	1	0	22.4371	0	0	0
hsa-miR-4769-3p	1	0	22.4371	0	0	0
hsa-miR-4799-5p	1	0	22.4371	0	0	0
hsa-miR-4802-3p	1	0	22.4371	0	0	0
hsa-miR-489	1	0	22.4371	0	0	0
hsa-miR-545-3p	1	0	22.4371	0	0	0
hsa-miR-548ao-3p	1	0	22.4371	0	0	0
hsa-miR-548p	1	0	22.4371	0	0	0
hsa-miR-556-5p	1	0	22.4371	0	0	0
hsa-miR-5582-3p	1	0	22.4371	0	0	0
hsa-miR-5692c	1	0	22.4371	0	0	0
hsa-miR-5706	1	0	22.4371	0	0	0
hsa-miR-597	1	0	22.4371	0	0	0
hsa-miR-652-5p	1	0	22.4371	0	0	0
hsa-miR-659-3p	1	0	22.4371	0	0	0
hsa-miR-766-5p	1	0	22.4371	0	0	0
hsa-miR-95	1	0	22.4371	0	0	0
hsa-miR-4726-5p	0.99	0	22.2128	0	0	0
hsa-miR-412	0.97	0	21.764	0	0	0
hsa-miR-3192	0.93	0	20.8665	0	0	0
hsa-miR-4520a-3p	0.58	0	13.0135	0	0	0
hsa-miR-548ai	0.5	0	11.2186	0	0	0
hsa-miR-570-5p	0.5	0	11.2186	0	0	0
hsa-miR-3591-3p	0.35	0	7.85299	0	0	0
hsa-miR-3689a-5p	0.33	0	7.40425	0	0	0
hsa-miR-3689b-5p	0.33	0	7.40425	0	0	0
hsa-miR-3689e	0.33	0	7.40425	0	0	0
hsa-miR-4649-3p	0.18	0	4.03868	0	0	0
hsa-miR-105-3p	0	0	0	0	0	0
hsa-miR-105-5p	0	0	0	0	0	0
hsa-miR-106a-3p	0	0	0	0	0	0
hsa-miR-106a-5p	0	0	0	0	0	0
hsa-miR-1178	0	0	0	0	0	0
hsa-miR-1179	0	0	0	0	0	0
hsa-miR-1181	0	0	0	0	0	0
hsa-miR-1182	0	0	0	0	0	0
hsa-miR-1183	0	0	0	0	0	0
hsa-miR-1184	0	0	0	0	0	0
hsa-miR-1200	0	0	0	0	0	0
hsa-miR-1202	0	0	0	0	0	0
hsa-miR-1203	0	0	0	0	0	0
hsa-miR-1204	0	0	0	0	0	0
hsa-miR-1205	0	0	0	0	0	0
hsa-miR-1206	0	0	0	0	0	0
hsa-miR-1207-3p	0	0	0	0	0	0
hsa-miR-1207-5p	0	0	0	0	0	0
hsa-miR-1208	0	0	0	0	0	0
hsa-miR-122-3p	0	0	0	0	0	0
hsa-miR-1224-5p	0	0	0	0	0	0
hsa-miR-1225-3p	0	0	0	0	0	0
hsa-miR-1225-5p	0	0	0	0	0	0
hsa-miR-1227	0	0	0	0	0	0
hsa-miR-1229	0	0	0	0	0	0
hsa-miR-1231	0	0	0	0	0	0
hsa-miR-1233	0	0	0	0	0	0
hsa-miR-1234	0	0	0	0	0	0
hsa-miR-1236	0	0	0	0	0	0
hsa-miR-1237	0	0	0	0	0	0
hsa-miR-1238	0	0	0	0	0	0
hsa-miR-1243	0	0	0	0	0	0
hsa-miR-124-3p	0	0	0	0	0	0
hsa-miR-1245b-5p	0	0	0	0	0	0
hsa-miR-124-5p	0	0	0	0	0	0
hsa-miR-1246	0	0	0	0	0	0
hsa-miR-1247-3p	0	0	0	0	0	0
hsa-miR-1247-5p	0	0	0	0	0	0
hsa-miR-1248	0	0	0	0	0	0
hsa-miR-1250	0	0	0	0	0	0
hsa-miR-1251	0	0	0	0	0	0
hsa-miR-1253	0	0	0	0	0	0
hsa-miR-1255b-2-3p	0	0	0	0	0	0
hsa-miR-1255b-5p	0	0	0	0	0	0
hsa-miR-1256	0	0	0	0	0	0
hsa-miR-1257	0	0	0	0	0	0
hsa-miR-1258	0	0	0	0	0	0
hsa-miR-1261	0	0	0	0	0	0
hsa-miR-1263	0	0	0	0	0	0
hsa-miR-1264	0	0	0	0	0	0
hsa-miR-1265	0	0	0	0	0	0
hsa-miR-1266	0	0	0	0	0	0
hsa-miR-1267	0	0	0	0	0	0
hsa-miR-1268a	0	0	0	0	0	0
hsa-miR-1269b	0	0	0	0	0	0
hsa-miR-1273g-5p	0	0	0	0	0	0
hsa-miR-1275	0	0	0	0	0	0
hsa-miR-1279	0	0	0	0	0	0
hsa-miR-1280	0	0	0	0	0	0
hsa-miR-1281	0	0	0	0	0	0
hsa-miR-1282	0	0	0	0	0	0
hsa-miR-1283	0	0	0	0	0	0
hsa-miR-1288	0	0	0	0	0	0
hsa-miR-1289	0	0	0	0	0	0
hsa-miR-129-2-3p	0	0	0	0	0	0
hsa-miR-1295b-3p	0	0	0	0	0	0
hsa-miR-1295b-5p	0	0	0	0	0	0
hsa-miR-1297	0	0	0	0	0	0
hsa-miR-1298	0	0	0	0	0	0
hsa-miR-1305	0	0	0	0	0	0
hsa-miR-1306-3p	0	0	0	0	0	0
hsa-miR-130a-5p	0	0	0	0	0	0
hsa-miR-1323	0	0	0	0	0	0
hsa-miR-1324	0	0	0	0	0	0
hsa-miR-133a	0	0	0	0	0	0
hsa-miR-133b	0	0	0	0	0	0
hsa-miR-135a-3p	0	0	0	0	0	0
hsa-miR-135a-5p	0	0	0	0	0	0
hsa-miR-135b-3p	0	0	0	0	0	0
hsa-miR-138-2-3p	0	0	0	0	0	0
hsa-miR-1469	0	0	0	0	0	0
hsa-miR-1470	0	0	0	0	0	0
hsa-miR-1471	0	0	0	0	0	0
hsa-miR-147a	0	0	0	0	0	0
hsa-miR-149-3p	0	0	0	0	0	0
hsa-miR-150-3p	0	0	0	0	0	0
hsa-miR-151b	0	0	0	0	0	0
hsa-miR-1537	0	0	0	0	0	0
hsa-miR-1538	0	0	0	0	0	0
hsa-miR-1539	0	0	0	0	0	0
hsa-miR-155-3p	0	0	0	0	0	0
hsa-miR-1587	0	0	0	0	0	0
hsa-miR-182-3p	0	0	0	0	0	0
hsa-miR-1827	0	0	0	0	0	0
hsa-miR-183-3p	0	0	0	0	0	0
hsa-miR-187-5p	0	0	0	0	0	0
hsa-miR-18b-3p	0	0	0	0	0	0
hsa-miR-18b-5p	0	0	0	0	0	0
hsa-miR-1909-3p	0	0	0	0	0	0
hsa-miR-1909-5p	0	0	0	0	0	0
hsa-miR-1912	0	0	0	0	0	0
hsa-miR-1913	0	0	0	0	0	0
hsa-miR-1914-3p	0	0	0	0	0	0
hsa-miR-1914-5p	0	0	0	0	0	0
hsa-miR-1915-3p	0	0	0	0	0	0
hsa-miR-1915-5p	0	0	0	0	0	0
hsa-miR-192-3p	0	0	0	0	0	0
hsa-miR-194-3p	0	0	0	0	0	0
hsa-miR-196a-3p	0	0	0	0	0	0
hsa-miR-196b-3p	0	0	0	0	0	0
hsa-miR-1976	0	0	0	0	0	0
hsa-miR-198	0	0	0	0	0	0
hsa-miR-19b-2-5p	0	0	0	0	0	0
hsa-miR-200a-5p	0	0	0	0	0	0
hsa-miR-200b-5p	0	0	0	0	0	0
hsa-miR-200c-5p	0	0	0	0	0	0
hsa-miR-202-3p	0	0	0	0	0	0
hsa-miR-202-5p	0	0	0	0	0	0
hsa-miR-203	0	0	0	0	0	0
hsa-miR-204-3p	0	0	0	0	0	0
hsa-miR-2052	0	0	0	0	0	0
hsa-miR-2053	0	0	0	0	0	0
hsa-miR-205-3p	0	0	0	0	0	0
hsa-miR-2054	0	0	0	0	0	0
hsa-miR-205-5p	0	0	0	0	0	0
hsa-miR-206	0	0	0	0	0	0
hsa-miR-208a	0	0	0	0	0	0
hsa-miR-208b	0	0	0	0	0	0
hsa-miR-20b-3p	0	0	0	0	0	0
hsa-miR-20b-5p	0	0	0	0	0	0
hsa-miR-211-3p	0	0	0	0	0	0
hsa-miR-2114-3p	0	0	0	0	0	0
hsa-miR-2115-3p	0	0	0	0	0	0
hsa-miR-2116-5p	0	0	0	0	0	0
hsa-miR-217	0	0	0	0	0	0
hsa-miR-218-1-3p	0	0	0	0	0	0
hsa-miR-218-2-3p	0	0	0	0	0	0
hsa-miR-219-2-3p	0	0	0	0	0	0
hsa-miR-2276	0	0	0	0	0	0
hsa-miR-2278	0	0	0	0	0	0
hsa-miR-2392	0	0	0	0	0	0
hsa-miR-2467-3p	0	0	0	0	0	0
hsa-miR-2681-3p	0	0	0	0	0	0
hsa-miR-2681-5p	0	0	0	0	0	0
hsa-miR-2861	0	0	0	0	0	0
hsa-miR-2909	0	0	0	0	0	0
hsa-miR-297	0	0	0	0	0	0
hsa-miR-298	0	0	0	0	0	0
hsa-miR-29b-2-5p	0	0	0	0	0	0
hsa-miR-300	0	0	0	0	0	0
hsa-miR-302a-5p	0	0	0	0	0	0
hsa-miR-302b-5p	0	0	0	0	0	0
hsa-miR-302c-5p	0	0	0	0	0	0
hsa-miR-302d-5p	0	0	0	0	0	0
hsa-miR-302e	0	0	0	0	0	0
hsa-miR-302f	0	0	0	0	0	0
hsa-miR-3119	0	0	0	0	0	0
hsa-miR-3120-3p	0	0	0	0	0	0
hsa-miR-3120-5p	0	0	0	0	0	0
hsa-miR-3121-5p	0	0	0	0	0	0
hsa-miR-3122	0	0	0	0	0	0
hsa-miR-3123	0	0	0	0	0	0
hsa-miR-3124-3p	0	0	0	0	0	0
hsa-miR-3124-5p	0	0	0	0	0	0
hsa-miR-3125	0	0	0	0	0	0
hsa-miR-3126-3p	0	0	0	0	0	0
hsa-miR-3127-3p	0	0	0	0	0	0
hsa-miR-3132	0	0	0	0	0	0
hsa-miR-3134	0	0	0	0	0	0
hsa-miR-3135a	0	0	0	0	0	0
hsa-miR-3135b	0	0	0	0	0	0
hsa-miR-3136-3p	0	0	0	0	0	0
hsa-miR-3137	0	0	0	0	0	0
hsa-miR-3139	0	0	0	0	0	0
hsa-miR-3141	0	0	0	0	0	0
hsa-miR-3142	0	0	0	0	0	0
hsa-miR-3144-5p	0	0	0	0	0	0
hsa-miR-3146	0	0	0	0	0	0
hsa-miR-3147	0	0	0	0	0	0
hsa-miR-3148	0	0	0	0	0	0
hsa-miR-3149	0	0	0	0	0	0
hsa-miR-3150a-3p	0	0	0	0	0	0
hsa-miR-3150b-3p	0	0	0	0	0	0
hsa-miR-3150b-5p	0	0	0	0	0	0
hsa-miR-3151	0	0	0	0	0	0
hsa-miR-3152-3p	0	0	0	0	0	0
hsa-miR-3155b	0	0	0	0	0	0
hsa-miR-3156-3p	0	0	0	0	0	0
hsa-miR-3156-5p	0	0	0	0	0	0
hsa-miR-3160-5p	0	0	0	0	0	0
hsa-miR-3161	0	0	0	0	0	0
hsa-miR-3162-3p	0	0	0	0	0	0
hsa-miR-3162-5p	0	0	0	0	0	0
hsa-miR-3164	0	0	0	0	0	0
hsa-miR-3165	0	0	0	0	0	0
hsa-miR-3166	0	0	0	0	0	0
hsa-miR-3168	0	0	0	0	0	0
hsa-miR-3169	0	0	0	0	0	0
hsa-miR-3170	0	0	0	0	0	0
hsa-miR-3171	0	0	0	0	0	0
hsa-miR-3176	0	0	0	0	0	0
hsa-miR-3177-5p	0	0	0	0	0	0
hsa-miR-3178	0	0	0	0	0	0
hsa-miR-3179	0	0	0	0	0	0
hsa-miR-3180	0	0	0	0	0	0
hsa-miR-3181	0	0	0	0	0	0
hsa-miR-3182	0	0	0	0	0	0
hsa-miR-3185	0	0	0	0	0	0
hsa-miR-3186-3p	0	0	0	0	0	0
hsa-miR-3186-5p	0	0	0	0	0	0
hsa-miR-3187-5p	0	0	0	0	0	0
hsa-miR-3188	0	0	0	0	0	0
hsa-miR-3189-3p	0	0	0	0	0	0
hsa-miR-3190-5p	0	0	0	0	0	0
hsa-miR-3191-3p	0	0	0	0	0	0
hsa-miR-3193	0	0	0	0	0	0
hsa-miR-3194-3p	0	0	0	0	0	0
hsa-miR-3194-5p	0	0	0	0	0	0
hsa-miR-3195	0	0	0	0	0	0
hsa-miR-3196	0	0	0	0	0	0
hsa-miR-3197	0	0	0	0	0	0
hsa-miR-3198	0	0	0	0	0	0
hsa-miR-3201	0	0	0	0	0	0
hsa-miR-3202	0	0	0	0	0	0
hsa-miR-338-3p	0	0	0	0	0	0
hsa-miR-345-3p	0	0	0	0	0	0
hsa-miR-346	0	0	0	0	0	0
hsa-miR-34b-3p	0	0	0	0	0	0
hsa-miR-34b-5p	0	0	0	0	0	0
hsa-miR-3545-3p	0	0	0	0	0	0
hsa-miR-3545-5p	0	0	0	0	0	0
hsa-miR-3606	0	0	0	0	0	0
hsa-miR-3607-5p	0	0	0	0	0	0
hsa-miR-3612	0	0	0	0	0	0
hsa-miR-3614-5p	0	0	0	0	0	0
hsa-miR-3616-3p	0	0	0	0	0	0
hsa-miR-3616-5p	0	0	0	0	0	0
hsa-miR-3617	0	0	0	0	0	0
hsa-miR-3618	0	0	0	0	0	0
hsa-miR-3622a-3p	0	0	0	0	0	0
hsa-miR-3622a-5p	0	0	0	0	0	0
hsa-miR-3622b-3p	0	0	0	0	0	0
hsa-miR-3622b-5p	0	0	0	0	0	0
hsa-miR-363-3p	0	0	0	0	0	0
hsa-miR-363-5p	0	0	0	0	0	0
hsa-miR-3646	0	0	0	0	0	0
hsa-miR-3648	0	0	0	0	0	0
hsa-miR-3649	0	0	0	0	0	0
hsa-miR-3650	0	0	0	0	0	0
hsa-miR-3652	0	0	0	0	0	0
hsa-miR-3653	0	0	0	0	0	0
hsa-miR-3654	0	0	0	0	0	0
hsa-miR-3655	0	0	0	0	0	0
hsa-miR-3656	0	0	0	0	0	0
hsa-miR-3657	0	0	0	0	0	0
hsa-miR-3658	0	0	0	0	0	0
hsa-miR-3659	0	0	0	0	0	0
hsa-miR-3660	0	0	0	0	0	0
hsa-miR-3662	0	0	0	0	0	0
hsa-miR-3663-3p	0	0	0	0	0	0
hsa-miR-3663-5p	0	0	0	0	0	0
hsa-miR-3665	0	0	0	0	0	0
hsa-miR-3666	0	0	0	0	0	0
hsa-miR-3667-3p	0	0	0	0	0	0
hsa-miR-3667-5p	0	0	0	0	0	0
hsa-miR-3668	0	0	0	0	0	0
hsa-miR-3669	0	0	0	0	0	0
hsa-miR-3670	0	0	0	0	0	0
hsa-miR-3671	0	0	0	0	0	0
hsa-miR-3672	0	0	0	0	0	0
hsa-miR-3673	0	0	0	0	0	0
hsa-miR-367-3p	0	0	0	0	0	0
hsa-miR-3674	0	0	0	0	0	0
hsa-miR-3675-3p	0	0	0	0	0	0
hsa-miR-3676-3p	0	0	0	0	0	0
hsa-miR-3676-5p	0	0	0	0	0	0
hsa-miR-3677-5p	0	0	0	0	0	0
hsa-miR-3678-3p	0	0	0	0	0	0
hsa-miR-3678-5p	0	0	0	0	0	0
hsa-miR-3680-3p	0	0	0	0	0	0
hsa-miR-3680-5p	0	0	0	0	0	0
hsa-miR-3681-3p	0	0	0	0	0	0
hsa-miR-3681-5p	0	0	0	0	0	0
hsa-miR-3682-3p	0	0	0	0	0	0
hsa-miR-3682-5p	0	0	0	0	0	0
hsa-miR-3683	0	0	0	0	0	0
hsa-miR-3686	0	0	0	0	0	0
hsa-miR-3689a-3p	0	0	0	0	0	0
hsa-miR-3689b-3p	0	0	0	0	0	0
hsa-miR-3689c	0	0	0	0	0	0
hsa-miR-3689d	0	0	0	0	0	0
hsa-miR-3692-3p	0	0	0	0	0	0
hsa-miR-3692-5p	0	0	0	0	0	0
hsa-miR-3713	0	0	0	0	0	0
hsa-miR-3714	0	0	0	0	0	0
hsa-miR-371a-3p	0	0	0	0	0	0
hsa-miR-371a-5p	0	0	0	0	0	0
hsa-miR-371b-3p	0	0	0	0	0	0
hsa-miR-371b-5p	0	0	0	0	0	0
hsa-miR-372	0	0	0	0	0	0
hsa-miR-373-5p	0	0	0	0	0	0
hsa-miR-374c-5p	0	0	0	0	0	0
hsa-miR-378b	0	0	0	0	0	0
hsa-miR-378e	0	0	0	0	0	0
hsa-miR-378f	0	0	0	0	0	0
hsa-miR-378g	0	0	0	0	0	0
hsa-miR-378h	0	0	0	0	0	0
hsa-miR-378i	0	0	0	0	0	0
hsa-miR-380-5p	0	0	0	0	0	0
hsa-miR-383	0	0	0	0	0	0
hsa-miR-384	0	0	0	0	0	0
hsa-miR-3907	0	0	0	0	0	0
hsa-miR-3908	0	0	0	0	0	0
hsa-miR-3910	0	0	0	0	0	0
hsa-miR-3914	0	0	0	0	0	0
hsa-miR-3915	0	0	0	0	0	0
hsa-miR-3916	0	0	0	0	0	0
hsa-miR-3917	0	0	0	0	0	0
hsa-miR-3919	0	0	0	0	0	0
hsa-miR-3920	0	0	0	0	0	0
hsa-miR-3921	0	0	0	0	0	0
hsa-miR-3922-5p	0	0	0	0	0	0
hsa-miR-3923	0	0	0	0	0	0
hsa-miR-3924	0	0	0	0	0	0
hsa-miR-3925-3p	0	0	0	0	0	0
hsa-miR-3925-5p	0	0	0	0	0	0
hsa-miR-3926	0	0	0	0	0	0
hsa-miR-3927	0	0	0	0	0	0
hsa-miR-3935	0	0	0	0	0	0
hsa-miR-3936	0	0	0	0	0	0
hsa-miR-3937	0	0	0	0	0	0
hsa-miR-3938	0	0	0	0	0	0
hsa-miR-3940-5p	0	0	0	0	0	0
hsa-miR-3941	0	0	0	0	0	0
hsa-miR-3942-3p	0	0	0	0	0	0
hsa-miR-3943	0	0	0	0	0	0
hsa-miR-3945	0	0	0	0	0	0
hsa-miR-3960	0	0	0	0	0	0
hsa-miR-3972	0	0	0	0	0	0
hsa-miR-3973	0	0	0	0	0	0
hsa-miR-3974	0	0	0	0	0	0
hsa-miR-3975	0	0	0	0	0	0
hsa-miR-3976	0	0	0	0	0	0
hsa-miR-3977	0	0	0	0	0	0
hsa-miR-3978	0	0	0	0	0	0
hsa-miR-4253	0	0	0	0	0	0
hsa-miR-4254	0	0	0	0	0	0
hsa-miR-4255	0	0	0	0	0	0
hsa-miR-4256	0	0	0	0	0	0
hsa-miR-4257	0	0	0	0	0	0
hsa-miR-4258	0	0	0	0	0	0
hsa-miR-4259	0	0	0	0	0	0
hsa-miR-4260	0	0	0	0	0	0
hsa-miR-4261	0	0	0	0	0	0
hsa-miR-4262	0	0	0	0	0	0
hsa-miR-4263	0	0	0	0	0	0
hsa-miR-4264	0	0	0	0	0	0
hsa-miR-4265	0	0	0	0	0	0
hsa-miR-4266	0	0	0	0	0	0
hsa-miR-4267	0	0	0	0	0	0
hsa-miR-4268	0	0	0	0	0	0
hsa-miR-4269	0	0	0	0	0	0
hsa-miR-4270	0	0	0	0	0	0
hsa-miR-4271	0	0	0	0	0	0
hsa-miR-4272	0	0	0	0	0	0
hsa-miR-4273	0	0	0	0	0	0
hsa-miR-4274	0	0	0	0	0	0
hsa-miR-4275	0	0	0	0	0	0
hsa-miR-4276	0	0	0	0	0	0
hsa-miR-4277	0	0	0	0	0	0
hsa-miR-4278	0	0	0	0	0	0
hsa-miR-4279	0	0	0	0	0	0
hsa-miR-4280	0	0	0	0	0	0
hsa-miR-4281	0	0	0	0	0	0
hsa-miR-4282	0	0	0	0	0	0
hsa-miR-4283	0	0	0	0	0	0
hsa-miR-4284	0	0	0	0	0	0
hsa-miR-4285	0	0	0	0	0	0
hsa-miR-4286	0	0	0	0	0	0
hsa-miR-4287	0	0	0	0	0	0
hsa-miR-4288	0	0	0	0	0	0
hsa-miR-4289	0	0	0	0	0	0
hsa-miR-4290	0	0	0	0	0	0
hsa-miR-4291	0	0	0	0	0	0
hsa-miR-4292	0	0	0	0	0	0
hsa-miR-4293	0	0	0	0	0	0
hsa-miR-4294	0	0	0	0	0	0
hsa-miR-4295	0	0	0	0	0	0
hsa-miR-4296	0	0	0	0	0	0
hsa-miR-4297	0	0	0	0	0	0
hsa-miR-4298	0	0	0	0	0	0
hsa-miR-4299	0	0	0	0	0	0
hsa-miR-4300	0	0	0	0	0	0
hsa-miR-4301	0	0	0	0	0	0
hsa-miR-4302	0	0	0	0	0	0
hsa-miR-4303	0	0	0	0	0	0
hsa-miR-4304	0	0	0	0	0	0
hsa-miR-4305	0	0	0	0	0	0
hsa-miR-4306	0	0	0	0	0	0
hsa-miR-4307	0	0	0	0	0	0
hsa-miR-4308	0	0	0	0	0	0
hsa-miR-4309	0	0	0	0	0	0
hsa-miR-4312	0	0	0	0	0	0
hsa-miR-4313	0	0	0	0	0	0
hsa-miR-4314	0	0	0	0	0	0
hsa-miR-4315	0	0	0	0	0	0
hsa-miR-4316	0	0	0	0	0	0
hsa-miR-4317	0	0	0	0	0	0
hsa-miR-4318	0	0	0	0	0	0
hsa-miR-4319	0	0	0	0	0	0
hsa-miR-4322	0	0	0	0	0	0
hsa-miR-4323	0	0	0	0	0	0
hsa-miR-4324	0	0	0	0	0	0
hsa-miR-4325	0	0	0	0	0	0
hsa-miR-4326	0	0	0	0	0	0
hsa-miR-4327	0	0	0	0	0	0
hsa-miR-4328	0	0	0	0	0	0
hsa-miR-4329	0	0	0	0	0	0
hsa-miR-4330	0	0	0	0	0	0
hsa-miR-4417	0	0	0	0	0	0
hsa-miR-4418	0	0	0	0	0	0
hsa-miR-4419a	0	0	0	0	0	0
hsa-miR-4419b	0	0	0	0	0	0
hsa-miR-4420	0	0	0	0	0	0
hsa-miR-4422	0	0	0	0	0	0
hsa-miR-4423-3p	0	0	0	0	0	0
hsa-miR-4425	0	0	0	0	0	0
hsa-miR-4426	0	0	0	0	0	0
hsa-miR-4427	0	0	0	0	0	0
hsa-miR-4428	0	0	0	0	0	0
hsa-miR-4430	0	0	0	0	0	0
hsa-miR-4431	0	0	0	0	0	0
hsa-miR-4432	0	0	0	0	0	0
hsa-miR-4433-3p	0	0	0	0	0	0
hsa-miR-4433-5p	0	0	0	0	0	0
hsa-miR-4434	0	0	0	0	0	0
hsa-miR-4436a	0	0	0	0	0	0
hsa-miR-4436b-3p	0	0	0	0	0	0
hsa-miR-4436b-5p	0	0	0	0	0	0
hsa-miR-4437	0	0	0	0	0	0
hsa-miR-4438	0	0	0	0	0	0
hsa-miR-4439	0	0	0	0	0	0
hsa-miR-4440	0	0	0	0	0	0
hsa-miR-4441	0	0	0	0	0	0
hsa-miR-4442	0	0	0	0	0	0
hsa-miR-4443	0	0	0	0	0	0
hsa-miR-4444	0	0	0	0	0	0
hsa-miR-4445-3p	0	0	0	0	0	0
hsa-miR-4445-5p	0	0	0	0	0	0
hsa-miR-4446-3p	0	0	0	0	0	0
hsa-miR-4446-5p	0	0	0	0	0	0
hsa-miR-4447	0	0	0	0	0	0
hsa-miR-4450	0	0	0	0	0	0
hsa-miR-4451	0	0	0	0	0	0
hsa-miR-4452	0	0	0	0	0	0
hsa-miR-4453	0	0	0	0	0	0
hsa-miR-4455	0	0	0	0	0	0
hsa-miR-4456	0	0	0	0	0	0
hsa-miR-4457	0	0	0	0	0	0
hsa-miR-4458	0	0	0	0	0	0
hsa-miR-4459	0	0	0	0	0	0
hsa-miR-4460	0	0	0	0	0	0
hsa-miR-4461	0	0	0	0	0	0
hsa-miR-4462	0	0	0	0	0	0
hsa-miR-4463	0	0	0	0	0	0
hsa-miR-4464	0	0	0	0	0	0
hsa-miR-4465	0	0	0	0	0	0
hsa-miR-4466	0	0	0	0	0	0
hsa-miR-4467	0	0	0	0	0	0
hsa-miR-4468	0	0	0	0	0	0
hsa-miR-4470	0	0	0	0	0	0
hsa-miR-4471	0	0	0	0	0	0
hsa-miR-4472	0	0	0	0	0	0
hsa-miR-4473	0	0	0	0	0	0
hsa-miR-4474-3p	0	0	0	0	0	0
hsa-miR-4474-5p	0	0	0	0	0	0
hsa-miR-4475	0	0	0	0	0	0
hsa-miR-4476	0	0	0	0	0	0
hsa-miR-4477a	0	0	0	0	0	0
hsa-miR-4478	0	0	0	0	0	0
hsa-miR-4479	0	0	0	0	0	0
hsa-miR-448	0	0	0	0	0	0
hsa-miR-4480	0	0	0	0	0	0
hsa-miR-4481	0	0	0	0	0	0
hsa-miR-4482-5p	0	0	0	0	0	0
hsa-miR-4483	0	0	0	0	0	0
hsa-miR-4484	0	0	0	0	0	0
hsa-miR-4486	0	0	0	0	0	0
hsa-miR-4487	0	0	0	0	0	0
hsa-miR-4488	0	0	0	0	0	0
hsa-miR-4489	0	0	0	0	0	0
hsa-miR-4490	0	0	0	0	0	0
hsa-miR-4491	0	0	0	0	0	0
hsa-miR-4492	0	0	0	0	0	0
hsa-miR-4493	0	0	0	0	0	0
hsa-miR-4494	0	0	0	0	0	0
hsa-miR-4495	0	0	0	0	0	0
hsa-miR-4496	0	0	0	0	0	0
hsa-miR-4497	0	0	0	0	0	0
hsa-miR-4498	0	0	0	0	0	0
hsa-miR-4499	0	0	0	0	0	0
hsa-miR-449b-3p	0	0	0	0	0	0
hsa-miR-449b-5p	0	0	0	0	0	0
hsa-miR-449c-3p	0	0	0	0	0	0
hsa-miR-4500	0	0	0	0	0	0
hsa-miR-4501	0	0	0	0	0	0
hsa-miR-4502	0	0	0	0	0	0
hsa-miR-4503	0	0	0	0	0	0
hsa-miR-4505	0	0	0	0	0	0
hsa-miR-4506	0	0	0	0	0	0
hsa-miR-4507	0	0	0	0	0	0
hsa-miR-4508	0	0	0	0	0	0
hsa-miR-4509	0	0	0	0	0	0
hsa-miR-450a-3p	0	0	0	0	0	0
hsa-miR-450b-3p	0	0	0	0	0	0
hsa-miR-4512	0	0	0	0	0	0
hsa-miR-4513	0	0	0	0	0	0
hsa-miR-4514	0	0	0	0	0	0
hsa-miR-4515	0	0	0	0	0	0
hsa-miR-4516	0	0	0	0	0	0
hsa-miR-4517	0	0	0	0	0	0
hsa-miR-4518	0	0	0	0	0	0
hsa-miR-4519	0	0	0	0	0	0
hsa-miR-451b	0	0	0	0	0	0
hsa-miR-4520b-3p	0	0	0	0	0	0
hsa-miR-4520b-5p	0	0	0	0	0	0
hsa-miR-4521	0	0	0	0	0	0
hsa-miR-4522	0	0	0	0	0	0
hsa-miR-452-3p	0	0	0	0	0	0
hsa-miR-4524b-5p	0	0	0	0	0	0
hsa-miR-4525	0	0	0	0	0	0
hsa-miR-4526	0	0	0	0	0	0
hsa-miR-4527	0	0	0	0	0	0
hsa-miR-4528	0	0	0	0	0	0
hsa-miR-4529-3p	0	0	0	0	0	0
hsa-miR-4529-5p	0	0	0	0	0	0
hsa-miR-4530	0	0	0	0	0	0
hsa-miR-4531	0	0	0	0	0	0
hsa-miR-4532	0	0	0	0	0	0
hsa-miR-4533	0	0	0	0	0	0
hsa-miR-4534	0	0	0	0	0	0
hsa-miR-4535	0	0	0	0	0	0
hsa-miR-4536-3p	0	0	0	0	0	0
hsa-miR-4536-5p	0	0	0	0	0	0
hsa-miR-4537	0	0	0	0	0	0
hsa-miR-4538	0	0	0	0	0	0
hsa-miR-4539	0	0	0	0	0	0
hsa-miR-4632	0	0	0	0	0	0
hsa-miR-4633-3p	0	0	0	0	0	0
hsa-miR-4633-5p	0	0	0	0	0	0
hsa-miR-4634	0	0	0	0	0	0
hsa-miR-4635	0	0	0	0	0	0
hsa-miR-4636	0	0	0	0	0	0
hsa-miR-4637	0	0	0	0	0	0
hsa-miR-4638-5p	0	0	0	0	0	0
hsa-miR-4639-3p	0	0	0	0	0	0
hsa-miR-4639-5p	0	0	0	0	0	0
hsa-miR-4640-3p	0	0	0	0	0	0
hsa-miR-4640-5p	0	0	0	0	0	0
hsa-miR-4641	0	0	0	0	0	0
hsa-miR-4643	0	0	0	0	0	0
hsa-miR-4644	0	0	0	0	0	0
hsa-miR-4645-5p	0	0	0	0	0	0
hsa-miR-4646-3p	0	0	0	0	0	0
hsa-miR-4646-5p	0	0	0	0	0	0
hsa-miR-4648	0	0	0	0	0	0
hsa-miR-4650-3p	0	0	0	0	0	0
hsa-miR-4650-5p	0	0	0	0	0	0
hsa-miR-4651	0	0	0	0	0	0
hsa-miR-4652-3p	0	0	0	0	0	0
hsa-miR-4652-5p	0	0	0	0	0	0
hsa-miR-4653-3p	0	0	0	0	0	0
hsa-miR-4653-5p	0	0	0	0	0	0
hsa-miR-4654	0	0	0	0	0	0
hsa-miR-4655-3p	0	0	0	0	0	0
hsa-miR-4655-5p	0	0	0	0	0	0
hsa-miR-4656	0	0	0	0	0	0
hsa-miR-4657	0	0	0	0	0	0
hsa-miR-4658	0	0	0	0	0	0
hsa-miR-4659a-3p	0	0	0	0	0	0
hsa-miR-4659a-5p	0	0	0	0	0	0
hsa-miR-4659b-3p	0	0	0	0	0	0
hsa-miR-4659b-5p	0	0	0	0	0	0
hsa-miR-466	0	0	0	0	0	0
hsa-miR-4660	0	0	0	0	0	0
hsa-miR-4662a-3p	0	0	0	0	0	0
hsa-miR-4662b	0	0	0	0	0	0
hsa-miR-4663	0	0	0	0	0	0
hsa-miR-4664-5p	0	0	0	0	0	0
hsa-miR-4665-3p	0	0	0	0	0	0
hsa-miR-4666a-3p	0	0	0	0	0	0
hsa-miR-4666a-5p	0	0	0	0	0	0
hsa-miR-4666b	0	0	0	0	0	0
hsa-miR-4667-3p	0	0	0	0	0	0
hsa-miR-4668-3p	0	0	0	0	0	0
hsa-miR-4668-5p	0	0	0	0	0	0
hsa-miR-4669	0	0	0	0	0	0
hsa-miR-4670-3p	0	0	0	0	0	0
hsa-miR-4670-5p	0	0	0	0	0	0
hsa-miR-4671-3p	0	0	0	0	0	0
hsa-miR-4671-5p	0	0	0	0	0	0
hsa-miR-4672	0	0	0	0	0	0
hsa-miR-4673	0	0	0	0	0	0
hsa-miR-4674	0	0	0	0	0	0
hsa-miR-4675	0	0	0	0	0	0
hsa-miR-4676-5p	0	0	0	0	0	0
hsa-miR-4678	0	0	0	0	0	0
hsa-miR-4680-3p	0	0	0	0	0	0
hsa-miR-4680-5p	0	0	0	0	0	0
hsa-miR-4681	0	0	0	0	0	0
hsa-miR-4684-3p	0	0	0	0	0	0
hsa-miR-4684-5p	0	0	0	0	0	0
hsa-miR-4685-5p	0	0	0	0	0	0
hsa-miR-4686	0	0	0	0	0	0
hsa-miR-4687-3p	0	0	0	0	0	0
hsa-miR-4688	0	0	0	0	0	0
hsa-miR-4689	0	0	0	0	0	0
hsa-miR-4690-3p	0	0	0	0	0	0
hsa-miR-4690-5p	0	0	0	0	0	0
hsa-miR-4691-3p	0	0	0	0	0	0
hsa-miR-4691-5p	0	0	0	0	0	0
hsa-miR-4692	0	0	0	0	0	0
hsa-miR-4693-3p	0	0	0	0	0	0
hsa-miR-4693-5p	0	0	0	0	0	0
hsa-miR-4694-3p	0	0	0	0	0	0
hsa-miR-4694-5p	0	0	0	0	0	0
hsa-miR-4695-3p	0	0	0	0	0	0
hsa-miR-4695-5p	0	0	0	0	0	0
hsa-miR-4696	0	0	0	0	0	0
hsa-miR-4697-3p	0	0	0	0	0	0
hsa-miR-4697-5p	0	0	0	0	0	0
hsa-miR-4698	0	0	0	0	0	0
hsa-miR-4699-3p	0	0	0	0	0	0
hsa-miR-4699-5p	0	0	0	0	0	0
hsa-miR-4700-3p	0	0	0	0	0	0
hsa-miR-4700-5p	0	0	0	0	0	0
hsa-miR-4701-3p	0	0	0	0	0	0
hsa-miR-4701-5p	0	0	0	0	0	0
hsa-miR-4703-3p	0	0	0	0	0	0
hsa-miR-4703-5p	0	0	0	0	0	0
hsa-miR-4704-3p	0	0	0	0	0	0
hsa-miR-4704-5p	0	0	0	0	0	0
hsa-miR-4705	0	0	0	0	0	0
hsa-miR-4707-5p	0	0	0	0	0	0
hsa-miR-4708-3p	0	0	0	0	0	0
hsa-miR-4708-5p	0	0	0	0	0	0
hsa-miR-4710	0	0	0	0	0	0
hsa-miR-4711-3p	0	0	0	0	0	0
hsa-miR-4711-5p	0	0	0	0	0	0
hsa-miR-4712-3p	0	0	0	0	0	0
hsa-miR-4712-5p	0	0	0	0	0	0
hsa-miR-4713-3p	0	0	0	0	0	0
hsa-miR-4713-5p	0	0	0	0	0	0
hsa-miR-4714-5p	0	0	0	0	0	0
hsa-miR-4715-3p	0	0	0	0	0	0
hsa-miR-4715-5p	0	0	0	0	0	0
hsa-miR-4716-3p	0	0	0	0	0	0
hsa-miR-4716-5p	0	0	0	0	0	0
hsa-miR-4717-3p	0	0	0	0	0	0
hsa-miR-4717-5p	0	0	0	0	0	0
hsa-miR-4718	0	0	0	0	0	0
hsa-miR-4719	0	0	0	0	0	0
hsa-miR-4720-3p	0	0	0	0	0	0
hsa-miR-4720-5p	0	0	0	0	0	0
hsa-miR-4722-3p	0	0	0	0	0	0
hsa-miR-4722-5p	0	0	0	0	0	0
hsa-miR-4723-3p	0	0	0	0	0	0
hsa-miR-4723-5p	0	0	0	0	0	0
hsa-miR-4724-3p	0	0	0	0	0	0
hsa-miR-4724-5p	0	0	0	0	0	0
hsa-miR-4725-5p	0	0	0	0	0	0
hsa-miR-4726-3p	0	0	0	0	0	0
hsa-miR-4727-3p	0	0	0	0	0	0
hsa-miR-4727-5p	0	0	0	0	0	0
hsa-miR-4728-3p	0	0	0	0	0	0
hsa-miR-4728-5p	0	0	0	0	0	0
hsa-miR-4731-3p	0	0	0	0	0	0
hsa-miR-4732-3p	0	0	0	0	0	0
hsa-miR-4732-5p	0	0	0	0	0	0
hsa-miR-4733-5p	0	0	0	0	0	0
hsa-miR-4734	0	0	0	0	0	0
hsa-miR-4735-3p	0	0	0	0	0	0
hsa-miR-4735-5p	0	0	0	0	0	0
hsa-miR-4736	0	0	0	0	0	0
hsa-miR-4737	0	0	0	0	0	0
hsa-miR-4738-3p	0	0	0	0	0	0
hsa-miR-4738-5p	0	0	0	0	0	0
hsa-miR-4739	0	0	0	0	0	0
hsa-miR-4740-3p	0	0	0	0	0	0
hsa-miR-4740-5p	0	0	0	0	0	0
hsa-miR-4742-5p	0	0	0	0	0	0
hsa-miR-4743	0	0	0	0	0	0
hsa-miR-4744	0	0	0	0	0	0
hsa-miR-4745-3p	0	0	0	0	0	0
hsa-miR-4746-3p	0	0	0	0	0	0
hsa-miR-4747-3p	0	0	0	0	0	0
hsa-miR-4747-5p	0	0	0	0	0	0
hsa-miR-4749-3p	0	0	0	0	0	0
hsa-miR-4749-5p	0	0	0	0	0	0
hsa-miR-4750	0	0	0	0	0	0
hsa-miR-4751	0	0	0	0	0	0
hsa-miR-4752	0	0	0	0	0	0
hsa-miR-4753-3p	0	0	0	0	0	0
hsa-miR-4753-5p	0	0	0	0	0	0
hsa-miR-4754	0	0	0	0	0	0
hsa-miR-4755-5p	0	0	0	0	0	0
hsa-miR-4756-3p	0	0	0	0	0	0
hsa-miR-4756-5p	0	0	0	0	0	0
hsa-miR-4757-3p	0	0	0	0	0	0
hsa-miR-4757-5p	0	0	0	0	0	0
hsa-miR-4758-5p	0	0	0	0	0	0
hsa-miR-4759	0	0	0	0	0	0
hsa-miR-4760-3p	0	0	0	0	0	0
hsa-miR-4760-5p	0	0	0	0	0	0
hsa-miR-4761-5p	0	0	0	0	0	0
hsa-miR-4762-3p	0	0	0	0	0	0
hsa-miR-4763-3p	0	0	0	0	0	0
hsa-miR-4763-5p	0	0	0	0	0	0
hsa-miR-4764-3p	0	0	0	0	0	0
hsa-miR-4764-5p	0	0	0	0	0	0
hsa-miR-4765	0	0	0	0	0	0
hsa-miR-4766-3p	0	0	0	0	0	0
hsa-miR-4766-5p	0	0	0	0	0	0
hsa-miR-4768-3p	0	0	0	0	0	0
hsa-miR-4769-5p	0	0	0	0	0	0
hsa-miR-4770	0	0	0	0	0	0
hsa-miR-4771	0	0	0	0	0	0
hsa-miR-4772-3p	0	0	0	0	0	0
hsa-miR-4772-5p	0	0	0	0	0	0
hsa-miR-4774-3p	0	0	0	0	0	0
hsa-miR-4774-5p	0	0	0	0	0	0
hsa-miR-4776-3p	0	0	0	0	0	0
hsa-miR-4776-5p	0	0	0	0	0	0
hsa-miR-4777-3p	0	0	0	0	0	0
hsa-miR-4777-5p	0	0	0	0	0	0
hsa-miR-4778-3p	0	0	0	0	0	0
hsa-miR-4778-5p	0	0	0	0	0	0
hsa-miR-4779	0	0	0	0	0	0
hsa-miR-4780	0	0	0	0	0	0
hsa-miR-4781-5p	0	0	0	0	0	0
hsa-miR-4782-3p	0	0	0	0	0	0
hsa-miR-4782-5p	0	0	0	0	0	0
hsa-miR-4783-3p	0	0	0	0	0	0
hsa-miR-4783-5p	0	0	0	0	0	0
hsa-miR-4784	0	0	0	0	0	0
hsa-miR-4786-3p	0	0	0	0	0	0
hsa-miR-4787-5p	0	0	0	0	0	0
hsa-miR-4788	0	0	0	0	0	0
hsa-miR-4789-3p	0	0	0	0	0	0
hsa-miR-4789-5p	0	0	0	0	0	0
hsa-miR-4790-3p	0	0	0	0	0	0
hsa-miR-4790-5p	0	0	0	0	0	0
hsa-miR-4791	0	0	0	0	0	0
hsa-miR-4792	0	0	0	0	0	0
hsa-miR-4793-3p	0	0	0	0	0	0
hsa-miR-4793-5p	0	0	0	0	0	0
hsa-miR-4794	0	0	0	0	0	0
hsa-miR-4795-3p	0	0	0	0	0	0
hsa-miR-4795-5p	0	0	0	0	0	0
hsa-miR-4796-3p	0	0	0	0	0	0
hsa-miR-4796-5p	0	0	0	0	0	0
hsa-miR-4797-3p	0	0	0	0	0	0
hsa-miR-4797-5p	0	0	0	0	0	0
hsa-miR-4798-3p	0	0	0	0	0	0
hsa-miR-4798-5p	0	0	0	0	0	0
hsa-miR-4799-3p	0	0	0	0	0	0
hsa-miR-4800-3p	0	0	0	0	0	0
hsa-miR-4800-5p	0	0	0	0	0	0
hsa-miR-4801	0	0	0	0	0	0
hsa-miR-4802-5p	0	0	0	0	0	0
hsa-miR-4803	0	0	0	0	0	0
hsa-miR-4804-3p	0	0	0	0	0	0
hsa-miR-4804-5p	0	0	0	0	0	0
hsa-miR-486-3p	0	0	0	0	0	0
hsa-miR-488-3p	0	0	0	0	0	0
hsa-miR-488-5p	0	0	0	0	0	0
hsa-miR-490-3p	0	0	0	0	0	0
hsa-miR-490-5p	0	0	0	0	0	0
hsa-miR-492	0	0	0	0	0	0
hsa-miR-498	0	0	0	0	0	0
hsa-miR-4999-3p	0	0	0	0	0	0
hsa-miR-4999-5p	0	0	0	0	0	0
hsa-miR-499a-3p	0	0	0	0	0	0
hsa-miR-499b-3p	0	0	0	0	0	0
hsa-miR-499b-5p	0	0	0	0	0	0
hsa-miR-5000-5p	0	0	0	0	0	0
hsa-miR-5001-5p	0	0	0	0	0	0
hsa-miR-5002-3p	0	0	0	0	0	0
hsa-miR-5002-5p	0	0	0	0	0	0
hsa-miR-5003-3p	0	0	0	0	0	0
hsa-miR-5003-5p	0	0	0	0	0	0
hsa-miR-5004-3p	0	0	0	0	0	0
hsa-miR-5004-5p	0	0	0	0	0	0
hsa-miR-5006-3p	0	0	0	0	0	0
hsa-miR-5006-5p	0	0	0	0	0	0
hsa-miR-5007-3p	0	0	0	0	0	0
hsa-miR-5007-5p	0	0	0	0	0	0
hsa-miR-5008-3p	0	0	0	0	0	0
hsa-miR-5008-5p	0	0	0	0	0	0
hsa-miR-5009-3p	0	0	0	0	0	0
hsa-miR-5009-5p	0	0	0	0	0	0
hsa-miR-500b	0	0	0	0	0	0
hsa-miR-5010-5p	0	0	0	0	0	0
hsa-miR-5011-3p	0	0	0	0	0	0
hsa-miR-5011-5p	0	0	0	0	0	0
hsa-miR-502-5p	0	0	0	0	0	0
hsa-miR-504	0	0	0	0	0	0
hsa-miR-5047	0	0	0	0	0	0
hsa-miR-505-5p	0	0	0	0	0	0
hsa-miR-506-3p	0	0	0	0	0	0
hsa-miR-506-5p	0	0	0	0	0	0
hsa-miR-507	0	0	0	0	0	0
hsa-miR-508-3p	0	0	0	0	0	0
hsa-miR-508-5p	0	0	0	0	0	0
hsa-miR-5087	0	0	0	0	0	0
hsa-miR-5088	0	0	0	0	0	0
hsa-miR-5089	0	0	0	0	0	0
hsa-miR-5091	0	0	0	0	0	0
hsa-miR-5092	0	0	0	0	0	0
hsa-miR-5093	0	0	0	0	0	0
hsa-miR-509-3-5p	0	0	0	0	0	0
hsa-miR-509-3p	0	0	0	0	0	0
hsa-miR-5095	0	0	0	0	0	0
hsa-miR-509-5p	0	0	0	0	0	0
hsa-miR-510	0	0	0	0	0	0
hsa-miR-511	0	0	0	0	0	0
hsa-miR-512-3p	0	0	0	0	0	0
hsa-miR-512-5p	0	0	0	0	0	0
hsa-miR-513a-3p	0	0	0	0	0	0
hsa-miR-513a-5p	0	0	0	0	0	0
hsa-miR-513b	0	0	0	0	0	0
hsa-miR-513c-3p	0	0	0	0	0	0
hsa-miR-513c-5p	0	0	0	0	0	0
hsa-miR-514a-3p	0	0	0	0	0	0
hsa-miR-514a-5p	0	0	0	0	0	0
hsa-miR-514b-3p	0	0	0	0	0	0
hsa-miR-514b-5p	0	0	0	0	0	0
hsa-miR-515-3p	0	0	0	0	0	0
hsa-miR-516a-3p	0	0	0	0	0	0
hsa-miR-516a-5p	0	0	0	0	0	0
hsa-miR-516b-3p	0	0	0	0	0	0
hsa-miR-516b-5p	0	0	0	0	0	0
hsa-miR-517-5p	0	0	0	0	0	0
hsa-miR-517a-3p	0	0	0	0	0	0
hsa-miR-517b-3p	0	0	0	0	0	0
hsa-miR-517c-3p	0	0	0	0	0	0
hsa-miR-5186	0	0	0	0	0	0
hsa-miR-5187-3p	0	0	0	0	0	0
hsa-miR-5187-5p	0	0	0	0	0	0
hsa-miR-5188	0	0	0	0	0	0
hsa-miR-518a-3p	0	0	0	0	0	0
hsa-miR-518a-5p	0	0	0	0	0	0
hsa-miR-518b	0	0	0	0	0	0
hsa-miR-518c-3p	0	0	0	0	0	0
hsa-miR-518c-5p	0	0	0	0	0	0
hsa-miR-518d-3p	0	0	0	0	0	0
hsa-miR-518d-5p	0	0	0	0	0	0
hsa-miR-518e-3p	0	0	0	0	0	0
hsa-miR-518e-5p	0	0	0	0	0	0
hsa-miR-518f-3p	0	0	0	0	0	0
hsa-miR-518f-5p	0	0	0	0	0	0
hsa-miR-5190	0	0	0	0	0	0
hsa-miR-5191	0	0	0	0	0	0
hsa-miR-5192	0	0	0	0	0	0
hsa-miR-5193	0	0	0	0	0	0
hsa-miR-5194	0	0	0	0	0	0
hsa-miR-5195-3p	0	0	0	0	0	0
hsa-miR-5195-5p	0	0	0	0	0	0
hsa-miR-5196-3p	0	0	0	0	0	0
hsa-miR-5196-5p	0	0	0	0	0	0
hsa-miR-5197-3p	0	0	0	0	0	0
hsa-miR-5197-5p	0	0	0	0	0	0
hsa-miR-519a-3p	0	0	0	0	0	0
hsa-miR-519a-5p	0	0	0	0	0	0
hsa-miR-519b-3p	0	0	0	0	0	0
hsa-miR-519b-5p	0	0	0	0	0	0
hsa-miR-519c-3p	0	0	0	0	0	0
hsa-miR-519c-5p	0	0	0	0	0	0
hsa-miR-519d	0	0	0	0	0	0
hsa-miR-519e-3p	0	0	0	0	0	0
hsa-miR-519e-5p	0	0	0	0	0	0
hsa-miR-520a-3p	0	0	0	0	0	0
hsa-miR-520a-5p	0	0	0	0	0	0
hsa-miR-520b	0	0	0	0	0	0
hsa-miR-520c-3p	0	0	0	0	0	0
hsa-miR-520c-5p	0	0	0	0	0	0
hsa-miR-520d-3p	0	0	0	0	0	0
hsa-miR-520d-5p	0	0	0	0	0	0
hsa-miR-520e	0	0	0	0	0	0
hsa-miR-520f	0	0	0	0	0	0
hsa-miR-520g	0	0	0	0	0	0
hsa-miR-520h	0	0	0	0	0	0
hsa-miR-521	0	0	0	0	0	0
hsa-miR-522-3p	0	0	0	0	0	0
hsa-miR-522-5p	0	0	0	0	0	0
hsa-miR-523-3p	0	0	0	0	0	0
hsa-miR-523-5p	0	0	0	0	0	0
hsa-miR-524-3p	0	0	0	0	0	0
hsa-miR-524-5p	0	0	0	0	0	0
hsa-miR-525-3p	0	0	0	0	0	0
hsa-miR-525-5p	0	0	0	0	0	0
hsa-miR-526a	0	0	0	0	0	0
hsa-miR-526b-3p	0	0	0	0	0	0
hsa-miR-526b-5p	0	0	0	0	0	0
hsa-miR-527	0	0	0	0	0	0
hsa-miR-544b	0	0	0	0	0	0
hsa-miR-548ab	0	0	0	0	0	0
hsa-miR-548ac	0	0	0	0	0	0
hsa-miR-548ad	0	0	0	0	0	0
hsa-miR-548ae	0	0	0	0	0	0
hsa-miR-548ag	0	0	0	0	0	0
hsa-miR-548ah-5p	0	0	0	0	0	0
hsa-miR-548aj-3p	0	0	0	0	0	0
hsa-miR-548ak	0	0	0	0	0	0
hsa-miR-548am-3p	0	0	0	0	0	0
hsa-miR-548an	0	0	0	0	0	0
hsa-miR-548ao-5p	0	0	0	0	0	0
hsa-miR-548ap-3p	0	0	0	0	0	0
hsa-miR-548ap-5p	0	0	0	0	0	0
hsa-miR-548as-3p	0	0	0	0	0	0
hsa-miR-548at-3p	0	0	0	0	0	0
hsa-miR-548au-3p	0	0	0	0	0	0
hsa-miR-548av-3p	0	0	0	0	0	0
hsa-miR-548av-5p	0	0	0	0	0	0
hsa-miR-548aw	0	0	0	0	0	0
hsa-miR-548ax	0	0	0	0	0	0
hsa-miR-548b-3p	0	0	0	0	0	0
hsa-miR-548d-3p	0	0	0	0	0	0
hsa-miR-548f	0	0	0	0	0	0
hsa-miR-548m	0	0	0	0	0	0
hsa-miR-548t-5p	0	0	0	0	0	0
hsa-miR-548v	0	0	0	0	0	0
hsa-miR-548x-3p	0	0	0	0	0	0
hsa-miR-550a-3-5p	0	0	0	0	0	0
hsa-miR-550b-3p	0	0	0	0	0	0
hsa-miR-551a	0	0	0	0	0	0
hsa-miR-551b-3p	0	0	0	0	0	0
hsa-miR-551b-5p	0	0	0	0	0	0
hsa-miR-552	0	0	0	0	0	0
hsa-miR-553	0	0	0	0	0	0
hsa-miR-554	0	0	0	0	0	0
hsa-miR-555	0	0	0	0	0	0
hsa-miR-557	0	0	0	0	0	0
hsa-miR-5571-3p	0	0	0	0	0	0
hsa-miR-5571-5p	0	0	0	0	0	0
hsa-miR-5572	0	0	0	0	0	0
hsa-miR-5579-3p	0	0	0	0	0	0
hsa-miR-5579-5p	0	0	0	0	0	0
hsa-miR-558	0	0	0	0	0	0
hsa-miR-5580-3p	0	0	0	0	0	0
hsa-miR-5580-5p	0	0	0	0	0	0
hsa-miR-5581-5p	0	0	0	0	0	0
hsa-miR-5582-5p	0	0	0	0	0	0
hsa-miR-5583-3p	0	0	0	0	0	0
hsa-miR-5583-5p	0	0	0	0	0	0
hsa-miR-5584-3p	0	0	0	0	0	0
hsa-miR-5584-5p	0	0	0	0	0	0
hsa-miR-5585-5p	0	0	0	0	0	0
hsa-miR-5586-3p	0	0	0	0	0	0
hsa-miR-5586-5p	0	0	0	0	0	0
hsa-miR-5587-5p	0	0	0	0	0	0
hsa-miR-5588-3p	0	0	0	0	0	0
hsa-miR-5588-5p	0	0	0	0	0	0
hsa-miR-5589-3p	0	0	0	0	0	0
hsa-miR-5589-5p	0	0	0	0	0	0
hsa-miR-559	0	0	0	0	0	0
hsa-miR-5590-3p	0	0	0	0	0	0
hsa-miR-5590-5p	0	0	0	0	0	0
hsa-miR-5591-3p	0	0	0	0	0	0
hsa-miR-5591-5p	0	0	0	0	0	0
hsa-miR-562	0	0	0	0	0	0
hsa-miR-563	0	0	0	0	0	0
hsa-miR-564	0	0	0	0	0	0
hsa-miR-566	0	0	0	0	0	0
hsa-miR-567	0	0	0	0	0	0
hsa-miR-568	0	0	0	0	0	0
hsa-miR-5680	0	0	0	0	0	0
hsa-miR-5681a	0	0	0	0	0	0
hsa-miR-5681b	0	0	0	0	0	0
hsa-miR-5682	0	0	0	0	0	0
hsa-miR-5683	0	0	0	0	0	0
hsa-miR-5684	0	0	0	0	0	0
hsa-miR-5686	0	0	0	0	0	0
hsa-miR-5687	0	0	0	0	0	0
hsa-miR-5688	0	0	0	0	0	0
hsa-miR-5689	0	0	0	0	0	0
hsa-miR-569	0	0	0	0	0	0
hsa-miR-5691	0	0	0	0	0	0
hsa-miR-5692a	0	0	0	0	0	0
hsa-miR-5692b	0	0	0	0	0	0
hsa-miR-5693	0	0	0	0	0	0
hsa-miR-5694	0	0	0	0	0	0
hsa-miR-5696	0	0	0	0	0	0
hsa-miR-5697	0	0	0	0	0	0
hsa-miR-5698	0	0	0	0	0	0
hsa-miR-5700	0	0	0	0	0	0
hsa-miR-5701	0	0	0	0	0	0
hsa-miR-5702	0	0	0	0	0	0
hsa-miR-5703	0	0	0	0	0	0
hsa-miR-5704	0	0	0	0	0	0
hsa-miR-5705	0	0	0	0	0	0
hsa-miR-5707	0	0	0	0	0	0
hsa-miR-5708	0	0	0	0	0	0
hsa-miR-571	0	0	0	0	0	0
hsa-miR-572	0	0	0	0	0	0
hsa-miR-573	0	0	0	0	0	0
hsa-miR-575	0	0	0	0	0	0
hsa-miR-577	0	0	0	0	0	0
hsa-miR-578	0	0	0	0	0	0
hsa-miR-579	0	0	0	0	0	0
hsa-miR-581	0	0	0	0	0	0
hsa-miR-583	0	0	0	0	0	0
hsa-miR-585	0	0	0	0	0	0
hsa-miR-587	0	0	0	0	0	0
hsa-miR-588	0	0	0	0	0	0
hsa-miR-591	0	0	0	0	0	0
hsa-miR-593-3p	0	0	0	0	0	0
hsa-miR-593-5p	0	0	0	0	0	0
hsa-miR-595	0	0	0	0	0	0
hsa-miR-596	0	0	0	0	0	0
hsa-miR-599	0	0	0	0	0	0
hsa-miR-600	0	0	0	0	0	0
hsa-miR-601	0	0	0	0	0	0
hsa-miR-603	0	0	0	0	0	0
hsa-miR-604	0	0	0	0	0	0
hsa-miR-606	0	0	0	0	0	0
hsa-miR-607	0	0	0	0	0	0
hsa-miR-608	0	0	0	0	0	0
hsa-miR-609	0	0	0	0	0	0
hsa-miR-610	0	0	0	0	0	0
hsa-miR-611	0	0	0	0	0	0
hsa-miR-612	0	0	0	0	0	0
hsa-miR-613	0	0	0	0	0	0
hsa-miR-614	0	0	0	0	0	0
hsa-miR-615-5p	0	0	0	0	0	0
hsa-miR-616-3p	0	0	0	0	0	0
hsa-miR-617	0	0	0	0	0	0
hsa-miR-618	0	0	0	0	0	0
hsa-miR-619	0	0	0	0	0	0
hsa-miR-620	0	0	0	0	0	0
hsa-miR-621	0	0	0	0	0	0
hsa-miR-622	0	0	0	0	0	0
hsa-miR-623	0	0	0	0	0	0
hsa-miR-624-3p	0	0	0	0	0	0
hsa-miR-626	0	0	0	0	0	0
hsa-miR-630	0	0	0	0	0	0
hsa-miR-631	0	0	0	0	0	0
hsa-miR-632	0	0	0	0	0	0
hsa-miR-633	0	0	0	0	0	0
hsa-miR-634	0	0	0	0	0	0
hsa-miR-635	0	0	0	0	0	0
hsa-miR-637	0	0	0	0	0	0
hsa-miR-638	0	0	0	0	0	0
hsa-miR-639	0	0	0	0	0	0
hsa-miR-640	0	0	0	0	0	0
hsa-miR-642b-3p	0	0	0	0	0	0
hsa-miR-644a	0	0	0	0	0	0
hsa-miR-645	0	0	0	0	0	0
hsa-miR-646	0	0	0	0	0	0
hsa-miR-647	0	0	0	0	0	0
hsa-miR-648	0	0	0	0	0	0
hsa-miR-649	0	0	0	0	0	0
hsa-miR-650	0	0	0	0	0	0
hsa-miR-653	0	0	0	0	0	0
hsa-miR-657	0	0	0	0	0	0
hsa-miR-658	0	0	0	0	0	0
hsa-miR-660-3p	0	0	0	0	0	0
hsa-miR-661	0	0	0	0	0	0
hsa-miR-662	0	0	0	0	0	0
hsa-miR-663a	0	0	0	0	0	0
hsa-miR-663b	0	0	0	0	0	0
hsa-miR-670	0	0	0	0	0	0
hsa-miR-675-3p	0	0	0	0	0	0
hsa-miR-675-5p	0	0	0	0	0	0
hsa-miR-676-5p	0	0	0	0	0	0
hsa-miR-711	0	0	0	0	0	0
hsa-miR-720	0	0	0	0	0	0
hsa-miR-7-2-3p	0	0	0	0	0	0
hsa-miR-7-5p	0	0	0	0	0	0
hsa-miR-760	0	0	0	0	0	0
hsa-miR-761	0	0	0	0	0	0
hsa-miR-762	0	0	0	0	0	0
hsa-miR-764	0	0	0	0	0	0
hsa-miR-765	0	0	0	0	0	0
hsa-miR-767-3p	0	0	0	0	0	0
hsa-miR-767-5p	0	0	0	0	0	0
hsa-miR-802	0	0	0	0	0	0
hsa-miR-873-3p	0	0	0	0	0	0
hsa-miR-873-5p	0	0	0	0	0	0
hsa-miR-875-3p	0	0	0	0	0	0
hsa-miR-875-5p	0	0	0	0	0	0
hsa-miR-876-3p	0	0	0	0	0	0
hsa-miR-876-5p	0	0	0	0	0	0
hsa-miR-885-3p	0	0	0	0	0	0
hsa-miR-885-5p	0	0	0	0	0	0
hsa-miR-888-3p	0	0	0	0	0	0
hsa-miR-888-5p	0	0	0	0	0	0
hsa-miR-890	0	0	0	0	0	0
hsa-miR-891a	0	0	0	0	0	0
hsa-miR-891b	0	0	0	0	0	0
hsa-miR-892a	0	0	0	0	0	0
hsa-miR-892b	0	0	0	0	0	0
hsa-miR-920	0	0	0	0	0	0
hsa-miR-922	0	0	0	0	0	0
hsa-miR-924	0	0	0	0	0	0
hsa-miR-92a-2-5p	0	0	0	0	0	0
hsa-miR-936	0	0	0	0	0	0
hsa-miR-938	0	0	0	0	0	0
hsa-miR-9-3p	0	0	0	0	0	0
hsa-miR-944	0	0	0	0	0	0
hsa-miR-96-3p	0	0	0	0	0	0
Total Counts	0	0
hsa-miR-548as-5p	0	0.06	0	0.190226	0	0
hsa-miR-708-5p	25	0.5	560.928	1.58522	0	0
hsa-miR-3529-5p	0	0.5	0	1.58522	0	0
hsa-miR-642a-3p	0	0.5	0	1.58522	0	0
hsa-miR-642b-5p	0	0.5	0	1.58522	0	0
hsa-miR-1268b	0	0.63	0	1.99737	0	0
hsa-miR-422a	3	0.78	67.3114	2.47294	0	0
hsa-miR-548ar-5p	0	0.82	0	2.59976	0	0
hsa-miR-548c-3p	0	0.92	0	2.9168	0	0
hsa-miR-5699	1	0.93	22.4371	2.94851	0	0
hsa-miR-1273d	1.99	0.97	44.6499	3.07532	0	0
hsa-miR-548y	0	0.97	0	3.07532	0	0
hsa-miR-548b-5p	0	0.98	0	3.10703	0	0
hsa-miR-378d	1.87	0.99	41.9574	3.13873	0	0
hsa-miR-4510	1.05	0.99	23.559	3.13873	0	0
hsa-miR-548q	0	0.99	0	3.13873	0	0
hsa-miR-361-5p	727	1	16311.8	3.17044	0	0
hsa-miR-212-3p	20	1	448.743	3.17044	0	0
hsa-miR-548n	16.28	1	365.276	3.17044	0	0
hsa-miR-378a-5p	15	1	336.557	3.17044	0	0
hsa-miR-3934	9	1	201.934	3.17044	0	0
hsa-miR-548aq-5p	7.39	1	165.81	3.17044	0	0
hsa-miR-365b-5p	6	1	134.623	3.17044	0	0
hsa-miR-302a-3p	5	1	112.186	3.17044	0	0
hsa-miR-3912	5	1	112.186	3.17044	0	0
hsa-miR-548s	5	1	112.186	3.17044	0	0
hsa-miR-1228-3p	4	1	89.7485	3.17044	0	0
hsa-miR-3065-3p	4	1	89.7485	3.17044	0	0
hsa-miR-4687-5p	4	1	89.7485	3.17044	0	0
hsa-miR-541-3p	4	1	89.7485	3.17044	0	0
hsa-miR-598	4	1	89.7485	3.17044	0	0
hsa-miR-188-5p	3	1	67.3114	3.17044	0	0
hsa-miR-302c-3p	3	1	67.3114	3.17044	0	0
hsa-miR-3173-5p	3	1	67.3114	3.17044	0	0
hsa-miR-4642	3	1	67.3114	3.17044	0	0
hsa-miR-4707-3p	3	1	67.3114	3.17044	0	0
hsa-miR-584-3p	3	1	67.3114	3.17044	0	0
hsa-miR-642a-5p	3	1	67.3114	3.17044	0	0
hsa-miR-644b-5p	3	1	67.3114	3.17044	0	0
hsa-miR-4685-3p	2.99	1	67.087	3.17044	0	0
hsa-miR-4448	2.87	1	64.3945	3.17044	0	0
hsa-miR-3128	2	1	44.8743	3.17044	0	0
hsa-miR-3140-3p	2	1	44.8743	3.17044	0	0
hsa-miR-3175	2	1	44.8743	3.17044	0	0
hsa-miR-3913-3p	2	1	44.8743	3.17044	0	0
hsa-miR-3913-5p	2	1	44.8743	3.17044	0	0
hsa-miR-449c-5p	2	1	44.8743	3.17044	0	0
hsa-miR-4741	2	1	44.8743	3.17044	0	0
hsa-miR-4742-3p	2	1	44.8743	3.17044	0	0
hsa-miR-5000-3p	2	1	44.8743	3.17044	0	0
hsa-miR-549	2	1	44.8743	3.17044	0	0
hsa-miR-877-3p	2	1	44.8743	3.17044	0	0
hsa-miR-1277-3p	1	1	22.4371	3.17044	0	0
hsa-miR-196a-5p	1	1	22.4371	3.17044	0	0
hsa-miR-196b-5p	1	1	22.4371	3.17044	0	0
hsa-miR-200a-3p	1	1	22.4371	3.17044	0	0
hsa-miR-3064-5p	1	1	22.4371	3.17044	0	0
hsa-miR-3160-3p	1	1	22.4371	3.17044	0	0
hsa-miR-326	1	1	22.4371	3.17044	0	0
hsa-miR-338-5p	1	1	22.4371	3.17044	0	0
hsa-miR-3619-5p	1	1	22.4371	3.17044	0	0
hsa-miR-4647	1	1	22.4371	3.17044	0	0
hsa-miR-4677-5p	1	1	22.4371	3.17044	0	0
hsa-miR-4773	1	1	22.4371	3.17044	0	0
hsa-miR-4787-3p	1	1	22.4371	3.17044	0	0
hsa-miR-5695	1	1	22.4371	3.17044	0	0
hsa-miR-1	0	1	0	3.17044	0	0
hsa-miR-10b-3p	0	1	0	3.17044	0	0
hsa-miR-1228-5p	0	1	0	3.17044	0	0
hsa-miR-1272	0	1	0	3.17044	0	0
hsa-miR-1273f	0	1	0	3.17044	0	0
hsa-miR-1291	0	1	0	3.17044	0	0
hsa-miR-1302	0	1	0	3.17044	0	0
hsa-miR-1973	0	1	0	3.17044	0	0
hsa-miR-200b-3p	0	1	0	3.17044	0	0
hsa-miR-2116-3p	0	1	0	3.17044	0	0
hsa-miR-3064-3p	0	1	0	3.17044	0	0
hsa-miR-3138	0	1	0	3.17044	0	0
hsa-miR-3144-3p	0	1	0	3.17044	0	0
hsa-miR-3155a	0	1	0	3.17044	0	0
hsa-miR-3180-5p	0	1	0	3.17044	0	0
hsa-miR-3189-5p	0	1	0	3.17044	0	0
hsa-miR-3191-5p	0	1	0	3.17044	0	0
hsa-miR-342-5p	0	1	0	3.17044	0	0
hsa-miR-3664-5p	0	1	0	3.17044	0	0
hsa-miR-367-5p	0	1	0	3.17044	0	0
hsa-miR-3911	0	1	0	3.17044	0	0
hsa-miR-3918	0	1	0	3.17044	0	0
hsa-miR-3922-3p	0	1	0	3.17044	0	0
hsa-miR-429	0	1	0	3.17044	0	0
hsa-miR-4424	0	1	0	3.17044	0	0
hsa-miR-4449	0	1	0	3.17044	0	0
hsa-miR-4524b-3p	0	1	0	3.17044	0	0
hsa-miR-4649-5p	0	1	0	3.17044	0	0
hsa-miR-4683	0	1	0	3.17044	0	0
hsa-miR-4706	0	1	0	3.17044	0	0
hsa-miR-4729	0	1	0	3.17044	0	0
hsa-miR-4731-5p	0	1	0	3.17044	0	0
hsa-miR-4748	0	1	0	3.17044	0	0
hsa-miR-4781-3p	0	1	0	3.17044	0	0
hsa-miR-5090	0	1	0	3.17044	0	0
hsa-miR-515-5p	0	1	0	3.17044	0	0
hsa-miR-5189	0	1	0	3.17044	0	0
hsa-miR-556-3p	0	1	0	3.17044	0	0
hsa-miR-5587-3p	0	1	0	3.17044	0	0
hsa-miR-5690	0	1	0	3.17044	0	0
hsa-miR-602	0	1	0	3.17044	0	0
hsa-miR-676-3p	0	1	0	3.17044	0	0
hsa-miR-548g-3p	0	1.33	0	4.21668	0	0
hsa-miR-548aj-5p	1.1	1.76	24.6808	5.57997	0	0
hsa-miR-548g-5p	1.1	1.76	24.6808	5.57997	0	0
hsa-miR-548x-5p	1.1	1.76	24.6808	5.57997	0	0
hsa-miR-548am-5p	6.36	1.78	142.7	5.64338	0	0
hsa-miR-548c-5p	6.36	1.78	142.7	5.64338	0	0
hsa-miR-548o-5p	6.36	1.78	142.7	5.64338	0	0
hsa-miR-497-3p	0	1.95	0	6.18235	0	0
hsa-miR-3687	0	1.99	0	6.30917	0	0
hsa-miR-3129-3p	16	2	358.994	6.34087	0	0
hsa-miR-99a-3p	15	2	336.557	6.34087	0	0
hsa-miR-296-5p	12	2	269.246	6.34087	0	0
hsa-miR-135b-5p	11	2	246.808	6.34087	0	0
hsa-miR-302b-3p	9	2	201.934	6.34087	0	0
hsa-miR-4661-5p	8.99	2	201.71	6.34087	0	0
hsa-miR-3661	8	2	179.497	6.34087	0	0
hsa-miR-5581-3p	7	2	157.06	6.34087	0	0
hsa-miR-219-1-3p	6	2	134.623	6.34087	0	0
hsa-miR-2355-3p	6	2	134.623	6.34087	0	0
hsa-miR-9-5p	6	2	134.623	6.34087	0	0
hsa-miR-1303	5	2	112.186	6.34087	0	0
hsa-miR-548a-3p	5	2	112.186	6.34087	0	0
hsa-let-7g-3p	4	2	89.7485	6.34087	0	0
hsa-miR-216a	4	2	89.7485	6.34087	0	0
hsa-miR-3180-3p	4	2	89.7485	6.34087	0	0
hsa-miR-34c-3p	4	2	89.7485	6.34087	0	0
hsa-miR-668	3.99	2	89.5241	6.34087	0	0
hsa-miR-548at-5p	3.08	2	69.1063	6.34087	0	0
hsa-miR-1245b-3p	3	2	67.3114	6.34087	0	0
hsa-miR-186-3p	3	2	67.3114	6.34087	0	0
hsa-miR-3145-5p	3	2	67.3114	6.34087	0	0
hsa-miR-3157-5p	3	2	67.3114	6.34087	0	0
hsa-miR-3928	3	2	67.3114	6.34087	0	0
hsa-miR-4785	3	2	67.3114	6.34087	0	0
hsa-miR-4786-5p	3	2	67.3114	6.34087	0	0
hsa-miR-1244	2	2	44.8743	6.34087	0	0
hsa-miR-491-3p	2	2	44.8743	6.34087	0	0
hsa-miR-1304-5p	1	2	22.4371	6.34087	0	0
hsa-miR-142-3p	1	2	22.4371	6.34087	0	0
hsa-miR-3074-3p	1	2	22.4371	6.34087	0	0
hsa-miR-3944-5p	1	2	22.4371	6.34087	0	0
hsa-miR-4504	1	2	22.4371	6.34087	0	0
hsa-miR-5001-3p	1	2	22.4371	6.34087	0	0
hsa-miR-545-5p	1	2	22.4371	6.34087	0	0
hsa-miR-548ar-3p	1	2	22.4371	6.34087	0	0
hsa-miR-1299	0	2	0	6.34087	0	0
hsa-miR-2115-5p	0	2	0	6.34087	0	0
hsa-miR-2117	0	2	0	6.34087	0	0
hsa-miR-3117-5p	0	2	0	6.34087	0	0
hsa-miR-3118	0	2	0	6.34087	0	0
hsa-miR-3689f	0	2	0	6.34087	0	0
hsa-miR-4320	0	2	0	6.34087	0	0
hsa-miR-4477b	0	2	0	6.34087	0	0
hsa-miR-4758-3p	0	2	0	6.34087	0	0
hsa-miR-483-3p	0	2	0	6.34087	0	0
hsa-miR-491-5p	0	2	0	6.34087	0	0
hsa-miR-548al	0	2	0	6.34087	0	0
hsa-miR-5585-3p	0	2	0	6.34087	0	0
hsa-miR-943	0	2	0	6.34087	0	0
hsa-miR-197-3p	1917	2.43	43012	7.70416	0	0
hsa-miR-877-5p	17.98	2.77	403.42	8.78211	0	0
hsa-miR-615-3p	0	2.98	0	9.4479	0	0
hsa-miR-126-3p	5189	3	116426	9.51131	0	0
hsa-miR-627	17	3	381.431	9.51131	0	0
hsa-miR-138-1-3p	15	3	336.557	9.51131	0	0
hsa-miR-3940-3p	13	3	291.683	9.51131	0	0
hsa-miR-3174	12	3	269.246	9.51131	0	0
hsa-miR-605	12	3	269.246	9.51131	0	0
hsa-miR-365a-5p	8	3	179.497	9.51131	0	0
hsa-miR-1306-5p	7	3	157.06	9.51131	0	0
hsa-miR-548l	6	3	134.623	9.51131	0	0
hsa-miR-103a-2-5p	5	3	112.186	9.51131	0	0
hsa-miR-302d-3p	5	3	112.186	9.51131	0	0
hsa-miR-4768-5p	5	3	112.186	9.51131	0	0
hsa-miR-1293	4.99	3	111.961	9.51131	0	0
hsa-miR-1284	4	3	89.7485	9.51131	0	0
hsa-miR-148b-5p	4	3	89.7485	9.51131	0	0
hsa-miR-3177-3p	3	3	67.3114	9.51131	0	0
hsa-miR-586	3	3	67.3114	9.51131	0	0
hsa-miR-187-3p	2	3	44.8743	9.51131	0	0
hsa-miR-4725-3p	2	3	44.8743	9.51131	0	0
hsa-miR-4523	1	3	22.4371	9.51131	0	0
hsa-miR-4665-5p	1	3	22.4371	9.51131	0	0
hsa-miR-592	1	3	22.4371	9.51131	0	0
hsa-miR-1224-3p	0	3	0	9.51131	0	0
hsa-miR-141-5p	0	3	0	9.51131	0	0
hsa-miR-3130-5p	0	3	0	9.51131	0	0
hsa-miR-3131	0	3	0	9.51131	0	0
hsa-miR-3609	0	3	0	9.51131	0	0
hsa-miR-499a-5p	0	3	0	9.51131	0	0
hsa-miR-320e	0	3.31	0	10.4941	0	0
hsa-miR-561-3p	19.98	4	448.294	12.6817	0	0
hsa-miR-1294	19	4	426.305	12.6817	0	0
hsa-miR-580	18	4	403.868	12.6817	0	0
hsa-miR-576-3p	12	4	269.246	12.6817	0	0
hsa-miR-769-3p	11	4	246.808	12.6817	0	0
hsa-miR-4645-3p	10	4	224.371	12.6817	0	0
hsa-miR-4761-3p	3	4	67.3114	12.6817	0	0
hsa-miR-628-3p	3	4	67.3114	12.6817	0	0
hsa-miR-1226-3p	2	4	44.8743	12.6817	0	0
hsa-miR-3942-5p	1	4	22.4371	12.6817	0	0
hsa-miR-3651	0	4	0	12.6817	0	0
hsa-miR-449a	0	4	0	12.6817	0	0
hsa-miR-4524a-5p	0	4	0	12.6817	0	0
hsa-miR-718	0	4	0	12.6817	0	0
hsa-miR-548h-5p	8.52	4.03	191.164	12.7769	0	0
hsa-miR-1254	9	4.84	201.934	15.3449	0	0
hsa-miR-26a-1-3p	43	5	964.796	15.8522	0	0
hsa-miR-3677-3p	41	5	919.922	15.8522	0	0
hsa-miR-4454	28	5	628.24	15.8522	0	0
hsa-miR-142-5p	27	5	605.802	15.8522	0	0
hsa-miR-541-5p	22	5	493.617	15.8522	0	0
hsa-miR-139-5p	19	5	426.305	15.8522	0	0
hsa-miR-644b-3p	9	5	201.934	15.8522	0	0
hsa-miR-19b-1-5p	5	5	112.186	15.8522	0	0
hsa-miR-188-3p	4	5	89.7485	15.8522	0	0
hsa-miR-19a-5p	4	5	89.7485	15.8522	0	0
hsa-miR-3127-5p	4	5	89.7485	15.8522	0	0
hsa-miR-96-5p	1	5	22.4371	15.8522	0	0
hsa-miR-101-5p	0	5	0	15.8522	0	0
hsa-miR-323b-5p	0	5	0	15.8522	0	0
hsa-miR-127-3p	77088	5.09	1.72963e+06	16.1375	0	0
hsa-miR-548i	4.15	5.21	93.1141	16.518	0	0
hsa-miR-548aq-3p	18.68	5.61	419.125	17.7861	0	0
hsa-miR-548au-5p	2.78	5.92	62.3752	18.769	0	0
hsa-miR-548ah-3p	5.91	5.95	132.603	18.8641	0	0
hsa-miR-1271-5p	414.96	6	9310.51	19.0226	0	0
hsa-miR-629-3p	33.01	6	740.649	19.0226	0	0
hsa-miR-4435	20	6	448.743	19.0226	0	0
hsa-miR-500a-5p	20	6	448.743	19.0226	0	0
hsa-miR-3200-3p	13	6	291.683	19.0226	0	0
hsa-miR-33a-3p	13	6	291.683	19.0226	0	0
hsa-miR-770-5p	10	6	224.371	19.0226	0	0
hsa-miR-24-2-5p	9	6	201.934	19.0226	0	0
hsa-miR-301a-5p	9	6	201.934	19.0226	0	0
hsa-miR-185-3p	6	6	134.623	19.0226	0	0
hsa-miR-340-3p	6	6	134.623	19.0226	0	0
hsa-miR-624-5p	5	6	112.186	19.0226	0	0
hsa-miR-3679-5p	3	6	67.3114	19.0226	0	0
hsa-miR-129-1-3p	0	6	0	19.0226	0	0
hsa-miR-3153	0	6	0	19.0226	0	0
hsa-miR-181c-3p	18.73	6.95	420.247	22.0345	0	0
hsa-miR-548u	9.43	6.99	211.582	22.1613	0	0
hsa-miR-92a-3p	39385.9	7	883706	22.1931	0	0
hsa-miR-3605-5p	26	7	583.365	22.1931	0	0
hsa-miR-4746-5p	12	7	269.246	22.1931	0	0
hsa-miR-1343	6	7	134.623	22.1931	0	0
hsa-miR-659-5p	5	7	112.186	22.1931	0	0
hsa-miR-24-1-5p	4	7	89.7485	22.1931	0	0
hsa-miR-3620	3	7	67.3114	22.1931	0	0
hsa-miR-3929	3	7	67.3114	22.1931	0	0
hsa-miR-3130-3p	2	7	44.8743	22.1931	0	0
hsa-miR-590-5p	2	7	44.8743	22.1931	0	0
hsa-miR-1908	1	7	22.4371	22.1931	0	0
hsa-miR-1290	0	7	0	22.1931	0	0
hsa-miR-1295a	0	7	0	22.1931	0	0
hsa-miR-147b	0	7	0	22.1931	0	0
hsa-miR-939	0	7	0	22.1931	0	0
hsa-miR-320d	0	7.67	0	24.3172	0	0
hsa-miR-1255a	33	8	740.425	25.3635	0	0
hsa-miR-10a-3p	15	8	336.557	25.3635	0	0
hsa-miR-143-5p	14	8	314.12	25.3635	0	0
hsa-miR-146b-3p	6	8	134.623	25.3635	0	0
hsa-miR-2467-5p	60	9	1346.23	28.5339	0	0
hsa-miR-652-3p	56	9	1256.48	28.5339	0	0
hsa-miR-330-5p	25	9	560.928	28.5339	0	0
hsa-miR-542-5p	16	9	358.994	28.5339	0	0
hsa-miR-651	10	9	224.371	28.5339	0	0
hsa-miR-550a-3p	17.5	9.5	392.65	30.1191	0	0
hsa-miR-550b-2-5p	17.5	9.5	392.65	30.1191	0	0
hsa-miR-361-3p	63	10	1413.54	31.7044	0	0
hsa-miR-616-5p	31	10	695.551	31.7044	0	0
hsa-miR-183-5p	12	10	269.246	31.7044	0	0
hsa-miR-23b-5p	6	10	134.623	31.7044	0	0
hsa-miR-29c-5p	6	10	134.623	31.7044	0	0
hsa-miR-887	35	10.98	785.299	34.8114	0	0
hsa-miR-494	30	11	673.114	34.8748	0	0
hsa-miR-548h-3p	21.33	11	478.584	34.8748	0	0
hsa-miR-548z	21.33	11	478.584	34.8748	0	0
hsa-miR-30b-3p	1	11	22.4371	34.8748	0	0
hsa-miR-3607-3p	0	11	0	34.8748	1	0
hsa-miR-934	0	11	0	34.8748	1	0
hsa-miR-550a-5p	45	12	1009.67	38.0452	0	0
hsa-miR-33a-5p	25	12	560.928	38.0452	0	0
hsa-miR-4662a-5p	7	12	157.06	38.0452	0	0
hsa-miR-211-5p	0	12	0	38.0452	1	0
hsa-miR-671-5p	6	12.91	134.623	40.9303	0	0
hsa-miR-941	2253	13	50550.8	41.2157	0	0
hsa-miR-1249	15	13	336.557	41.2157	0	0
hsa-miR-16-2-3p	15	13	336.557	41.2157	0	0
hsa-miR-33b-3p	15	13	336.557	41.2157	0	0
hsa-miR-548d-5p	55.04	13.68	1234.94	43.3716	0	0
hsa-miR-214-3p	742	14	16648.3	44.3861	0	0
hsa-miR-582-5p	39	14	875.048	44.3861	0	0
hsa-miR-664-5p	3	14	67.3114	44.3861	0	0
hsa-miR-548aa	37.28	14.14	836.456	44.83	0	0
hsa-miR-548t-3p	37.28	14.14	836.456	44.83	0	0
hsa-miR-548w	35.86	14.98	804.595	47.4931	0	0
hsa-miR-375	1	15	22.4371	47.5565	0	0
hsa-miR-539-5p	5	16	112.186	50.727	0	0
hsa-miR-708-3p	4	16	89.7485	50.727	0	0
hsa-miR-1910	50	17	1121.86	53.8974	0	0
hsa-miR-2682-5p	37	17	830.174	53.8974	0	0
hsa-miR-665	11.98	17	268.797	53.8974	0	0
hsa-miR-2964a-3p	1.15	17	25.8027	53.8974	0	0
hsa-miR-21-3p	27105	18	608158	57.0679	0	0
hsa-miR-2277-5p	21	18	471.18	57.0679	0	0
hsa-miR-200c-3p	13	18	291.683	57.0679	0	0
hsa-miR-1185-5p	6	18	134.623	57.0679	0	0
hsa-miR-3605-3p	5	19	112.186	60.2383	0	0
hsa-miR-4251	0	19	0	60.2383	1	0
hsa-miR-1185-2-3p	38	19.93	852.611	63.1868	0	0
hsa-miR-2355-5p	24	20	538.491	63.4087	0	0
hsa-miR-146a-3p	69.78	20.51	1565.66	65.0256	0	0
hsa-miR-296-3p	27.02	20.98	606.251	66.5158	0	0
hsa-miR-22-5p	318	22	7135.01	69.7496	0	0
hsa-miR-34a-3p	47	22	1054.54	69.7496	0	0
hsa-miR-330-3p	18	22	403.868	69.7496	0	0
hsa-miR-1277-5p	10	22	224.371	69.7496	0	0
hsa-miR-146b-5p	7	22	157.06	69.7496	0	0
hsa-miR-454-3p	149	23	3343.13	72.92	0	0
hsa-miR-582-3p	141	23	3163.63	72.92	0	0
hsa-miR-496	37	23	830.174	72.92	0	0
hsa-miR-874	29	23	650.677	72.92	0	0
hsa-miR-190a	5	23	112.186	72.92	0	0
hsa-miR-3200-5p	0	23	0	72.92	1	0
hsa-let-7a-2-3p	24	24	538.491	76.0905	0	0
hsa-miR-625-5p	101.23	24.32	2271.31	77.105	0	0
hsa-miR-1301	26	25	583.365	79.2609	0	0
hsa-miR-193b-5p	17	25	381.431	79.2609	0	0
hsa-miR-1911-5p	0	25	0	79.2609	1	0
hsa-miR-503	104.89	25.85	2353.43	81.9558	0	0
hsa-miR-641	47	26	1054.54	82.4313	0	0
hsa-miR-141-3p	20	26	448.743	82.4313	0	0
hsa-miR-455-3p	67.59	28	1516.53	88.7722	0	0
hsa-miR-331-5p	39	28	875.048	88.7722	0	0
hsa-miR-3158-5p	0	28	0	88.7722	1	0
hsa-miR-4310	0	28	0	88.7722	1	0
hsa-miR-224-5p	75	29	1682.78	91.9427	0	0
hsa-miR-18a-3p	65	29	1458.41	91.9427	0	0
hsa-miR-1287	19	29	426.305	91.9427	0	0
hsa-miR-921	0	29	0	91.9427	1	0
hsa-miR-29a-5p	32	30	717.988	95.1131	0	0
hsa-miR-125b-2-3p	29	30	650.677	95.1131	0	0
hsa-miR-576-5p	27	30	605.802	95.1131	0	0
hsa-miR-629-5p	29.99	31	672.889	98.2835	0	0
hsa-miR-154-3p	28	31	628.24	98.2835	0	0
hsa-miR-1322	0	31	0	98.2835	1	0
hsa-miR-29b-1-5p	17.87	31.98	400.951	101.391	0	0
hsa-miR-3614-3p	0	32.3	0	102.405	1	0
hsa-miR-184	3	33	67.3114	104.624	0	0
hsa-miR-744-5p	751	34	16850.3	107.795	0	0
hsa-miR-325	0	34	0	107.795	1	0
hsa-miR-766-3p	116	35	2602.71	110.965	0	0
hsa-let-7e-3p	35.99	35	807.512	110.965	0	0
hsa-miR-3529-3p	22	35	493.617	110.965	0	0
hsa-miR-433	103	36	2311.02	114.136	0	0
hsa-miR-1197	65	38	1458.41	120.477	0	0
hsa-miR-374b-3p	37	39	830.174	123.647	0	0
hsa-miR-30c-2-3p	166	40	3724.56	126.817	0	0
hsa-miR-17-3p	72	40	1615.47	126.817	0	0
hsa-miR-30c-1-3p	63	41	1413.54	129.988	0	0
hsa-miR-542-3p	45	41	1009.67	129.988	0	0
hsa-miR-532-3p	42	41	942.359	129.988	0	0
hsa-miR-130b-5p	39	41	875.048	129.988	0	0
hsa-miR-3909	31	41	695.551	129.988	0	0
hsa-let-7a-3p	108.92	41.93	2443.85	132.936	0	0
hsa-miR-655	391	42	8772.92	133.158	0	0
hsa-miR-505-3p	152	42	3410.44	133.158	0	0
hsa-miR-194-5p	75	42	1682.78	133.158	0	0
hsa-miR-654-5p	65	43	1458.41	136.329	0	0
hsa-miR-382-3p	111	44	2490.52	139.499	0	0
hsa-miR-140-3p	52	44	1166.73	139.499	0	0
hsa-miR-195-3p	57	45	1278.92	142.67	0	0
hsa-miR-145-3p	48	45	1076.98	142.67	0	0
hsa-miR-3621	0	46	0	145.84	1	0
hsa-miR-148a-5p	17	49	381.431	155.351	0	0
hsa-miR-154-5p	237	51	5317.6	161.692	0	0
hsa-miR-3115	2	53	44.8743	168.033	0	0
hsa-miR-337-5p	46	54	1032.11	171.204	0	0
hsa-miR-15b-3p	153	55	3432.88	174.374	0	0
hsa-miR-26b-3p	64	55	1435.98	174.374	0	0
hsa-miR-181d	47.37	55.8	1062.85	176.91	0	0
hsa-miR-222-5p	946	56	21225.5	177.544	0	0
hsa-miR-628-5p	81	56	1817.41	177.544	0	0
hsa-miR-590-3p	57	56	1278.92	177.544	0	0
hsa-miR-299-5p	422.94	56.96	9489.56	180.588	0	0
hsa-miR-328	70	57.98	1570.6	183.822	0	0
hsa-miR-543	147	58	3298.26	183.885	0	0
hsa-miR-4520a-5p	0	60	0	190.226	1	0
hsa-miR-3184-5p	211.84	60.47	4753.08	191.716	0	0
hsa-let-7f-1-3p	47.04	61	1055.44	193.397	0	0
hsa-miR-181b-3p	33	61	740.425	193.397	0	0
hsa-miR-3610	0	61	0	193.397	1	0
hsa-miR-548e	90	63	2019.34	199.737	0	0
hsa-miR-26a-2-3p	55	63	1234.04	199.737	0	0
hsa-miR-4775	223	65	5003.48	206.078	0	0
hsa-miR-378a-3p	619.65	66.49	13903.2	210.802	0	0
hsa-miR-1296	121	67	2714.89	212.419	0	0
hsa-miR-1271-3p	4	67	89.7485	212.419	0	0
hsa-miR-380-3p	116.68	68	2617.96	215.59	0	0
hsa-miR-342-3p	110	68	2468.08	215.59	0	0
hsa-miR-329	283.99	68.97	6371.92	218.665	0	0
hsa-miR-1307-3p	148	69	3320.69	218.76	0	0
hsa-miR-1285-3p	154.85	73	3474.39	231.442	0	0
hsa-miR-424-3p	80	74	1794.97	234.612	0	0
hsa-miR-125a-3p	107.7	75	2416.48	237.783	0	0
hsa-let-7i-3p	56	75.99	1256.48	240.921	0	0
hsa-miR-548o-3p	119.07	78.71	2671.59	249.545	0	0
hsa-miR-664-3p	287	81	6439.45	256.805	0	0
hsa-miR-218-5p	161	81	3612.38	256.805	0	0
hsa-miR-106b-3p	407.87	82	9151.43	259.976	0	0
hsa-miR-625-3p	687.76	86.66	15431.4	274.75	0	0
hsa-miR-374b-5p	169.45	86.72	3801.97	274.94	0	0
hsa-miR-374c-3p	169.45	86.72	3801.97	274.94	0	0
hsa-miR-99b-3p	348.99	87.98	7830.33	278.935	0	0
hsa-miR-589-3p	130	93	2916.83	294.851	0	0
hsa-miR-30d-3p	90.09	93	2021.36	294.851	0	0
hsa-miR-1304-3p	447.97	93.99	10051.2	297.989	0	0
hsa-miR-23a-5p	41	94	919.922	298.021	0	0
hsa-miR-4677-3p	119	99	2670.02	313.873	0	0
hsa-miR-152	102	100	2288.59	317.044	0	0
hsa-miR-376a-5p	91	102	2041.78	323.385	0	0
hsa-miR-656	232	106	5205.41	336.066	0	0
hsa-miR-137	102	107	2288.59	339.237	0	0
hsa-miR-21-5p	110615	112	2.48188e+06	355.089	0	0
hsa-miR-30e-5p	37.04	114.69	831.071	363.617	0	0
hsa-miR-495	319	116	7157.44	367.771	0	0
hsa-miR-377-5p	282	123	6327.27	389.964	0	0
hsa-miR-1180	149	127	3343.13	402.645	0	0
hsa-miR-153	62	127	1391.1	402.645	0	0
hsa-miR-204-5p	318	128	7135.01	405.816	0	0
hsa-miR-377-3p	147	129	3298.26	408.986	0	0
hsa-miR-138-5p	174	131	3904.06	415.327	0	0
hsa-miR-376b	238.14	131.1	5343.18	415.644	0	0
hsa-miR-185-5p	248	133	5564.41	421.668	0	0
hsa-miR-379-5p	310	135	6955.51	428.009	0	0
hsa-miR-181c-5p	117	141	2625.14	447.032	0	0
hsa-miR-502-3p	172.2	141.11	3863.67	447.38	0	0
hsa-miR-450a-5p	212	144	4756.67	456.543	0	0
hsa-miR-32-3p	2	146.06	44.8743	463.074	0	0
hsa-miR-221-5p	71	150	1593.04	475.565	0	0
hsa-miR-18a-5p	220	156	4936.17	494.588	0	0
hsa-miR-1321	0	158	0	500.929	1	0
hsa-miR-376a-3p	114.83	159.88	2576.46	506.889	0	0
hsa-miR-548k	505	165	11330.7	523.122	0	0
hsa-miR-339-5p	262.99	167	5900.74	529.463	0	0
hsa-miR-140-5p	73	169	1637.91	535.804	0	0
hsa-miR-323b-3p	266	182.94	5968.28	580	0	0
hsa-miR-584-5p	491.95	189.99	11037.9	602.351	0	0
hsa-miR-331-3p	154.68	190.99	3470.57	605.522	0	0
hsa-miR-106b-5p	307	193	6888.2	611.894	0	0
hsa-miR-34c-5p	102	194	2288.59	615.065	0	0
hsa-miR-4540	0	205	0	649.939	1	0
hsa-miR-660-5p	388	206	8705.6	653.11	0	0
hsa-miR-485-5p	152	206	3410.44	653.11	0	0
hsa-miR-365a-3p	145.5	213	3264.6	675.303	0	0
hsa-miR-365b-3p	145.5	213	3264.6	675.303	0	0
hsa-miR-337-3p	255	218	5721.47	691.155	0	0
hsa-miR-149-5p	669	219	15010.4	694.326	0	0
hsa-miR-299-3p	294	221	6596.51	700.666	0	0
hsa-miR-487a	269	227	6035.59	719.689	0	0
hsa-miR-539-3p	304	229	6820.89	726.03	0	0
hsa-miR-223-3p	1	230	22.4371	729.2	0	0
hsa-miR-382-5p	383	237	8593.42	751.393	0	0
hsa-miR-379-3p	179.26	245.53	4022.08	778.437	0	0
hsa-miR-4252	0	247	0	783.098	1	0
hsa-miR-485-3p	299	249	6708.7	789.439	0	0
hsa-miR-136-5p	241	249	5407.35	789.439	0	0
hsa-miR-101-3p	184	249	4128.43	789.439	0	0
hsa-let-7d-3p	264	253.16	5923.4	802.628	0	0
hsa-miR-455-5p	419	261	9401.16	827.484	0	0
hsa-miR-1185-1-3p	303	262.07	6798.45	830.876	0	0
hsa-miR-301b	456.54	269.6	10243.4	854.75	0	0
hsa-miR-27a-5p	332	278	7449.13	881.381	0	0
hsa-miR-19a-3p	1422.55	279.8	31917.9	887.088	0	0
hsa-miR-497-5p	243	290	5452.22	919.427	0	0
hsa-miR-370	213.95	300	4800.42	951.131	0	0
hsa-miR-561-5p	1131	302	25376.4	957.472	0	0
hsa-miR-487b	840	310	18847.2	982.835	0	0
hsa-miR-107	413.87	317.43	9286.05	1006.39	0	0
hsa-miR-671-3p	204	321	4577.17	1017.71	0	0
hsa-miR-195-5p	259.06	329	5812.56	1043.07	0	0
hsa-miR-215	8.98	329	201.485	1043.07	0	0
hsa-miR-450b-5p	363	332	8144.68	1052.58	0	0
hsa-miR-374a-5p	368.11	336.55	8259.33	1067.01	0	0
hsa-miR-486-5p	862	343.98	19340.8	1090.57	0	0
hsa-miR-3690	0	357	0	1131.85	1	0
hsa-miR-424-5p	475	365	10657.6	1157.21	0	0
hsa-miR-335-5p	534	366	11981.4	1160.38	0	0
hsa-miR-29c-3p	156.88	368.92	3519.94	1169.64	0	0
hsa-miR-500a-3p	540.77	371.47	12133.3	1177.72	0	0
hsa-miR-1825	0	373	0	1182.57	1	0
hsa-miR-27b-5p	242	376	5429.78	1192.08	0	0
hsa-miR-1273a	0	379	0	1201.6	1	0
hsa-miR-376c	715	381	16042.5	1207.94	0	0
hsa-miR-4321	0	383.87	0	1217.04	1	0
hsa-miR-223-5p	0	384	0	1217.45	1	0
hsa-miR-99a-5p	779.16	397.51	17482.1	1260.28	0	0
hsa-miR-411-3p	173.73	407.47	3898	1291.86	0	0
hsa-miR-574-5p	427.84	440	9599.5	1394.99	0	0
hsa-let-7f-2-3p	530.04	446.05	11892.6	1414.17	0	0
hsa-miR-589-5p	572	467	12834	1480.59	0	0
hsa-miR-378c	3132.83	476.98	70291.7	1512.23	0	0
hsa-miR-128	1306	478	29302.9	1515.47	0	0
hsa-miR-3691-3p	0	480	0	1521.81	1	0
hsa-miR-339-3p	281	482	6304.83	1528.15	0	0
hsa-miR-23b-3p	1256.81	485.15	28199.2	1538.14	0	0
hsa-miR-193a-3p	419	486	9401.16	1540.83	0	0
hsa-miR-23c	775.13	488.36	17391.7	1548.31	0	0
hsa-miR-26b-5p	332.64	502.48	7463.49	1593.08	0	0
hsa-miR-193a-5p	75.92	503	1703.43	1594.73	0	0
hsa-miR-134	1065.99	512.99	23917.8	1626.4	0	0
hsa-miR-148b-3p	754.64	515.59	16932	1634.65	0	0
hsa-miR-30c-5p	950	521.99	21315.3	1654.94	0	0
hsa-miR-759	0	527	0	1670.82	1	0
hsa-let-7b-3p	167.96	532.84	3768.54	1689.34	0	0
hsa-miR-421	705	551	15818.2	1746.91	0	0
hsa-miR-4311	0	551	0	1746.91	1	0
hsa-miR-30e-3p	707.8	576.48	15881	1827.69	0	0
hsa-miR-29b-3p	379.99	577	8525.88	1829.34	0	0
hsa-miR-214-5p	242	601.86	5429.78	1908.16	0	0
hsa-miR-532-5p	980	608	21988.4	1927.63	0	0
hsa-miR-493-5p	1371	623	30761.3	1975.18	0	0
hsa-miR-5010-3p	0	635.41	0	2014.53	1	0
hsa-miR-493-3p	686	648.99	15391.9	2057.58	0	0
hsa-miR-145-5p	1240	652	27822	2067.12	0	0
hsa-miR-15b-5p	1070.04	653	24008.6	2070.29	0	0
hsa-miR-3611	3	663	67.3114	2102	0	0
hsa-miR-130b-3p	1386.13	663.1	31100.8	2102.32	0	0
hsa-miR-20a-5p	675.96	675.16	15166.6	2140.55	0	0
hsa-miR-30d-5p	270.07	676.84	6059.59	2145.88	0	0
hsa-miR-17-5p	709.95	683.84	15929.2	2168.07	0	0
hsa-miR-335-3p	456	698	10231.3	2212.96	0	0
hsa-miR-1260a	0	704	0	2231.99	1	0
hsa-miR-937	14	709	314.12	2247.84	0	0
hsa-miR-15a-5p	663.96	714.99	14897.4	2266.83	0	0
hsa-miR-409-5p	1029	731	23087.8	2317.59	0	0
hsa-miR-3074-5p	661.85	731.02	14850	2317.65	0	0
hsa-miR-374a-3p	775	749	17388.8	2374.66	0	0
hsa-miR-34a-5p	1339.97	767	30065.1	2431.72	0	0
hsa-miR-193b-3p	922	805	20687	2552.2	0	0
hsa-miR-889	1604	807	35989.1	2558.54	0	0
hsa-miR-30a-3p	1401.1	831.52	31436.7	2636.28	0	0
hsa-miR-345-5p	1174	908	26341.2	2878.76	0	0
hsa-miR-758	546	935.99	12250.7	2967.5	0	0
hsa-miR-340-5p	937	958	21023.6	3037.28	0	0
hsa-miR-192-5p	1865.02	968	41845.7	3068.98	0	0
hsa-miR-301a-3p	1302.46	987.4	29223.5	3130.49	0	0
hsa-miR-1307-5p	1245	1009	27934.2	3198.97	0	0
hsa-miR-155-5p	2190	1015	49137.3	3217.99	0	0
hsa-miR-935	542	1038	12160.9	3290.91	0	0
hsa-miR-19b-3p	3146.45	1048.2	70597.3	3323.25	0	0
hsa-miR-484	934.98	1070	20978.3	3392.37	0	0
hsa-miR-1972	3.91	1124	87.7292	3563.57	0	0
hsa-miR-320c	1.43	1141.98	32.0851	3620.57	0	0
hsa-miR-28-5p	1123	1155	25196.9	3661.85	0	0
hsa-let-7c	1590.03	1163.17	35675.7	3687.76	0	0
hsa-miR-30b-5p	1258	1218	28225.9	3861.59	0	0
hsa-miR-24-3p	663.14	1346.98	14879	4270.51	0	0
hsa-miR-30a-5p	1302.89	1429.47	29233.1	4532.04	0	0
hsa-let-7d-5p	1871.2	1464.35	41984.3	4642.63	0	0
hsa-miR-3184-3p	2006.99	1522.99	45031.1	4828.54	0	0
hsa-miR-423-5p	2006.99	1522.99	45031.1	4828.54	0	0
hsa-miR-100-3p	911	1636	20440.2	5186.83	0	0
hsa-miR-574-3p	2082	1918	46714.1	6080.9	0	0
hsa-miR-942	8	1921	179.497	6090.41	0	0
hsa-miR-130a-3p	2304.87	2028.65	51714.7	6431.71	0	0
hsa-miR-2113	0	2075	0	6578.66	1	0
hsa-miR-181a-2-3p	1533	2261.01	34396.1	7168.39	0	0
hsa-miR-199b-5p	4300.61	2471.26	96493.3	7834.97	0	0
hsa-miR-769-5p	2906	2494	65202.3	7907.07	0	0
hsa-miR-181a-3p	3024.86	2525.89	67869.2	8008.17	0	0
hsa-miR-125b-1-3p	3441.95	2804	77227.5	8889.9	0	0
hsa-miR-10b-5p	3645.02	2897.86	81783.8	9187.48	0	0
hsa-miR-148a-3p	1001.09	2978.27	22461.6	9442.42	0	0
hsa-miR-410	6371	3163	142947	10028.1	0	0
hsa-miR-1260b	0	3177	0	10072.5	1	0
hsa-miR-25-3p	8914.06	3269.01	200006	10364.2	0	0
hsa-miR-3116	0	3277	0	10389.5	1	0
hsa-miR-23a-3p	4406.14	3540.83	98861.1	11226	0	0
hsa-miR-151a-3p	6795.99	3768	152482	11946.2	0	0
hsa-miR-136-3p	3204	3808	71888.5	12073	0	0
hsa-miR-103a-3p	3845.56	3857.78	86283.3	12230.8	0	0
hsa-miR-103b	3845.56	3857.78	86283.3	12230.8	0	0
hsa-miR-423-3p	3231.11	4317.5	72496.8	13688.4	0	0
hsa-miR-409-3p	6112.99	4789	137158	15183.2	0	0
hsa-miR-186-5p	13020	4856	292131	15395.6	0	0
hsa-miR-98	2747.13	5033.62	61637.7	15958.8	0	0
hsa-miR-181b-5p	5348.61	5167.04	120007	16381.8	0	0
hsa-miR-199a-5p	6228.39	5783.74	139747	18337	0	0
hsa-miR-381	12449	6591	279320	20896.3	0	0
hsa-let-7e-5p	5536.01	6881.34	124212	21816.9	0	0
hsa-miR-654-3p	5114.99	7029	114766	22285	0	0
hsa-miR-146a-5p	9078	7476	203684	23702.2	0	0
hsa-miR-28-3p	8207.17	8042.6	184145	25498.6	0	0
hsa-let-7b-5p	11192.2	8294.09	251122	26295.9	0	0
hsa-let-7g-5p	5925.88	9116.92	132960	28904.6	0	0
hsa-miR-29a-3p	8233.13	9448.08	184728	29954.5	0	0
hsa-miR-151a-5p	14418.8	10147.4	323517	32171.7	0	0
hsa-miR-411-5p	4607	10173	103368	32252.8	0	0
hsa-miR-199a-3p	22702.5	10978	509379	34805	0	0
hsa-miR-199b-3p	22702.5	10978	509379	34805	0	0
hsa-miR-222-3p	407.98	11265	9153.9	35715	0	0
hsa-miR-933	1	11460.5	22.4371	36334.8	0	0
hsa-miR-27a-3p	12770.2	13093.9	286527	41513.2	0	0
hsa-miR-10a-5p	23181.2	13798	520120	43745.8	0	0
hsa-miR-210	1417.97	18058	31815.2	57251.7	0	0
hsa-miR-125b-5p	10071	18090	225964	57353.2	0	0
hsa-miR-92b-5p	3.99	19226.5	89.5241	60956.2	0	0
hsa-miR-16-5p	16836.9	19306	377773	61208.4	0	0
hsa-miR-125a-5p	9988	20064	224102	63611.6	0	0
hsa-let-7i-5p	41035.3	21567.5	920715	68378.5	0	0
hsa-miR-99b-5p	66373.2	30000.1	1.48922e+06	95113.5	0	0
hsa-miR-143-3p	71906	32437	1.61336e+06	102839	0	0
hsa-let-7f-5p	26256.8	41883.9	589127	132790	0	0
hsa-miR-1911-3p	0	47728	0	151319	1	0
hsa-miR-1270	2	51660	44.8743	163785	0	0
hsa-miR-181a-5p	51007	68060.1	1.14445e+06	215780	0	0
hsa-miR-26a-5p	77686.4	74736.5	1.74306e+06	236947	0	0
hsa-miR-27b-3p	122719	98765.1	2.75346e+06	313129	0	0
hsa-miR-2110	3	101623	67.3114	322189	0	0
hsa-let-7a-5p	73063.3	139588	1.63933e+06	442555	0	0
hsa-miR-100-5p	436895	294740	9.80268e+06	934456	0	0
hsa-miR-221-3p	44569	315414	1000000	1000000	0	0

## Sheet: RATIO EXO_CELL (2)
gene_id	exosomes	cells	ratio E/C
hsa-miR-2110	101623	4	25405.8
hsa-miR-1911-3p	47728	2	23864
hsa-miR-199a-3p	10978	1	10978
hsa-miR-411-5p	10173	1	10173
hsa-let-7b-5p	8294.09	1	8294.09
hsa-let-7a-5p	139588	21.33	6544.22
hsa-miR-151a-3p	3768	1	3768
hsa-miR-151a-5p	10147.4	3	3382.47
hsa-miR-125a-5p	20064	6	3344
hsa-miR-10a-5p	13798	5	2759.61
hsa-miR-221-3p	315414	119.17	2646.76
hsa-miR-181a-5p	68060.1	31	2195.49
hsa-miR-26a-5p	74736.5	37.14	2012.29
hsa-miR-1270	51660	27.12	1904.87
hsa-miR-98	5033.62	3	1677.87
hsa-let-7i-5p	21567.5	15	1437.84
hsa-miR-103a-3p	3857.78	3	1285.93
hsa-let-7c	1163.17	1	1163.17
hsa-miR-1307-5p	1009	1	1009
hsa-let-7e-5p	6881.34	7	983.049
hsa-miR-10b-5p	2897.86	4	724.465
hsa-miR-145-5p	652	1	652
hsa-miR-769-5p	2494	3.99	625.063
hsa-let-7g-5p	9116.92	15	607.795
hsa-miR-125b-1-3p	2804	5	560.8
hsa-miR-30c-5p	521.99	1	521.99
hsa-miR-935	1038	2	519
hsa-miR-148b-3p	515.59	1	515.59
hsa-miR-143-3p	32437	65	499.031
hsa-miR-3691-3p	480	1	480
hsa-miR-125b-5p	18090	38	476.053
hsa-miR-100-5p	294740	742	397.224
hsa-miR-4321	383.87	1	383.87
hsa-miR-29c-3p	368.92	1	368.92
hsa-miR-3690	357	1	357
hsa-miR-107	317.43	1	317.43
hsa-miR-27b-3p	98765.1	318	310.582
hsa-miR-561-5p	302	1	302
hsa-miR-19a-3p	279.8	1	279.8
hsa-miR-16-5p	19306	72	268.139
hsa-miR-146a-5p	7476	29	257.793
hsa-let-7d-3p	253.16	1	253.16
hsa-miR-382-5p	237	1	237
hsa-miR-199b-3p	10978	47.14	232.881
hsa-miR-365a-3p	213	1	213
hsa-miR-140-5p	169	1	169
hsa-miR-376a-3p	159.88	1	159.88
hsa-miR-18a-5p	156	1	156
hsa-miR-210	18058	121	149.24
hsa-miR-32-3p	146.06	1	146.06
hsa-miR-153	127	1	127
hsa-miR-103b	3857.78	37.28	103.481
hsa-miR-345-5p	908	8.98	101.114
hsa-miR-148a-3p	2978.27	29.99	99.3088
hsa-miR-27a-3p	13093.9	149	87.8783
hsa-miR-186-5p	4856	57	85.193
hsa-miR-130a-3p	2028.65	24	84.5271
hsa-miR-495	116	1.43	81.1189
hsa-miR-136-3p	3808	47	81.0213
hsa-miR-199b-5p	2471.26	33	74.8867
hsa-let-7f-2-3p	446.05	6	74.3417
hsa-miR-222-3p	11265	161	69.9689
hsa-miR-380-3p	68	1	68
hsa-miR-181a-3p	2525.89	39	64.7664
hsa-let-7f-1-3p	61	1	61
hsa-miR-543	58	1	58
hsa-miR-181a-2-3p	2261.01	42	53.8336
hsa-miR-28-3p	8042.6	174	46.2218
hsa-miR-155-5p	1015	22	46.1364
hsa-miR-1260b	3177	69.78	45.5288
hsa-miR-29a-3p	9448.08	212	44.5664
hsa-miR-140-3p	44	1	44
hsa-miR-128	478	11	43.4545
hsa-miR-381	6591	167.96	39.2415
hsa-miR-3529-3p	35	1	35
hsa-let-7d-5p	1464.35	45	32.5411
hsa-miR-3614-3p	32.3	1	32.3
hsa-miR-1322	31	1	31
hsa-miR-125b-2-3p	30	1	30
hsa-miR-100-3p	1636	55.14	29.6699
hsa-miR-1260a	704	24	29.3333
hsa-miR-199a-5p	5783.74	211.84	27.3024
hsa-let-7b-3p	532.84	21.33	24.9808
hsa-miR-424-3p	74	3	24.6667
hsa-miR-3200-5p	23	1	23
hsa-let-7f-5p	41883.9	2253	18.5903
hsa-miR-2113	2075	116.68	17.7837
hsa-miR-15b-5p	653	37	17.6486
hsa-miR-708-3p	16	1	16
hsa-miR-1185-5p	18	1.15	15.6522
hsa-miR-17-5p	683.84	45	15.1964
hsa-miR-29a-5p	30	2	15
hsa-miR-24-3p	1346.98	91	14.802
hsa-miR-25-3p	3269.01	232	14.0906
hsa-miR-1307-3p	69	5	13.8
hsa-miR-181b-5p	5167.04	391	13.2149
hsa-miR-409-3p	4789	379.99	12.603
hsa-miR-149-5p	219	17.87	12.2552
hsa-miR-136-5p	249	21	11.8571
hsa-miR-19b-3p	1048.2	91	11.5187
hsa-miR-30a-3p	831.52	73	11.3907
hsa-miR-548z	11	1	11
hsa-miR-934	11	1	11
hsa-miR-193a-5p	503	47.37	10.6185
hsa-miR-1285-3p	73	7	10.4286
hsa-miR-1321	158	17	9.29412
hsa-miR-301a-3p	987.4	114.83	8.5988
hsa-miR-1273a	379	47	8.06383
hsa-miR-23a-3p	3540.83	447.97	7.90417
hsa-miR-30b-5p	1218	154.68	7.87432
hsa-miR-1972	1124	147	7.64626
hsa-miR-193a-3p	486	64	7.59375
hsa-miR-1185-1-3p	262.07	37	7.08297
hsa-miR-1908	7	1	7
hsa-miR-101-3p	249	39	6.38462
hsa-miR-15a-5p	714.99	113	6.32735
hsa-miR-192-5p	968	153	6.3268
hsa-miR-130b-3p	663.1	111.23	5.96152
hsa-miR-125a-3p	75	13	5.76923
hsa-miR-1825	373	65	5.73846
hsa-miR-3184-3p	1522.99	269	5.66167
hsa-miR-106b-5p	193	35.86	5.38204
hsa-miR-30a-5p	1429.47	266	5.37395
hsa-let-7i-3p	75.99	15	5.066
hsa-miR-96-5p	5	1	5
hsa-miR-3116	3277	669	4.89836
hsa-miR-28-5p	1155	238.14	4.85009
hsa-miR-195-5p	329	71	4.6338
hsa-miR-27a-5p	278	62	4.48387
hsa-miR-340-5p	958	214	4.47664
hsa-miR-134	512.99	114.89	4.46505
hsa-miR-30d-5p	676.84	152	4.45289
hsa-miR-23c	488.36	112	4.36036
hsa-miR-374a-3p	749	173.73	4.31129
hsa-miR-23b-3p	485.15	119	4.07689
hsa-miR-215	329	81	4.06173
hsa-miR-3942-5p	4	1	4
hsa-miR-30e-3p	576.48	145.5	3.96206
hsa-miR-214-5p	601.86	154.85	3.88673
hsa-miR-3130-3p	7	2	3.5
hsa-miR-590-5p	7	2	3.5
hsa-miR-423-3p	4317.5	1241	3.47905
hsa-miR-138-5p	131	39	3.35897
hsa-miR-1304-3p	93.99	29	3.24103
hsa-miR-410	3163	981	3.22426
hsa-miR-409-5p	731	242	3.02066
hsa-miR-4523	3	1	3
hsa-miR-4665-5p	3	1	3
hsa-miR-592	3	1	3
hsa-miR-320c	1141.98	383	2.98167
hsa-miR-494	11	3.91	2.8133
hsa-miR-3074-5p	731.02	262.99	2.77965
hsa-miR-29b-3p	577	221	2.61086
hsa-miR-433	36	14	2.57143
hsa-miR-27b-5p	376	147	2.55782
hsa-miR-185-5p	133	52	2.55769
hsa-miR-1180	127	51	2.4902
hsa-miR-145-3p	45	19	2.36842
hsa-miR-3620	7	3	2.33333
hsa-miR-3929	7	3	2.33333
hsa-miR-23a-5p	94	41	2.29268
hsa-miR-223-5p	384	169.45	2.26616
hsa-miR-339-3p	482	213.95	2.25286
hsa-miR-106b-3p	82	37.28	2.19957
hsa-miR-548au-5p	5.92	2.78	2.1295
hsa-miR-34a-5p	767	368.11	2.08362
hsa-miR-539-5p	16	8	2
hsa-miR-3679-5p	6	3	2
hsa-miR-1226-3p	4	2	2
hsa-miR-1304-5p	2	1	2
hsa-miR-142-3p	2	1	2
hsa-miR-3074-3p	2	1	2
hsa-miR-3944-5p	2	1	2
hsa-miR-4504	2	1	2
hsa-miR-5001-3p	2	1	2
hsa-miR-545-5p	2	1	2
hsa-miR-548ar-3p	2	1	2
hsa-miR-299-3p	221	117	1.88889
hsa-miR-26b-5p	502.48	282	1.78184
hsa-miR-148a-5p	49	28	1.75
hsa-miR-24-1-5p	7	4	1.75
hsa-miR-23b-5p	10	6	1.66667
hsa-miR-29c-5p	10	6	1.66667
hsa-miR-1185-2-3p	19.93	11.98	1.66361
hsa-miR-548aj-5p	1.76	1.1	1.6
hsa-miR-548g-5p	1.76	1.1	1.6
hsa-miR-548x-5p	1.76	1.1	1.6
hsa-miR-137	107	67.59	1.58307
hsa-miR-130b-5p	41	26	1.57692
hsa-miR-335-3p	698	456.54	1.52889
hsa-miR-187-3p	3	2	1.5
hsa-miR-4725-3p	3	2	1.5
hsa-miR-218-5p	81	56	1.44643
hsa-miR-154-5p	51	35.99	1.41706
hsa-let-7e-3p	35	25	1.4
hsa-miR-659-5p	7	5	1.4
hsa-miR-190a	23	17	1.35294
hsa-let-7a-3p	41.93	31	1.35258
hsa-miR-146b-3p	8	6	1.33333
hsa-miR-4761-3p	4	3	1.33333
hsa-miR-628-3p	4	3	1.33333
hsa-miR-423-5p	1522.99	1171.14	1.30043
hsa-miR-548i	5.21	4.15	1.25542
hsa-miR-188-3p	5	4	1.25
hsa-miR-19a-5p	5	4	1.25
hsa-miR-3127-5p	5	4	1.25
hsa-miR-3611	663	541.77	1.22377
hsa-miR-1277-5p	22	18	1.22222
hsa-miR-4311	551	456	1.20833
hsa-miR-624-5p	6	5	1.2
hsa-miR-1343	7	6	1.16667
hsa-miR-484	1070	937	1.14194
hsa-miR-335-5p	366	332	1.10241
hsa-miR-20a-5p	675.16	619.65	1.08958
hsa-miR-323b-3p	182.94	179.26	1.02053
hsa-miR-548ah-3p	5.95	5.91	1.00677
hsa-miR-185-3p	6	6	1
hsa-miR-340-3p	6	6	1
hsa-miR-19b-1-5p	5	5	1
hsa-miR-3177-3p	3	3	1
hsa-miR-586	3	3	1
hsa-miR-1244	2	2	1
hsa-miR-491-3p	2	2	1
hsa-miR-1277-3p	1	1	1
hsa-miR-196a-5p	1	1	1
hsa-miR-196b-5p	1	1	1
hsa-miR-200a-3p	1	1	1
hsa-miR-3064-5p	1	1	1
hsa-miR-3160-3p	1	1	1
hsa-miR-326	1	1	1
hsa-miR-338-5p	1	1	1
hsa-miR-3619-5p	1	1	1
hsa-miR-4647	1	1	1
hsa-miR-4677-5p	1	1	1
hsa-miR-4773	1	1	1
hsa-miR-4787-3p	1	1	1
hsa-miR-5695	1	1	1
hsa-miR-5010-3p	635.41	663.14	0.958184
hsa-miR-21-5p	112	117.7	0.951572
hsa-miR-5699	0.93	1	0.93
hsa-miR-181c-5p	141	152	0.927632
hsa-miR-4252	247	271.17	0.910868
hsa-miR-376c	381	419	0.909308
hsa-miR-378a-3p	66.49	75.92	0.87579
hsa-miR-4510	0.99	1.15	0.86087
hsa-miR-193b-3p	805	946	0.850951
hsa-miR-15b-3p	55	65	0.846154
hsa-miR-183-5p	10	12	0.833333
hsa-miR-651	9	11	0.818182
hsa-miR-146b-5p	22	27	0.814815
hsa-miR-421	551	686	0.803207
hsa-miR-30e-5p	114.69	145.5	0.788247
hsa-miR-374a-5p	336.55	427.84	0.786626
hsa-miR-654-3p	7029	9178	0.765853
hsa-miR-1284	3	4	0.75
hsa-miR-148b-5p	3	4	0.75
hsa-miR-181d	55.8	75	0.744
hsa-miR-548u	6.99	9.43	0.741251
hsa-miR-194-5p	42	57	0.736842
hsa-let-7a-2-3p	24	35	0.685714
hsa-miR-1301	25	37	0.675676
hsa-miR-99b-5p	30000.1	44569	0.673116
hsa-miR-532-5p	608	911	0.667398
hsa-miR-24-2-5p	6	9	0.666667
hsa-miR-301a-5p	6	9	0.666667
hsa-miR-1245b-3p	2	3	0.666667
hsa-miR-186-3p	2	3	0.666667
hsa-miR-3145-5p	2	3	0.666667
hsa-miR-3157-5p	2	3	0.666667
hsa-miR-3928	2	3	0.666667
hsa-miR-4785	2	3	0.666667
hsa-miR-4786-5p	2	3	0.666667
hsa-miR-493-5p	623	934.98	0.666324
hsa-miR-146a-3p	20.51	32	0.640938
hsa-miR-17-3p	40	63	0.634921
hsa-miR-548at-5p	2	3.18	0.628931
hsa-miR-1249	13	21	0.619048
hsa-miR-18a-3p	29	48	0.604167
hsa-miR-1293	3	4.99	0.601202
hsa-miR-103a-2-5p	3	5	0.6
hsa-miR-302d-3p	3	5	0.6
hsa-miR-4768-5p	3	5	0.6
hsa-miR-4746-5p	7	12	0.583333
hsa-miR-204-5p	128	223	0.573991
hsa-miR-487b	310	542	0.571956
hsa-miR-143-5p	8	14	0.571429
hsa-miR-542-5p	9	16	0.5625
hsa-miR-644b-3p	5	9	0.555556
hsa-miR-770-5p	6	11	0.545455
hsa-miR-1911-5p	25	46	0.543478
hsa-miR-550a-3p	9.5	17.5	0.542857
hsa-miR-550b-2-5p	9.5	17.5	0.542857
hsa-miR-1254	4.84	9	0.537778
hsa-miR-10a-3p	8	15	0.533333
hsa-miR-378d	0.99	1.87	0.529412
hsa-miR-301b	269.6	515	0.523495
hsa-miR-221-5p	150	287	0.522648
hsa-miR-181b-3p	61	118.92	0.51295
hsa-miR-668	2	3.99	0.501253
hsa-miR-548l	3	6	0.5
hsa-let-7g-3p	2	4	0.5
hsa-miR-216a	2	4	0.5
hsa-miR-3180-3p	2	4	0.5
hsa-miR-34c-3p	2	4	0.5
hsa-miR-3128	1	2	0.5
hsa-miR-3140-3p	1	2	0.5
hsa-miR-3175	1	2	0.5
hsa-miR-3913-3p	1	2	0.5
hsa-miR-3913-5p	1	2	0.5
hsa-miR-449c-5p	1	2	0.5
hsa-miR-4741	1	2	0.5
hsa-miR-4742-3p	1	2	0.5
hsa-miR-5000-3p	1	2	0.5
hsa-miR-549	1	2	0.5
hsa-miR-877-3p	1	2	0.5
hsa-miR-1273d	0.97	1.99	0.487437
hsa-miR-1296	67	141	0.475177
hsa-miR-548h-5p	4.03	8.52	0.473005
hsa-miR-3200-3p	6	13	0.461538
hsa-miR-33a-3p	6	13	0.461538
hsa-miR-331-3p	190.99	419	0.455823
hsa-miR-29b-1-5p	31.98	71	0.450423
hsa-miR-933	11460.5	26256.8	0.436478
hsa-miR-574-3p	1918	4416.14	0.434316
hsa-miR-1306-5p	3	7	0.428571
hsa-miR-378c	476.98	1165.99	0.409077
hsa-miR-1303	2	5	0.4
hsa-miR-548a-3p	2	5	0.4
hsa-miR-3610	61	156.88	0.388832
hsa-miR-370	300	779.16	0.38503
hsa-miR-365a-5p	3	8	0.375
hsa-miR-329	68.97	184	0.374837
hsa-miR-759	527	1417.97	0.371658
hsa-miR-181c-3p	6.95	18.73	0.371062
hsa-miR-377-5p	123	332.64	0.369769
hsa-miR-4645-3p	4	11	0.363636
hsa-miR-769-3p	4	11	0.363636
hsa-miR-376a-5p	102	281	0.362989
hsa-miR-330-5p	9	25	0.36
hsa-miR-30c-2-3p	40	112	0.357143
hsa-miR-4448	1	2.87	0.348432
hsa-miR-141-3p	26	75	0.346667
hsa-miR-4685-3p	1	2.99	0.334448
hsa-miR-223-3p	230	687.76	0.334419
hsa-miR-576-3p	4	12	0.333333
hsa-miR-219-1-3p	2	6	0.333333
hsa-miR-2355-3p	2	6	0.333333
hsa-miR-9-5p	2	6	0.333333
hsa-miR-188-5p	1	3	0.333333
hsa-miR-302c-3p	1	3	0.333333
hsa-miR-3173-5p	1	3	0.333333
hsa-miR-4642	1	3	0.333333
hsa-miR-4707-3p	1	3	0.333333
hsa-miR-584-3p	1	3	0.333333
hsa-miR-642a-5p	1	3	0.333333
hsa-miR-644b-5p	1	3	0.333333
hsa-miR-299-5p	56.96	172.2	0.330778
hsa-miR-200c-3p	18	55	0.327273
hsa-miR-379-3p	245.53	754.64	0.32536
hsa-miR-616-5p	10	31	0.322581
hsa-miR-193b-5p	25	81	0.308642
hsa-miR-548aq-3p	5.61	18.68	0.300321
hsa-miR-365b-3p	213	715	0.297902
hsa-miR-184	33	111	0.297297
hsa-miR-411-3p	407.47	1371	0.297206
hsa-miR-500a-3p	371.47	1258	0.295286
hsa-miR-450b-5p	332	1129	0.294066
hsa-miR-4435	6	21	0.285714
hsa-miR-500a-5p	6	21	0.285714
hsa-miR-5581-3p	2	7	0.285714
hsa-miR-548am-5p	1.78	6.36	0.279874
hsa-miR-548c-5p	1.78	6.36	0.279874
hsa-miR-548o-5p	1.78	6.36	0.279874
hsa-miR-486-5p	343.98	1245	0.276289
hsa-miR-3605-5p	7	26	0.269231
hsa-miR-92b-5p	19226.5	71916	0.267346
hsa-miR-154-3p	31	116	0.267241
hsa-miR-4540	205	775	0.264516
hsa-miR-424-5p	365	1386.13	0.263323
hsa-miR-139-5p	5	19	0.263158
hsa-miR-342-3p	68	259.16	0.262386
hsa-miR-422a	0.78	3	0.26
hsa-miR-3174	3	12	0.25
hsa-miR-605	3	12	0.25
hsa-miR-3661	2	8	0.25
hsa-miR-1228-3p	1	4	0.25
hsa-miR-3065-3p	1	4	0.25
hsa-miR-4687-5p	1	4	0.25
hsa-miR-541-3p	1	4	0.25
hsa-miR-598	1	4	0.25
hsa-miR-1255a	8	33	0.242424
hsa-miR-328	57.98	241	0.240581
hsa-miR-30d-3p	93	388	0.239691
hsa-miR-3940-3p	3	13	0.230769
hsa-miR-541-5p	5	22	0.227273
hsa-miR-34c-5p	194	862	0.225058
hsa-miR-4661-5p	2	8.99	0.222469
hsa-miR-337-5p	54	243	0.222222
hsa-miR-580	4	18	0.222222
hsa-miR-302b-3p	2	9	0.222222
hsa-miR-2355-5p	20	91.19	0.219322
hsa-miR-450a-5p	144	663.96	0.216881
hsa-miR-1271-3p	67	318	0.210692
hsa-miR-1294	4	19	0.210526
hsa-miR-3115	53	255	0.207843
hsa-miR-493-3p	648.99	3146.45	0.206261
hsa-miR-561-3p	4	19.98	0.2002
hsa-miR-138-1-3p	3	15	0.2
hsa-miR-302a-3p	1	5	0.2
hsa-miR-3912	1	5	0.2
hsa-miR-548s	1	5	0.2
hsa-miR-1287	29	149	0.194631
hsa-miR-3184-5p	60.47	314	0.19258
hsa-miR-3621	46	242	0.190083
hsa-miR-142-5p	5	27	0.185185
hsa-miR-497-5p	290	1591.13	0.18226
hsa-miR-135b-5p	2	11	0.181818
hsa-miR-629-3p	6	33.11	0.181214
hsa-miR-4454	5	28	0.178571
hsa-miR-627	3	17	0.176471
hsa-miR-26b-3p	55	319	0.172414
hsa-miR-224-5p	29	169.45	0.171142
hsa-miR-296-5p	2	12	0.166667
hsa-miR-365b-5p	1	6	0.166667
hsa-miR-377-3p	129	775.13	0.166424
hsa-miR-455-5p	261	1614	0.16171
hsa-miR-652-3p	9	56	0.160714
hsa-miR-361-3p	10	63	0.15873
hsa-miR-485-5p	206	1312.46	0.156957
hsa-miR-877-5p	2.77	17.98	0.15406
hsa-miR-337-3p	218	1422.55	0.153246
hsa-miR-2682-5p	17	112	0.151786
hsa-miR-374b-5p	86.72	572	0.151608
hsa-miR-339-5p	167	1131	0.147657
hsa-miR-2467-5p	9	61	0.147541
hsa-miR-379-5p	135	951	0.141956
hsa-miR-2277-5p	18	131	0.137405
hsa-miR-548aq-5p	1	7.39	0.135318
hsa-miR-222-5p	56	417.87	0.134013
hsa-miR-485-3p	249	1865.12	0.133503
hsa-miR-99a-3p	2	15	0.133333
hsa-miR-152	100	751	0.133156
hsa-miR-30c-1-3p	41	317	0.129338
hsa-miR-3129-3p	2	16	0.125
hsa-miR-3677-3p	5	41	0.121951
hsa-miR-4775	65	546	0.119048
hsa-miR-26a-1-3p	5	43	0.116279
hsa-miR-325	34	299	0.113712
hsa-miR-3934	1	9	0.111111
hsa-miR-211-5p	12	111	0.108108
hsa-miR-502-3p	141.11	1312.89	0.10748
hsa-miR-195-3p	45	422.94	0.106398
hsa-miR-539-3p	229	2182	0.10495
hsa-miR-376b	131.1	1256.81	0.104312
hsa-miR-487a	227	2191	0.103606
hsa-miR-3158-5p	28	294	0.0952381
hsa-miR-214-3p	14	148	0.0945946
hsa-miR-4520a-5p	60	661.85	0.090655
hsa-miR-331-5p	28	313	0.0894569
hsa-miR-296-3p	20.98	248	0.0845968
hsa-miR-4677-3p	99	1174	0.0843271
hsa-miR-330-3p	22	264	0.0833333
hsa-miR-16-2-3p	13	166	0.0783133
hsa-miR-374b-3p	39	531.14	0.073427
hsa-miR-1910	17	237	0.07173
hsa-miR-378a-5p	1	15	0.0666667
hsa-miR-574-5p	440	6795.99	0.0647441
hsa-miR-21-3p	18	283.99	0.0633825
hsa-miR-22-5p	22	348.99	0.0630391
hsa-miR-382-3p	44	715	0.0615385
hsa-miR-548n	1	16.28	0.0614251
hsa-miR-34a-3p	22	363	0.0606061
hsa-miR-584-5p	189.99	3231.11	0.0588002
hsa-miR-3909	41	717.8	0.057119
hsa-miR-2964a-3p	17	311	0.0546624
hsa-miR-548k	165	3441.95	0.0479379
hsa-miR-212-3p	1	21	0.047619
hsa-miR-758	935.99	23181.2	0.040377
hsa-miR-3605-3p	19	475	0.04
hsa-miR-4310	28	719.95	0.0388916
hsa-miR-589-5p	467	13120	0.0355945
hsa-miR-33b-3p	13	413.87	0.0314108
hsa-miR-671-5p	12.91	417.98	0.0308866
hsa-miR-455-3p	28	922	0.0303688
hsa-miR-4251	19	675.96	0.0281082
hsa-miR-374c-3p	86.72	3132.83	0.027681
hsa-miR-660-5p	206	8233.13	0.0250209
hsa-miR-30b-3p	11	491.95	0.02236
hsa-miR-548e	63	2916	0.0216049
hsa-miR-548o-3p	78.71	3645.12	0.0215933
hsa-miR-3607-3p	11	534	0.0205993
hsa-miR-496	23	1123	0.0204809
hsa-miR-590-3p	56	2747.13	0.0203849
hsa-miR-708-5p	0.5	25	0.02
hsa-miR-505-3p	42	2116.99	0.0198395
hsa-miR-889	807	41135.3	0.0196182
hsa-miR-532-3p	41	2116.99	0.0193671
hsa-miR-656	106	5925.88	0.0178876
hsa-miR-542-3p	41	2314.87	0.0177116
hsa-miR-454-3p	23	1339.97	0.0171646
hsa-miR-625-3p	86.66	5348.61	0.0162023
hsa-miR-942	1921	122719	0.0156537
hsa-miR-589-3p	93	6112.99	0.0152135
hsa-miR-1271-5p	6	414.96	0.0144592
hsa-miR-33a-5p	12	841	0.0142687
hsa-miR-671-3p	321	22712.5	0.0141332
hsa-miR-937	709	51117	0.0138701
hsa-miR-503	25.85	1871.2	0.0138147
hsa-miR-548t-3p	14.14	1111.19	0.0127251
hsa-miR-375	15	1316	0.0113982
hsa-miR-576-5p	30	3214	0.00933416
hsa-miR-548aa	14.14	1533	0.00922374
hsa-miR-4662a-5p	12	1411.1	0.008504
hsa-miR-582-3p	23	3845.56	0.00598092
hsa-miR-664-3p	81	14418.8	0.00561765
hsa-miR-629-5p	31	5536.11	0.0055996
hsa-miR-99a-5p	397.51	73163.3	0.00543319
hsa-miR-654-5p	43	8217.17	0.00523295
hsa-miR-641	26	5114.99	0.0050831
hsa-miR-628-5p	56	12449	0.00449835
hsa-miR-625-5p	24.32	6228.39	0.0039047
hsa-miR-655	42	11192.2	0.0037526
hsa-miR-582-5p	14	3845.56	0.00364056
hsa-miR-548h-3p	11	3124.86	0.00352016
hsa-miR-548d-5p	13.68	4311.61	0.00317283
hsa-miR-766-3p	35	11171	0.00313311
hsa-miR-664-5p	14	4617	0.00303227
hsa-miR-744-5p	34	12771.2	0.00266223
hsa-miR-548w	14.98	6371	0.00235128
hsa-miR-1197	38	27115	0.00140144
hsa-miR-361-5p	1	727	0.00137552
hsa-miR-874	23	16836.9	0.00136604
hsa-miR-550a-5p	12	8914.16	0.00134617
hsa-miR-197-3p	2.43	1917	0.00126761
hsa-miR-887	10.98	9988	0.00109932
hsa-miR-665	17	22712.5	0.000748487
hsa-miR-126-3p	3	5189	0.000578146
hsa-miR-26a-2-3p	63	111615	0.00056444
hsa-miR-921	29	66373.2	0.000436923
hsa-miR-99b-3p	87.98	436895	0.000201375
hsa-miR-92a-3p	7	39385.9	0.000177729
hsa-miR-941	13	77686.4	0.00016734
hsa-miR-127-3p	5.09	77188	6.59429e-05
hsa-miR-93-3p	0	11	0
hsa-miR-1262	0	12	0
hsa-miR-3152-5p	0	14	0
hsa-miR-191-3p	0	16	0
hsa-miR-3158-3p	0	16	0
hsa-miR-501-5p	0	17.93	0
hsa-miR-132-5p	0	18	0
hsa-miR-224-3p	0	18	0
hsa-miR-212-5p	0	19	0
hsa-miR-744-3p	0	21.99	0
hsa-miR-1226-5p	0	23	0
hsa-miR-320b	0	23.61	0
hsa-miR-32-5p	0	24	0
hsa-miR-362-3p	0	24	0
hsa-miR-3613-5p	0	25	0
hsa-miR-425-3p	0	27	0
hsa-miR-122-5p	0	28.65	0
hsa-miR-92a-1-5p	0	32	0
hsa-miR-3613-3p	0	34	0
hsa-miR-362-5p	0	44	0
hsa-miR-451a	0	44	0
hsa-miR-452-5p	0	48	0
hsa-miR-454-5p	0	48	0
hsa-miR-431-3p	0	52	0
hsa-miR-7-1-3p	0	61	0
hsa-miR-127-5p	0	71	0
hsa-miR-31-3p	0	87	0
hsa-miR-324-5p	0	115	0
hsa-miR-182-5p	0	191	0
hsa-miR-425-5p	0	217	0
hsa-miR-132-3p	0	218	0
hsa-miR-369-5p	0	379	0
hsa-miR-323a-3p	0	385	0
hsa-miR-369-3p	0	451	0
hsa-miR-431-5p	0	593	0
hsa-miR-432-5p	0	1547.92	0
hsa-miR-31-5p	0	2197	0
hsa-miR-501-3p	0	2123.13	0
hsa-miR-93-5p	0	2476	0
hsa-miR-320a	0	4616.17	0
hsa-miR-92b-3p	0	6551	0
hsa-miR-126-5p	0	35617	0
hsa-miR-191-5p	0	81997	0
hsa-miR-22-3p	0	315959	0

## Sheet: CPC distribution list
only exosomes	only in "CPC cell":	Common elements in "cpc cell" and "cpc exosome":
hsa-miR-2110	hsa-miR-22-3p	hsa-miR-100-5p
hsa-miR-1270	hsa-miR-191-5p	hsa-miR-27b-3p
hsa-miR-1911-3p	hsa-miR-127-3p	hsa-miR-21-5p
hsa-miR-92b-5p	hsa-miR-92a-3p	hsa-miR-26a-5p
hsa-miR-933	hsa-miR-126-5p	hsa-let-7a-5p
hsa-miR-3116	hsa-miR-92b-3p	hsa-miR-143-3p
hsa-miR-1260b	hsa-miR-126-3p	hsa-miR-99b-5p
hsa-miR-2113	hsa-miR-320a	hsa-miR-181a-5p
hsa-miR-942	hsa-miR-93-5p	hsa-miR-221-3p
hsa-miR-320c	hsa-miR-501-3p	hsa-let-7i-5p
hsa-miR-1972	hsa-miR-31-5p	hsa-miR-21-3p
hsa-miR-1260a	hsa-miR-197-3p	hsa-let-7f-5p
hsa-miR-3611	hsa-miR-432-5p	hsa-miR-10a-5p
hsa-miR-5010-3p	hsa-miR-361-5p	hsa-miR-199a-3p
hsa-miR-4311	hsa-miR-431-5p	hsa-miR-199b-3p
hsa-miR-759	hsa-miR-369-3p	hsa-miR-16-5p
hsa-miR-3691-3p	hsa-miR-1271-5p	hsa-miR-151a-5p
hsa-miR-223-5p	hsa-miR-323a-3p	hsa-miR-186-5p
hsa-miR-4321	hsa-miR-369-5p	hsa-miR-27a-3p
hsa-miR-1273a	hsa-miR-132-3p	hsa-miR-381
hsa-miR-1825	hsa-miR-425-5p	hsa-let-7b-5p
hsa-miR-3690	hsa-miR-182-5p	hsa-miR-125b-5p
hsa-miR-215	hsa-miR-324-5p	hsa-miR-125a-5p
hsa-miR-4252	hsa-miR-31-3p	hsa-miR-146a-5p
hsa-miR-223-3p	hsa-miR-127-5p	hsa-miR-25-3p
hsa-miR-4540	hsa-miR-361-3p	hsa-miR-29a-3p
hsa-miR-1321	hsa-miR-7-1-3p	hsa-miR-28-3p
hsa-miR-32-3p	hsa-miR-2467-5p	hsa-miR-151a-3p
hsa-miR-1271-3p	hsa-miR-652-3p	hsa-miR-410
hsa-miR-3610	hsa-miR-431-3p	hsa-miR-199a-5p
hsa-miR-4520a-5p	hsa-miR-452-5p	hsa-miR-409-3p
hsa-miR-3115	hsa-miR-454-5p	hsa-let-7g-5p
hsa-miR-3621	hsa-miR-362-5p	hsa-let-7e-5p
hsa-miR-325	hsa-miR-451a	hsa-miR-181b-5p
hsa-miR-184	hsa-miR-26a-1-3p	hsa-miR-654-3p
hsa-miR-3614-3p	hsa-miR-3677-3p	hsa-miR-411-5p
hsa-miR-1322	hsa-miR-3613-3p	hsa-miR-23a-3p
hsa-miR-921	hsa-miR-629-3p	hsa-miR-199b-5p
hsa-miR-3158-5p	hsa-miR-1255a	hsa-miR-103a-3p
hsa-miR-4310	hsa-miR-92a-1-5p	hsa-miR-103b
hsa-miR-1911-5p	hsa-miR-616-5p	hsa-miR-10b-5p
hsa-miR-190a	hsa-miR-122-5p	hsa-miR-125b-1-3p
hsa-miR-3200-5p	hsa-miR-4454	hsa-miR-423-3p
hsa-miR-146b-5p	hsa-miR-425-3p	hsa-miR-136-3p
hsa-miR-3605-3p	hsa-miR-142-5p	hsa-miR-19b-3p
hsa-miR-4251	hsa-miR-3605-5p	hsa-miR-378c
hsa-miR-1185-5p	hsa-miR-3613-5p	hsa-miR-181a-3p
hsa-miR-2964a-3p	hsa-miR-708-5p	hsa-miR-769-5p
hsa-miR-539-5p	hsa-miR-330-5p	hsa-miR-98
hsa-miR-708-3p	hsa-miR-32-5p	hsa-miR-130a-3p
hsa-miR-375	hsa-miR-362-3p	hsa-miR-941
hsa-miR-664-5p	hsa-miR-320b	hsa-miR-155-5p
hsa-miR-671-5p	hsa-miR-1226-5p	hsa-miR-574-3p
hsa-miR-4662a-5p	hsa-miR-541-5p	hsa-miR-3184-3p
hsa-miR-211-5p	hsa-miR-744-3p	hsa-miR-423-5p
hsa-miR-30b-3p	hsa-miR-212-3p	hsa-let-7d-5p
hsa-miR-3607-3p	hsa-miR-4435	hsa-miR-192-5p
hsa-miR-934	hsa-miR-500a-5p	hsa-miR-889
hsa-miR-934	hsa-miR-561-3p	hsa-let-7c
	hsa-miR-212-5p	hsa-miR-181a-2-3p
	hsa-miR-1294	hsa-miR-19a-3p
	hsa-miR-139-5p	hsa-miR-210
	hsa-miR-181c-3p	hsa-miR-30a-3p
	hsa-miR-548aq-3p	hsa-miR-130b-3p
	hsa-miR-132-5p	hsa-miR-493-5p
	hsa-miR-224-3p	hsa-miR-34a-5p
	hsa-miR-580	hsa-miR-128
	hsa-miR-877-5p	hsa-miR-30a-5p
	hsa-miR-501-5p	hsa-miR-301a-3p
	hsa-miR-550a-3p	hsa-miR-30b-5p
	hsa-miR-550b-2-5p	hsa-miR-23b-3p
	hsa-miR-627	hsa-miR-1307-5p
	hsa-miR-548n	hsa-miR-145-5p
	hsa-miR-191-3p	hsa-miR-345-5p
	hsa-miR-3158-3p	hsa-miR-561-5p
	hsa-miR-3129-3p	hsa-miR-28-5p
	hsa-miR-542-5p	hsa-miR-15b-5p
	hsa-miR-378a-5p	hsa-miR-134
	hsa-miR-99a-3p	hsa-miR-409-5p
	hsa-miR-138-1-3p	hsa-miR-148a-3p
	hsa-miR-10a-3p	hsa-miR-532-5p
	hsa-miR-3152-5p	hsa-miR-30c-5p
	hsa-miR-143-5p	hsa-miR-222-5p
	hsa-miR-3940-3p	hsa-miR-340-5p
	hsa-miR-3200-3p	hsa-miR-484
	hsa-miR-33a-3p	hsa-miR-193b-3p
	hsa-miR-1262	hsa-miR-100-3p
	hsa-miR-296-5p	hsa-miR-486-5p
	hsa-miR-3174	hsa-miR-487b
	hsa-miR-605	hsa-miR-99a-5p
	hsa-miR-576-3p	hsa-miR-23c
	hsa-miR-4746-5p	hsa-miR-374a-3p
	hsa-miR-183-5p	hsa-miR-148b-3p
	hsa-miR-93-3p	hsa-miR-744-5p
	hsa-miR-135b-5p	hsa-miR-214-3p
	hsa-miR-769-3p	hsa-miR-376c
	hsa-miR-4645-3p	hsa-miR-17-5p
	hsa-miR-770-5p	hsa-miR-30e-3p
	hsa-miR-651	hsa-miR-421
		hsa-miR-625-3p
		hsa-miR-493-3p
		hsa-miR-20a-5p
		hsa-miR-149-5p
		hsa-miR-15a-5p
		hsa-miR-24-3p
		hsa-miR-3074-5p
		hsa-miR-378a-3p
		hsa-miR-589-5p
		hsa-miR-758
		hsa-miR-935
		hsa-miR-500a-3p
		hsa-miR-335-5p
		hsa-let-7f-2-3p
		hsa-miR-548k
		hsa-miR-584-5p
		hsa-miR-424-5p
		hsa-miR-301b
		hsa-miR-335-3p
		hsa-miR-1304-3p
		hsa-miR-574-5p
		hsa-miR-299-5p
		hsa-miR-455-5p
		hsa-miR-193a-3p
		hsa-miR-107
		hsa-miR-222-3p
		hsa-miR-106b-3p
		hsa-miR-655
		hsa-miR-660-5p
		hsa-miR-382-5p
		hsa-miR-29b-3p
		hsa-miR-374a-5p
		hsa-miR-450b-5p
		hsa-miR-99b-3p
		hsa-miR-26b-5p
		hsa-miR-27a-5p
		hsa-miR-495
		hsa-miR-22-5p
		hsa-miR-204-5p
		hsa-miR-379-5p
		hsa-miR-106b-5p
		hsa-miR-539-3p
		hsa-miR-1185-1-3p
		hsa-miR-485-3p
		hsa-miR-299-3p
		hsa-miR-664-3p
		hsa-miR-329
		hsa-miR-377-5p
		hsa-miR-339-3p
		hsa-miR-30d-5p
		hsa-miR-487a
		hsa-miR-323b-3p
		hsa-let-7d-3p
		hsa-miR-339-5p
		hsa-miR-195-5p
		hsa-miR-337-3p
		hsa-miR-185-5p
		hsa-miR-497-5p
		hsa-miR-27b-5p
		hsa-miR-214-5p
		hsa-miR-136-5p
		hsa-miR-376b
		hsa-miR-154-5p
		hsa-miR-656
		hsa-miR-4775
		hsa-miR-18a-5p
		hsa-miR-370
		hsa-miR-450a-5p
		hsa-miR-3184-5p
		hsa-miR-671-3p
		hsa-miR-101-3p
		hsa-miR-379-3p
		hsa-miR-138-5p
		hsa-miR-411-3p
		hsa-miR-502-3p
		hsa-miR-374b-5p
		hsa-miR-374c-3p
		hsa-let-7b-3p
		hsa-miR-30c-2-3p
		hsa-miR-218-5p
		hsa-miR-29c-3p
		hsa-miR-1285-3p
		hsa-miR-331-3p
		hsa-miR-15b-3p
		hsa-miR-505-3p
		hsa-miR-485-5p
		hsa-miR-454-3p
		hsa-miR-1180
		hsa-miR-1307-3p
		hsa-miR-543
		hsa-miR-377-3p
		hsa-miR-365a-3p
		hsa-miR-365b-3p
		hsa-miR-582-3p
		hsa-miR-589-3p
		hsa-miR-1296
		hsa-miR-548o-3p
		hsa-miR-4677-3p
		hsa-miR-181c-5p
		hsa-miR-380-3p
		hsa-miR-766-3p
		hsa-miR-376a-3p
		hsa-miR-382-3p
		hsa-miR-342-3p
		hsa-let-7a-3p
		hsa-miR-125a-3p
		hsa-miR-503
		hsa-miR-433
		hsa-miR-152
		hsa-miR-137
		hsa-miR-34c-5p
		hsa-miR-625-5p
		hsa-miR-376a-5p
		hsa-miR-30d-3p
		hsa-miR-548e
		hsa-miR-628-5p
		hsa-miR-424-3p
		hsa-miR-193a-5p
		hsa-miR-224-5p
		hsa-miR-194-5p
		hsa-miR-140-5p
		hsa-miR-17-3p
		hsa-miR-221-5p
		hsa-miR-328
		hsa-miR-146a-3p
		hsa-miR-455-3p
		hsa-miR-18a-3p
		hsa-miR-1197
		hsa-miR-654-5p
		hsa-miR-26b-3p
		hsa-miR-30c-1-3p
		hsa-miR-153
		hsa-miR-195-3p
		hsa-miR-590-3p
		hsa-let-7i-3p
		hsa-miR-548d-5p
		hsa-miR-26a-2-3p
		hsa-miR-140-3p
		hsa-miR-1910
		hsa-miR-145-3p
		hsa-miR-181d
		hsa-let-7f-1-3p
		hsa-miR-34a-3p
		hsa-miR-641
		hsa-miR-337-5p
		hsa-miR-550a-5p
		hsa-miR-542-3p
		hsa-miR-532-3p
		hsa-miR-23a-5p
		hsa-miR-582-5p
		hsa-miR-331-5p
		hsa-miR-130b-5p
		hsa-miR-1185-2-3p
		hsa-miR-548aa
		hsa-miR-548t-3p
		hsa-miR-30e-5p
		hsa-miR-2682-5p
		hsa-miR-496
		hsa-miR-374b-3p
		hsa-let-7e-3p
		hsa-miR-548w
		hsa-miR-887
		hsa-miR-181b-3p
		hsa-miR-29a-5p
		hsa-miR-3909
		hsa-miR-494
		hsa-miR-629-5p
		hsa-miR-874
		hsa-miR-125b-2-3p
		hsa-miR-154-3p
		hsa-miR-296-3p
		hsa-miR-576-5p
		hsa-miR-1301
		hsa-miR-33a-5p
		hsa-miR-2355-5p
		hsa-let-7a-2-3p
		hsa-miR-3529-3p
		hsa-miR-548h-3p
		hsa-miR-548z
		hsa-miR-2277-5p
		hsa-miR-141-3p
		hsa-miR-1287
		hsa-miR-330-3p
		hsa-miR-29b-1-5p
		hsa-miR-193b-5p
		hsa-miR-148a-5p
		hsa-miR-1249
		hsa-miR-16-2-3p
		hsa-miR-33b-3p
		hsa-miR-937
		hsa-miR-200c-3p
		hsa-miR-665
		hsa-miR-1277-5p
