# Supplementary material for: Cardiac Progenitor Cell Exosomal miR-935 Protects against Oxidative Stress
Source: Cells. 2023 Sep 18;12(18):2300. doi: 10.3390/cells12182300 (PMC10528297; doi:10.3390/cells12182300)
Supplement: Supplementary file 1 [file cells-12-02300-s001.zip › Table S5. miRNA CPC vs. MSC_HDF.xlsx]

## Sheet:  Table S5
	miRNA DeG CPC_MSC	logFC CPC/MSC	logFC CPC/HDF
	hsa-miR-935	10.4321	7.19391
	hsa-miR-135b-5p	7.32318	4.09769
	hsa-miR-146a-5p	6.84673	3.88761
	hsa-miR-1910	6.61022	6.61022
	hsa-miR-582-3p	4.59495	3.81813
	hsa-miR-146a-3p	4.45843	7.98119
	hsa-miR-625-3p	3.32876	1.81539
	hsa-miR-1268a	3.04405	2.16469
	hsa-miR-31-5p	1.99835	1.57405
	hsa-miR-584-5p	1.98757	2.01573
	hsa-miR-149-5p	1.68476	1.72959
	hsa-miR-21-3p	1.46865	1.48724
	hsa-miR-145-3p	-1.71104	-1.41388
	hsa-miR-139-5p	-1.76693	5.11634
	hsa-miR-143-5p	-1.79514	-1.36452
	hsa-miR-152	-1.82052	-1.59724
	hsa-miR-34c-5p	-1.87737	-3.25028
	hsa-miR-1290	-1.88804	-2.03446
	hsa-miR-365a-3p	-1.88939	-1.92098
	hsa-miR-365b-3p	-1.88944	-1.92115
	hsa-miR-4485	-2.00865	-1.97828
	hsa-miR-148a-3p	-2.26319	-1.83523
	hsa-miR-138-5p	-3.10828	-4.19815
	hsa-miR-1260a	-3.14743	-4.27855
	hsa-miR-549	-3.24905	-2.78817
	hsa-miR-148a-5p	-3.4207	-2.34405
	hsa-miR-144-3p	-3.82932	-3.43309
	hsa-miR-486-5p	-4.38656	-2.97301
	hsa-miR-196a-5p	-4.82043	-4.43653
	hsa-miR-3591-5p	-5.42987	-5.16206
	hsa-miR-615-5p	-5.4564	-5.02506
	hsa-miR-615-3p	-5.51016	-4.61303
	hsa-miR-4461	-5.5164	-5.51904
	hsa-miR-10b-5p	-5.58923	-5.31289
	hsa-miR-504	-5.7776	-5.15925
	hsa-miR-490-3p	-6.02875	-8.08632
	hsa-miR-618	-6.14781	-4.926
	hsa-miR-203	-8.72128	-6.08017
	hsa-miR-10b-3p	-9.35363	-8.65069
	hsa-miR-196b-5p	-9.76388	-11.456
