# Supplementary material for: Cardiac Progenitor Cell Exosomal miR-935 Protects against Oxidative Stress
Source: Cells. 2023 Sep 18;12(18):2300. doi: 10.3390/cells12182300 (PMC10528297; doi:10.3390/cells12182300)
Supplement: Supplementary file 1 [file cells-12-02300-s001.zip › Table S6. Target Trancriptional Factor for CPC exosomal miRNA.xlsx]

## Sheet: Hoja1
SUMMARY TF				MIRNA UP :	RNA DOWN	( pairs )
by FC targets
miRNA	FC (CPC/MSC)	p-value	prediction	target	FC (CPC/MSC)	p-value	activity
	miRNA				target
hsa-miR-139-5p	7.188	3.22E-05	High	MAF	-10.966	4.91E-16	transcription regulator	IL-12 Signaling and Production in Macrophages NRF2
			High	HOXA9	-9675	3.09E-10	transcription regulator
			High	PRDM16	-9.233	6.29E-07	transcription regulator
hsa-miR-1910	6.641	2.18E-09	High	HOXA3	-4.066	2.95E-03	transcription regulator
hsa-miR-146a-5p	9.144	1.27E-21	High	RUNX1T1	-3.738	2.23E-06	transcription regulator
hsa-miR-146a-5p	9.144	1.27E-21	High	MYBL1	-2.902	9.09E-08	transcription regulator
hsa-miR-139-5p	7.188	3.22E-05	High	MYBL1	-2.902	9.09E-08	transcription regulator
hsa-miR-139-5p	7.188	3.22E-05	High	EBF1	-2.586	2.16E-05	transcription regulator
hsa-miR-139-5p	7.188	3.22E-05	High	AFF3	-2.530	2.64E-02	transcription regulator
hsa-miR-139-5p	7.188	3.22E-05	High	CSRNP3	-2.449	1.25E-01	transcription regulator
hsa-miR-935	10.266	6.34E-28	Moderate	ARNT2	-2.254	1.37E-04	transcription regulator
hsa-miR-146a-5p	9.144	1.27E-21	High	PBX2	-2.246	2.32E-01	transcription regulator
hsa-miR-126-3p	5.814	3.00E-15	High	ZNF219	-2.196	8.25E-03	transcription regulator
hsa-miR-146a-5p	9.144	1.27E-21	Exper. Observed	NFIX	-1.564	2.33E-02	transcription regulator	Aryl Hydrocarbon Receptor Signaling
hsa-miR-935	10.266	6.34E-28	Moderate	STAT1	-1.478	3.70E-02	transcription regulator	Activation of IRF Signaling in Hematopoietic Progenitors
hsa-miR-146a-5p	9.144	1.27E-21	Exper. Observed	STAT1	-1.478	3.70E-02	transcription regulator	Activation of IRF
hsa-miR-146a-5p	9.144	1.27E-21	Moderate	RCAN1	-1.428	1.63E-02	transcription regulator	Calcium Signaling Role of NFAT in Cardiac Hypertrophy
hsa-miR-139-5p	7.188	3.22E-05	High	FOXP2	-1.368	4.75E-01	transcription regulator
hsa-miR-139-5p	7.188	3.22E-05	High	JDP2	-1.366	2.64E-02	transcription regulator
hsa-miR-146a-5p	9.144	1.27E-21	High	JAZF1	-1.221	2.09E-02	transcription regulator
hsa-miR-146a-5p	9.144		Moderate	TEAD1	-1.090	9.23E-02	transcription regulator
hsa-miR-139-5p	7.188	3.22E-05	Moderate	MEF2A	-1.070	8.54E-02	transcription regulator	Calcium Signaling Cardiac Hypertrophy Signaling
hsa-miR-1910	6.641	2.18E-09	Moderate	TOB1	-1.070	1.73E-01	transcription regulator	Antiproliferative Role of TOB in T Cell Signaling Regulation of IL-2
hsa-miR-146a-5p	9.144	1.27E-21	High	NOTCH2	-1.009	1.78E-01	transcription regulator	Epithelial Adherens Junction Signaling Notch Signaling
hsa-miR-1910	6.641	2.18E-09	High	HTT	-0.000	1.00E00	transcription regulator	Huntington's Disease Signaling
hsa-miR-935	10.266	6.34E-28	Moderate	GMEB1	-0.003	9.99E-01	transcription regulator
hsa-miR-146a-5p	9.144	1.27E-21	Moderate	ZNF136	-0.006	9.98E-01	transcription regulator
hsa-miR-146a-5p	9.144	1.27E-21	High	BCL11A	-0.010	9.98E-01	transcription regulator
hsa-miR-146a-5p	9.144	1.27E-21	Moderate	SIX4	-0.010	9.96E-01	transcription regulator
