# Supplementary material for: Cardiac Progenitor Cell Exosomal miR-935 Protects against Oxidative Stress
Source: Cells. 2023 Sep 18;12(18):2300. doi: 10.3390/cells12182300 (PMC10528297; doi:10.3390/cells12182300)
Supplement: Supplementary file 1 [file cells-12-02300-s001.zip › Table S7 . ExoMIR functions. Positive and Negative implications in Cancer and Homeostasis.pdf]

**Table S7 (exo-MIRs)**

## Homeostasis

### Positive implications

| <b>miRNA</b><br>(Cell/Exo)                             | <b>Functional indication</b>                                                                                                                            | <b>Target</b>  | <b>Reference</b>                                                |
|--------------------------------------------------------|---------------------------------------------------------------------------------------------------------------------------------------------------------|----------------|-----------------------------------------------------------------|
| <b>miR-21</b><br><b>-3p</b> (29/1)<br><b>-5p</b> (1/1) | Prevent cardiomyocyte apoptosis<br>Inhibit apoptosis and oxidative stress (OS)                                                                          | PDCD4          | (Xiao et al, 2016)<br>(Young et al., 2020)                      |
| <b>miR-126-3p</b><br>(1/18)                            | Pro-angiogenic function in AMI<br>miR-126 enriched exosomes /therapeutic against AMI                                                                    | ERRFI1         | (Wang et al., 2019)<br>(Luo et al., 2017)                       |
| <b>miR-146a-5p</b><br>(1/1)                            | Attenuate oxidative stress (OS) in cardiomyocytes<br>Protect against ischemia/reperfusion (Lung)<br>Protect against renal ischemia/reperfusion (Kidney) | IRAK1<br>IRAK1 | (Milano et al., 2020)<br>(Li et al., 2019)<br>(Li et al., 2020) |
| <b>miR-210</b><br>(12/1)                               | Alleviate Endothelial Oxidative Stress<br>Regulates stress-induction                                                                                    | Nox2           | (Liu et al., 2017)<br>(Day et al., 2019)                        |
| <b>miR-935</b><br>(2/1)                                | Favors prolifer /different (BMSC-exo) of osteoblasts                                                                                                    | STAT1          | (Zhang et al., 2021)                                            |

### Negative role

| <b>miRNA</b><br>(Cell/Exo)                                    | <b>Functional indication</b>                                               | <b>Target</b> | <b>Reference</b>                                    |
|---------------------------------------------------------------|----------------------------------------------------------------------------|---------------|-----------------------------------------------------|
| <b>microRNA-27a</b><br><b>-5p</b> (1/1)<br><b>-3p</b> (1/1.5) | Contribute to oxidative stress (OS)                                        | Nrf2          | (Tian et al., 2018)                                 |
| <b>microRNA-28-3p</b><br>(7.5/1)                              | Contributes to oxidative stress (OS)                                       | Nrf2          | (Tian et al., 2018)                                 |
| <b>microRNA-34a</b><br><b>-5p</b> (11/1)<br><b>-3p</b> (32/0) | Contribute to oxidative stress (OS)                                        | Nrf2          | (Tian et al., 2018)                                 |
| <b>miR-146a-5p</b><br>(1/3)                                   | Aggravates Alzheimer progression; promotes neural cells                    | OS            | (Zhan-Qiang et al., 2021)                           |
| <b>miR-1268a</b><br>(0/95)                                    | Facioscapulohumeral muscular dystrophy in myotubes<br>Gestational diabetes |               | (Colangelo et al., 2014)<br>(Collares et al., 2013) |

## Cancer

### Promotion

| <b>miRNA</b><br>(Cell/Exo)  | <b>Functional indication</b>                                                                                                                                           | <b>Target</b>                                                                       | <b>Reference</b>                                                                                                                                              |
|-----------------------------|------------------------------------------------------------------------------------------------------------------------------------------------------------------------|-------------------------------------------------------------------------------------|---------------------------------------------------------------------------------------------------------------------------------------------------------------|
| <b>miR-135b-5p</b><br>(1/2) | Promotion of gastric and pancreatic cancer                                                                                                                             | KLF4<br>NR3C2                                                                       | (Liu et al., 2022)<br>(Zhang et al., 2017)                                                                                                                    |
| <b>miR-625-3p</b><br>(1/7)  | Non-small cell lung cancer<br>Mesothelioma                                                                                                                             |                                                                                     | (Du et al., 2020)<br>(Goricar et al., 2021)                                                                                                                   |
| <b>miR-935</b><br>(2/1)     | Gastric cancer<br>Non-small cell lung cancer<br>Clear Cell Renal Cell Carcinoma<br>Non-small cell cancer<br>Glioma<br>Colorectal cancer<br>Colorectal cancer (generic) | SOX7<br>SOX7<br>IREB2<br>IL-27<br>HIF1 $\alpha$<br>INPP4A<br>KRAS-dependent sorting | (Yang et al., 2021)<br>(Peng et al., 2017)<br>(Liu et al., 2019)<br>(Abdi et al., 2020)<br>(Huang et al., 2020)<br>(Huang et al., 2019)<br>(Cha et al., 2015) |
| <b>miR-2110</b><br>(0.1/10) | Triple-negative breast cancer                                                                                                                                          |                                                                                     | (Zhang et al., 2021)                                                                                                                                          |

### Inhibition

| <b>miRNA</b><br>(Cell/Exo) | <b>Functional indication</b>                                                                      | <b>Target</b>           | <b>Reference</b>                                                      |
|----------------------------|---------------------------------------------------------------------------------------------------|-------------------------|-----------------------------------------------------------------------|
| <b>miR-625-3p</b><br>(1/8) | Gastric cancer metastasis                                                                         | EZH2                    | (Li et al., 2020)                                                     |
| <b>miR-935</b><br>(2/1)    | Osteosarcoma, inhibits proliferation and invasion<br>Oral Squamous Cell Carcinoma<br>Glioblastoma | HMGB1<br>INPP4A<br>FZD6 | (Liu et al., 2018)<br>(Maruyama et al., 2020)<br>(Zhang et al., 2021) |
